# Supplementary material for: Can Large Language Models (LLMs) and Retrieval-Augmented Generation (RAG) Generate New Knowledge for Urban Studies?
Source: Research Square preprint supplement (doi:10.21203/rs.3.rs-6551928/v1), 2025-04-30
Supplement: Supplementary file 1 [file a5a7e6f559b4d1ffea4f02bc.docx]

## TOPIC1: Potential and Governance Mechanisms for Vacant Urban Land as Temporary Infrastructure.

## -How can vacant urban land be rapidly transformed into emergency facilities (e.g., temporary medical centers, shelters) during crises such as epidemics or climate disasters?

## -What strategies can overcome challenges in planning, property rights coordination, and legal barriers? (Note: Existing studies tend to focus on long-term planning, and there is a lack of empirical analysis on the dynamic governance of temporary functions.)

### Model: Qwen2.5-7b

### Topic 1: Potential and Governance Mechanisms for Vacant Urban Land as Temporary Infrastructure

#### Introduction
Vacant urban land can serve as a critical resource during crises such as epidemics or climate disasters. However, transforming this land into emergency facilities like temporary medical centers or shelters requires effective governance mechanisms that address planning, property rights coordination, and legal barriers. This topic explores potential strategies to rapidly repurpose vacant urban land for these purposes.

#### Potential Uses of Vacant Urban Land

1. Temporary Medical Centers: Hospitals can be temporarily expanded by converting unused spaces into clinics, isolation wards, or triage centers.
2. Shelters: Schools, community centers, and other large buildings can be quickly converted into shelters to accommodate displaced individuals.
3. Logistics and Distribution Centers: Warehouses and open spaces can serve as distribution hubs for medical supplies, food, and other essential items.

#### Challenges in Planning

1. Coordination Among Stakeholders: Effective collaboration between government agencies, non-profits, private developers, and community organizations is crucial.
2. Resource Allocation: Ensuring that necessary resources (e.g., materials, personnel) are available for rapid deployment.
3. Public Awareness and Support: Engaging the public to understand the importance of repurposing vacant land can facilitate smoother implementation.

#### Property Rights Coordination

1. Temporary Use Agreements: Establishing agreements with property owners or landlords that allow for temporary use without permanent changes to the property.
2. Government Incentives: Offering tax breaks, subsidies, or other incentives to encourage property owners to agree to temporary use.
3. Legal Frameworks: Developing clear legal frameworks that define the terms and conditions of temporary land use.

#### Legal Barriers

1. Zoning Regulations: Modifying zoning laws to allow for emergency use of vacant land without violating existing regulations.
2. Building Codes and Safety Standards: Ensuring that repurposed spaces meet safety standards, even if only temporarily.
3. Environmental Impact Assessments: Conducting quick assessments to ensure minimal environmental impact during the crisis.

#### Strategies to Overcome Challenges

1. Pre-Existing Plans and Inventories: Develop comprehensive inventories of vacant urban land and establish pre-existing plans for their potential use in emergencies.
2. Public-Private Partnerships (PPPs): Foster partnerships between public entities and private sector organizations to leverage resources and expertise.
3. Technology Integration: Utilize technology such as geographic information systems (GIS) and data analytics to optimize the selection and repurposing of vacant land.

#### Empirical Analysis

1. Case Studies: Conduct case studies on successful implementations in various cities to identify best practices and lessons learned.
2. Simulation Models: Develop simulation models to predict the effectiveness of different governance mechanisms under varying crisis scenarios.
3. Feedback Loops: Implement feedback loops from stakeholders to continuously improve strategies based on real-world experiences.

#### Conclusion

Rapidly transforming vacant urban land into emergency facilities requires a multi-faceted approach that addresses planning, property rights coordination, and legal barriers. By leveraging pre-existing plans, fostering public-private partnerships, and integrating technology, cities can better prepare for crises while minimizing disruptions to daily life. Empirical analysis through case studies and simulation models will provide valuable insights to refine these strategies further.

This topic highlights the importance of proactive governance mechanisms in ensuring that vacant urban land can be effectively repurposed during emergencies, thereby enhancing community resilience and response capabilities.

### Model: Llama3.1-8b

The strategic utilization of vacant urban land as temporary infrastructure during crises has garnered significant attention in recent years. This topic involves understanding how vacant spaces can be rapidly repurposed into emergency facilities such as medical centers or shelters, especially during epidemics or climate disasters. The challenges in planning, property rights coordination, and legal barriers are substantial but not insurmountable with the right strategies.

### Strategies for Rapid Transformation

1. Pre-Crisis Planning: Establishing a framework that allows for rapid transformation of vacant land into emergency facilities requires pre-crisis planning. This includes mapping out potential sites, understanding local zoning laws and property rights, and identifying resources needed for such transformations.
2. Collaborative Governance: Effective governance during crises often involves collaboration among government agencies, private sector entities, and community groups. Establishing partnerships before a crisis can streamline the process of converting vacant land into emergency facilities.
3. Legal Frameworks: Developing legal frameworks that facilitate rapid conversion of property for temporary use is crucial. This might involve revising zoning laws or creating special permits for emergency situations.
4. Community Engagement: Engaging with local communities to understand their needs and concerns can help in identifying the most suitable vacant land for emergency facilities. It also fosters a sense of ownership and cooperation during crisis management.
5. Technological Solutions: Leveraging technology, such as mapping tools and digital platforms, can enhance the efficiency of identifying, assessing, and converting vacant land into temporary infrastructure.

### Overcoming Challenges

1. Property Rights Coordination: This involves ensuring that property owners are aware of and agree to the temporary use of their land for emergency purposes.
2. Legal Barriers: Addressing legal barriers requires a deep understanding of local laws and regulations, as well as the ability to adapt these frameworks during crises.
3. Planning and Coordination: Effective planning and coordination among stakeholders are essential for ensuring that vacant land is utilized efficiently and effectively.

### Empirical Analysis

Empirical analysis plays a crucial role in understanding the effectiveness of strategies for transforming vacant urban land into temporary infrastructure. This involves case studies, surveys, and other research methods to identify best practices and areas for improvement.

In conclusion, while there are challenges associated with rapidly transforming vacant urban land into emergency facilities during crises, these can be overcome through strategic planning, collaborative governance, legal frameworks that facilitate rapid conversion of property, community engagement, and the use of technological solutions. Empirical analysis is essential for refining these strategies and ensuring their effectiveness in various contexts.

### Model: Deepseek-R1-7b

To address the challenge of converting vacant urban land into emergency facilities during crises, a comprehensive and multi-faceted approach is necessary. Here's a structured strategy:

1. Incentives and Financial Support: Offer incentives such as tax breaks or subsidies to encourage the use of vacant land for emergencies. This could be done without expecting anything in return, making it an attractive option.

2. Dynamic Governance Framework: Implement a prioritization system using technology like GIS mapping to quickly assess needs and assign land accordingly. This ensures efficient allocation based on current demands.

3. Stakeholder Coordination: Establish a central authority to mediate between government, private entities, non-profits, and local communities. Clear rules and guidelines facilitate smooth collaboration without conflicts.

4. Legal Streamlining: Create temporary use agreements that bypass lengthy formal approval processes during emergencies. Consider special-purpose districts with flexible land use regulations for emergencies.

5. Community Participation: Engage locals in decision-making to leverage their knowledge and resources, fostering a sense of ownership and responsibility towards public needs.

6. Learning from Best Practices: Study successful cases from other regions or cities that have repurposed land quickly during crises, adopting proven strategies and adapting them to local contexts.

7. Long-term Considerations: Ensure that post-emergency land reversion plans are considered to maintain property values and zoning laws, preventing future disruptions.

8. International Collaboration: Share best practices internationally, fostering partnerships and learning from diverse approaches to emergency management.

By integrating these elements, vacant urban land can be rapidly transformed into essential facilities during crises, overcoming existing challenges through a coordinated and adaptive strategy.

### Model: Gemma3-4b

Okay, let’s tackle Topic 1: Potential and Governance Mechanisms for Vacant Urban Land as Temporary Infrastructure. This is a critical area underserved by existing research, focusing on the dynamic, rapid deployment of vacant land during crises – a shift from long-term planning to a responsive governance model.

**1. Rapid Transformation Potential:**

* **Scalability:** Vacant land, particularly in dense urban areas, represents a readily available, untapped resource. Its inherent proximity to populations makes it ideal for rapid deployment.
* **Modular Design:** The concept of “temporary” lends itself to modular designs – think containerized medical units, pop-up shelters constructed from readily available materials, or repurposed industrial buildings.
* **Low Initial Investment:** Compared to constructing new permanent facilities, temporary use of vacant land can dramatically reduce upfront costs.

**2. Key Governance Mechanisms & Strategies:**

* **Emergency Zoning & Streamlined Permitting:** This is *the* critical lever. Cities need to establish “emergency zoning” categories that temporarily override standard zoning regulations. This would require:
 * **Rapid Approval Processes:** Establishing expedited permitting processes specifically for temporary facilities. This could involve a single-stop permitting office and pre-approved templates.
 * **Designated “Crisis Zones”:** Identifying specific areas as “Crisis Zones” with simplified regulations.
* **Property Rights Coordination – The Biggest Challenge:**
 * **Land Banking Partnerships:** Cities could partner with private landowners willing to temporarily lease or donate land in exchange for recognition and potential future development rights.
 * **Temporary Use Agreements:** Formal agreements with landowners outlining terms of use, liability, and duration.
 * **Land Acquisition Strategies:** Utilizing eminent domain powers strategically for temporary use, with clear sunset clauses and compensation.
* **Legal Barriers & Mitigation:**
 * **Legal Frameworks for Temporary Use:** Developing clear legal frameworks that define temporary use, liability, and insurance requirements.
 * **Liability Protection:** Implementing legal mechanisms to protect both the city and landowners from liability during temporary use.
 * **Standardized Contracts:** Utilizing standardized contracts to streamline the negotiation process.
* **Multi-Stakeholder Governance:**
 * **Cross-Departmental Collaboration:** Establishing a dedicated task force with representatives from planning, public health, emergency management, legal, and finance departments.
 * **Community Engagement:** Including community representatives in the decision-making process to ensure local needs are addressed.
 * **Private Sector Partnerships:** Engaging architects, contractors, and non-profit organizations to provide technical expertise and resources.

**3. Overcoming Challenges – A Dynamic Approach:**

* **Addressing “NIMBYism”:** Proactive communication and community engagement are crucial to address concerns about temporary facilities. Demonstrating the benefits of rapid response and highlighting the temporary nature of the intervention can help overcome resistance.
* **Flexibility & Adaptability:** Governance structures must be flexible and adaptable to changing circumstances. Regular review and adjustments are essential.
* **Data-Driven Decision Making:** Utilizing real-time data on population density, vulnerability, and resource needs to inform deployment decisions.

**4. Moving Beyond Existing Research:**

* **Empirical Analysis:** We need more case studies examining the actual processes of deploying temporary facilities on vacant land – the speed, the coordination, the challenges encountered.
* **Process Mapping:** Developing process maps to visualize the flow of information and decision-making during crisis events.
* **Cost-Benefit Analysis:** Conducting cost-benefit analyses of temporary use versus permanent construction.

**In essence, transforming vacant urban land into temporary infrastructure requires a shift from a long-term, planned approach to a dynamic, responsive governance model – one that prioritizes speed, flexibility, and collaboration.** It’s a critical area for future research and policy development.

Do you want me to delve deeper into a specific aspect of this topic (e.g., a particular governance mechanism, a case study scenario, or a methodological approach)?

### Model: GPT-4o-mini

## TOPIC 1: Potential and Governance Mechanisms for Vacant Urban Land as Temporary Infrastructure

Vacant urban land presents a unique opportunity to serve as emergency infrastructure during crises such as epidemics or climate disasters. Rapid transformation of these spaces into temporary facilities—like medical centers or shelters—requires agile governance mechanisms and strategic planning. Below are key strategies and considerations for facilitating this process.

### 1. Rapid Transformation of Vacant Land

A. Assessment of Existing Resources:
- Conduct an inventory of vacant urban land to identify suitable sites for temporary use. Consider proximity to essential services, accessibility, and infrastructure availability (e.g., utilities, transportation).
- Evaluate the physical condition of the land to determine its readiness for immediate use, including soil quality, contamination issues, and structural integrity of existing buildings.

B. Flexible Design Solutions:
- Implement modular and portable designs for emergency facilities that can be quickly assembled and disassembled.
- Use prefabricated units that can be deployed rapidly, minimizing construction time and disruption.

### 2. Overcoming Challenges in Planning and Coordination

A. Streamlined Planning Processes:
- Develop emergency planning frameworks that allow for expedited approvals and permitting processes for temporary uses.
- Create a “fast-track” permitting system specifically for temporary structures in emergency situations to circumvent lengthy bureaucratic hurdles.

B. Cross-Agency Collaboration:
- Establish partnerships between government agencies, non-profits, and community organizations to coordinate efforts efficiently.
- Form an inter-agency task force dedicated to emergency preparedness and response, focusing on the rapid deployment of temporary facilities.

### 3. Managing Property Rights and Legal Barriers

A. Temporary Use Agreements:
- Implement temporary use agreements that allow municipalities to use vacant land for emergency purposes without lengthy negotiations with property owners.
- Develop legal frameworks that provide clear guidelines on temporary land use, including liability protection for landowners and operators of emergency facilities.

B. Community Engagement and Buy-In:
- Engage local communities in discussions about potential uses for vacant land. This can foster support for temporary facilities and address community concerns.
- Offer incentives for property owners to allow their land to be used temporarily, such as tax breaks or maintenance support.

### 4. Empirical Analysis and Dynamic Governance

A. Data-Driven Approaches:
- Utilize data analytics and GIS mapping to identify trends in vacant land usage and effectiveness of temporary facilities in past emergencies.
- Collect real-time data during crises to adapt strategies dynamically, ensuring that temporary uses meet the evolving needs of the community.

B. Pilot Programs and Case Studies:
- Implement pilot programs that test temporary facility models in different neighborhoods, analyzing successes and challenges.
- Document case studies of successful transformations of vacant land into emergency facilities to inform future governance strategies.

### Conclusion

The potential of vacant urban land as temporary infrastructure during crises hinges on effective governance mechanisms and strategic planning. By streamlining planning processes, fostering collaboration, managing property rights proactively, and leveraging data-driven approaches, cities can transform these spaces into vital resources that enhance community resilience in times of need. Addressing the challenges of temporary land use requires innovative thinking and a commitment to dynamic governance that prioritizes flexibility and responsiveness.

### Model: Qwen-2.5-72b

### Potential and Governance Mechanisms for Vacant Urban Land as Temporary Infrastructure

#### Introduction
Vacant urban land represents a significant untapped resource that can be rapidly transformed into emergency facilities during crises such as epidemics or climate disasters. These facilities can include temporary medical centers, shelters, and distribution hubs. However, the rapid deployment of such facilities faces several challenges, including planning, property rights coordination, and legal barriers. This discussion aims to explore the potential and governance mechanisms for utilizing vacant urban land in emergency scenarios, focusing on strategies to overcome these challenges.

#### Potential of Vacant Urban Land
1. **Rapid Deployment**: Vacant urban land can be quickly repurposed to meet urgent needs, reducing the time and resources required to establish emergency facilities.
2. **Flexibility**: These spaces can be adapted to various functions, such as medical care, housing, and distribution centers, depending on the crisis.
3. **Proximity to Affected Areas**: Urban land is often located near densely populated areas, making it easier to access and serve those in need.
4. **Reduced Environmental Impact**: Utilizing existing land reduces the need for new construction, minimizing environmental disruption.

#### Challenges
1. **Planning and Coordination**:
 - **Lack of Pre-Existing Plans**: Emergency situations often require immediate action, but the absence of pre-existing plans can lead to delays.
 - **Interagency Coordination**: Effective collaboration between local, state, and federal agencies is essential but can be challenging to achieve quickly.

2. **Property Rights**:
 - **Ownership Disputes**: Determining the legal ownership and rights of vacant land can be complex and time-consuming.
 - **Compensation Issues**: Landowners may require compensation for the use of their property, which can be a significant barrier.

3. **Legal Barriers**:
 - **Zoning and Land Use Regulations**: Existing regulations may not allow for the rapid conversion of land to emergency uses.
 - **Environmental and Safety Standards**: Meeting regulatory requirements for temporary facilities can be challenging and time-intensive.

#### Strategies to Overcome Challenges
1. **Pre-Existing Planning and Zoning Flexibility**:
 - **Emergency Land Use Plans**: Develop and maintain comprehensive emergency land use plans that identify potential sites and outline procedures for rapid deployment.
 - **Flexible Zoning Ordinances**: Implement zoning ordinances that allow for temporary changes in land use during emergencies.

2. **Property Rights Coordination**:
 - **Public-Private Partnerships**: Establish partnerships with private landowners to pre-negotiate terms for the use of their land in emergencies.
 - **Compensation Mechanisms**: Develop clear and fair compensation mechanisms to address landowner concerns and facilitate rapid land use.

3. **Legal and Regulatory Streamlining**:
 - **Expedited Approval Processes**: Create expedited approval processes for emergency land use, including streamlined environmental and safety reviews.
 - **Temporary Waivers**: Implement temporary waivers for certain regulations to allow for the rapid establishment of emergency facilities.

4. **Community Engagement and Participation**:
 - **Stakeholder Involvement**: Engage with local communities and stakeholders to gain support and ensure that emergency facilities meet the needs of the affected population.
 - **Transparency and Communication**: Maintain transparent and consistent communication to build trust and address concerns.

5. **Technology and Data-Driven Solutions**:
 - **GIS and Spatial Analysis**: Utilize Geographic Information Systems (GIS) to identify and assess potential sites for emergency facilities.
 - **Real-Time Data Sharing**: Implement real-time data sharing platforms to coordinate efforts among multiple agencies and stakeholders.

#### Case Studies and Empirical Analysis
While existing studies often focus on long-term planning, empirical analysis of dynamic governance in temporary functions is limited. Case studies from recent crises, such as the COVID-19 pandemic and natural disasters, can provide valuable insights:
- **COVID-19 Pandemic**: Analyze how cities repurposed vacant land for temporary hospitals and quarantine centers, including the processes and challenges encountered.
- **Natural Disasters**: Examine the use of vacant land for emergency shelters and aid distribution centers during hurricanes, floods, and earthquakes.

#### Conclusion
The rapid transformation of vacant urban land into emergency facilities is a critical strategy for addressing crises. By developing pre-existing plans, coordinating property rights, streamlining legal processes, engaging the community, and leveraging technology, cities can overcome the challenges and maximize the potential of vacant urban land. Empirical analysis of recent case studies will further refine these strategies and inform best practices for dynamic governance in temporary functions.

### Model: Llama-3.1-70b

Transforming vacant urban land into temporary infrastructure is an innovative approach to addressing crises, especially during epidemics or climate disasters. Here are some potential strategies to rapidly transform vacant urban land into emergency facilities and overcome challenges in planning, property rights coordination, and legal barriers:

1. **Dynamic Governance Frameworks**: Establishing flexible governance frameworks that enable swift decision-making and coordination among stakeholders, such as local governments, property owners, and emergency responders.
2. **Vacant Land Identification and Mapping**: Creating a database or map of vacant urban land to identify potential sites for temporary infrastructure, streamlining the planning and coordination process.
3. **Collaborative Partnerships**: Fostering partnerships between governments, private landowners, NGOs, and community groups to facilitate information sharing, resource mobilization, and mutual support.
4. **Adaptive Rezoning and Land-Use Regulations**: Implementing adaptive rezoning and land-use regulations that allow for temporary changes in land use, enabling rapid transformation of vacant land into emergency facilities.
5. **Property Rights Coordination**: Developing strategies for coordinating property rights, such as temporary easements or licenses, to facilitate access to vacant land for emergency purposes.
6. **Community Engagement and Participation**: Engaging with local communities to raise awareness, build trust, and involve them in the planning and decision-making process, ensuring that temporary infrastructure meets the needs of the affected population.
7. **Modular, Prefabricated Infrastructure**: Using modular, prefabricated infrastructure design, allowing for rapid deployment and installation of emergency facilities, such as temporary medical centers or shelters.
8. **Emergency Response Plans**: Developing and regularly updating emergency response plans that include protocols for activating temporary infrastructure, ensuring a rapid and coordinated response to crises.
9. **Legal and Regulatory Changes**: Advocating for changes in laws and regulations to facilitate the temporary use of vacant land for emergency purposes, such as amendments to zoning laws or emergency powers legislation.
10. **Monitoring and Evaluation**: Establishing mechanisms for monitoring and evaluating the effectiveness of temporary infrastructure, providing valuable lessons for future improvements.

Overcoming challenges:

1. **Addressing NIMBYism (Not-In-My-Backyard)**: Engaging with local communities to address concerns and build support for temporary infrastructure.
2. **Coordinating with Multiple Stakeholders**: Fostering effective communication and coordination among various stakeholders, including governments, property owners, and emergency responders.
3. **Balancing Competing Interests**: Managing competing interests, such as property rights and community needs, to ensure that temporary infrastructure is established in a fair and equitable manner.
4. **Addressing Funding and Resource Constraints**: Identifying innovative funding models and resource allocation strategies to support the development and operation of temporary infrastructure.

By implementing these strategies, vacant urban land can be rapidly transformed into emergency facilities, providing critical support during crises such as epidemics or climate disasters.

### Model: Deepseek-R1-70b

To rapidly transform vacant urban land into emergency facilities during crises, a comprehensive and multi-faceted approach is essential. Here's a structured plan to address the challenge:

1. **Pre-Planning and Identification of Vacant Land:**
 - **Land Assessment:** Cities should proactively identify vacant urban lands suitable for emergency use, evaluating factors such as accessibility, existing infrastructure, and proximity to affected populations.
 - **Emergency Land Use Plans:** Develop plans that outline potential uses for each site, ensuring readiness to adapt during crises without delays.

2. **Governance and Legal Framework:**
 - **Incentivized Agreements:** Establish legal agreements with private landowners, offering incentives like tax breaks or compensation to encourage participation during emergencies.
 - **Streamlined Permits:** Implement fast-track permitting processes to expedite approvals, reducing bureaucratic hurdles during crises.

3. **Funding and Public-Private Partnerships:**
 - **Dedicated Emergency Fund:** Allocate funds specifically for rapid land transformation, ensuring financial readiness.
 - **Partnerships:** Engage with private sectors and NGOs for resources and expertise, fostering collaborative responses to emergencies.

4. **Community Engagement and Communication:**
 - **Public Awareness:** Educate the community about emergency plans through digital platforms, ensuring transparency and support.
 - **Volunteer Management:** Organize volunteers to assist in setup and operation of facilities, enhancing community involvement and response efficiency.

5. **Infrastructure and Technology Solutions:**
 - **Modular Structures:** Utilize prefabricated modules for quick setup of medical centers or shelters.
 - **Repurposing Existing Infrastructure:** Leverage existing structures on vacant land to expedite facility deployment.

6. **Simulation and Testing:**
 - **Regular Drills:** Conduct emergency simulations to test response plans, identifying gaps and areas for improvement.
 - **Post-Crisis Evaluation:** Review each response to refine strategies, incorporating feedback from all stakeholders.

7. **Monitoring and Feedback Mechanisms:**
 - **Continuous Improvement:** Use post-crisis evaluations to enhance future responses, ensuring adaptability and efficiency.
 - **Community Feedback:** Gather insights from affected populations to tailor solutions better to their needs.

8. **Legal and Regulatory Adaptations:**
 - **Temporary Zoning:** Allow flexible zoning changes during emergencies to facilitate quick land repurposing.
 - **Liability Protections:** Establish legal protections to encourage participation without fear of repercussions.

By integrating these strategies, cities can develop a robust system to rapidly respond to emergencies, ensuring timely and effective transformation of vacant land into essential facilities. This approach emphasizes preparation, collaboration, and flexibility, crucial for overcoming challenges in dynamic crisis situations.

### Model: Gemma-3-27b

Okay, I can definitely help you brainstorm and organize thoughts around the topic of **Potential and Governance Mechanisms for Vacant Urban Land as Temporary Infrastructure.** This is a really important and under-explored area, especially given the increasing frequency of crises. Here's a breakdown of how we can approach this, structured to address your points about rapid transformation, challenges, and the gap in research:

**I. Understanding the Potential: Rapid Transformation of Vacant Land**

Let's categorize the *types* of vacant land and their suitability for rapid conversion. This will influence what kind of temporary infrastructure is feasible.

* **Land Types:**
 * **Privately Owned Vacant Lots:** Most common, biggest hurdle for access.
 * **Publicly Owned Vacant Land:** (City, County, State) - Often more readily available, but still requires internal processes. Think abandoned school sites, utility easements, or parks with underutilized space.
 * **Brownfields:** Potentially usable, but remediation needs to be considered (even for temporary use – safety is paramount).
 * **Underutilized Parking Lots:** Excellent for rapid deployment of structures like tents or prefabricated units.
 * **Rights-of-Way:** (Under power lines, along highways) – Limited, but can be used for staging areas or limited shelter.
* **Temporary Infrastructure Examples (and speed of deployment):**
 * **Very Rapid (Hours/Days):**
 * **Shelters:** Large tents, repurposed parking structures (minimal modification).
 * **Staging Areas:** For emergency supplies, equipment, and personnel.
 * **Testing/Vaccination Sites:** Drive-through or walk-up facilities using temporary structures.
 * **Food/Water Distribution Points:** Minimal setup needed.
 * **Rapid (Days/Weeks):**
 * **Temporary Medical Facilities:** Modular/prefabricated units (think expandable hospitals). Requires site preparation (leveling, utilities).
 * **Isolation/Quarantine Centers:** Repurposed buildings (schools, gyms) or quickly constructed modular units.
 * **Field Hospitals:** More complex, requiring significant logistical support.
 * **Medium-Term (Weeks/Months):**
 * **Temporary Housing:** Container homes, pre-fabricated tiny homes. (Requires more planning for utilities & services)

**II. Governance Mechanisms: Overcoming Challenges**

This is the core of your research gap. Here's a breakdown of strategies, grouped by the challenges they address:

* **A. Planning Challenges:**
 * **Pre-Disaster Land Inventory & Assessment:** A GIS-based database of vacant land, including ownership, size, zoning, environmental conditions, and utility access. *This is crucial.*
 * **Pre-Approved "Rapid Deployment" Plans:** For specific land parcels, outlining pre-approved uses, permitting processes, and basic infrastructure requirements. "Trigger" based activation.
 * **Standardized Designs:** For temporary facilities (shelters, medical units) to speed up construction and permitting.
 * **Memoranda of Understanding (MOUs):** With private landowners *before* a crisis, outlining terms for temporary use in emergencies. (See section on property rights).
 * **Flexible Zoning Regulations:** "Emergency Zoning" provisions allowing temporary uses that would normally be prohibited.
* **B. Property Rights Coordination:** *This is the biggest hurdle.*
 * **Emergency Powers Legislation:** Granting authorities temporary powers to access and use private land during declared emergencies (with fair compensation, of course). Needs careful legal drafting.
 * **Liability Waivers & Indemnification Agreements:** Protecting landowners from liability associated with temporary use.
 * **Streamlined Compensation Mechanisms:** Quick and efficient process for compensating landowners for use of their property. Pre-negotiated rates could be helpful.
 * **Public-Private Partnerships:** Land banks or community land trusts can act as intermediaries, facilitating access to land.
 * **"Good Samaritan" Incentives:** Tax breaks or other incentives for landowners who voluntarily offer their land for emergency use.
* **C. Legal Barriers:**
 * **Expedited Permitting Processes:** Waivers or fast-tracking of building permits, environmental reviews, and other regulatory approvals. Pre-approved permits are ideal.
 * **Temporary Use Permits:** Specifically designed for emergency situations, with simplified requirements.
 * **Clarification of Existing Laws:** Identifying and clarifying ambiguities in existing laws that might hinder rapid deployment.
 * **Legal Framework for Reimbursement of Costs:** Defining the process for the government to cover the costs incurred by property owners during the emergency use of their land.
 * **Addressing Environmental Regulations:** A clear process to temporarily waive or modify environmental regulations while ensuring public safety.

**III. Research Gaps & Empirical Analysis – Where You Can Contribute**

You're right to point out the lack of empirical research. Here are some potential research avenues:

* **Case Studies:** Analyze how cities *have* responded to crises and utilized vacant land (even if informally). What worked? What didn't? What were the legal and logistical challenges?
* **Comparative Analysis:** Compare different cities' approaches to emergency preparedness and land use. Identify best practices.
* **Cost-Benefit Analysis:** Evaluate the costs and benefits of different governance mechanisms.
* **Stakeholder Analysis:** Understand the perspectives of landowners, emergency managers, planners, and community members.
* **Develop a "Dynamic Governance Model":** A framework for managing vacant land for temporary infrastructure that is adaptable to different types of crises and local contexts. *This is where you can really make a contribution.* This model needs to address the *timing* of interventions – how do you transition from pre-disaster planning to rapid deployment to post-disaster recovery?


**To help me refine this further, could you tell me:**

* **What kind of crises are you most interested in focusing on?** (Epidemics, Climate Disasters, etc.)
* **Is there a specific geographic area you are interested in studying?** (City, Region, Country)
* **What is the scope of your research?** (Master's Thesis, Doctoral Dissertation, etc.)


I hope this is a helpful starting point. I can help you refine these ideas, suggest relevant literature, or brainstorm specific research questions. Just let me know what you'd like to explore next.

### Model: GPT-4o

To rapidly transform vacant urban land into temporary infrastructure, such as emergency medical centers or shelters, during crises, several strategies can be employed. The key is to address challenges related to planning, property rights coordination, and legal barriers. Here’s a breakdown of potential approaches and governance mechanisms:

### 1. **Flexible Governance and Legal Frameworks**
 - **Temporary Use Permits**: Implementing flexible zoning laws and temporary land use permits can expedite the transformation of vacant land. These permits can allow for quick and temporary repurposing without the lengthy approval processes typically required for permanent construction.
 - **Adaptive Legislation**: Create crisis-responsive legal frameworks that allow for fast-track approvals. This could involve emergency powers granted to local governments to override typical property rights and zoning restrictions when the land is needed for urgent, temporary use.
 - **Predefined Crisis Protocols**: Local governments could develop predefined protocols for land use during crises, including agreements with landowners or operators of vacant properties on how to use their space in emergencies. This would speed up decision-making and reduce the time spent on negotiations.

### 2. **Stakeholder Coordination and Collaboration**
 - **Public-Private Partnerships (PPPs)**: Collaborating with private landowners, developers, and NGOs can facilitate quicker land access and the provision of necessary resources (such as tents, medical supplies, etc.). These partnerships could be established in advance, with memorandums of understanding (MOUs) in place for quick activation.
 - **Land Bank Creation**: Governments could create a land bank for managing vacant and underutilized urban land. This centralized entity would facilitate easier coordination between landowners, local authorities, and emergency service providers.
 - **Community and Local Involvement**: Ensuring that local communities and organizations are involved in decision-making and planning ensures that emergency facilities meet the actual needs of the population and can be quickly mobilized.

### 3. **Rapid Design and Temporary Infrastructure**
 - **Modular Infrastructure**: Pre-fabricated or modular buildings that can be rapidly deployed for medical centers or shelters are critical for speed and flexibility. These structures are often easier and faster to assemble and can be disassembled and relocated after the crisis.
 - **Flexible Design Standards**: Develop flexible building codes that prioritize speed and cost-efficiency over strict adherence to permanent infrastructure standards. These temporary structures should meet basic health, safety, and accessibility needs without the rigidity of long-term construction rules.
 - **Emergency Infrastructure Kits**: Governments or NGOs could stockpile necessary infrastructure materials (e.g., tents, medical equipment, temporary sanitation facilities) in urban centers to allow for rapid setup.

### 4. **Technology and Data-Driven Solutions**
 - **Urban Land Mapping Tools**: Utilize GIS (Geographic Information Systems) and other mapping tools to rapidly identify and assess vacant urban land that could be converted into emergency facilities. This data could be continuously updated to ensure the most appropriate sites are selected based on proximity to population centers, accessibility, and other factors.
 - **Digital Coordination Platforms**: Create a digital platform to coordinate between local authorities, emergency responders, property owners, and service providers. This could allow for real-time updates on available land, infrastructure needs, and available resources during a crisis.

### 5. **Community Preparedness and Resilience**
 - **Pre-established Emergency Plans**: Develop emergency response plans that include the temporary use of vacant land. These plans should outline how vacant land will be quickly transformed into shelters, hospitals, or other emergency infrastructure during a crisis.
 - **Education and Awareness Campaigns**: Educate the public and property owners about the potential for temporary land repurposing during crises. By building trust and understanding, the barriers to cooperation can be reduced.

### 6. **Financing and Incentives**
 - **Government Grants and Subsidies**: Offering financial incentives such as grants or tax breaks to landowners who allow their properties to be used temporarily during emergencies can encourage participation.
 - **Emergency Funds for Quick Response**: Establish emergency response funds that local governments can tap into for the swift development of temporary infrastructure. This could include funds for securing materials, hiring labor, and other immediate needs.

### 7. **Monitoring and Adaptation During the Crisis**
 - **Real-time Monitoring**: During a crisis, continuous monitoring of the emergency facilities is necessary to adapt to changing conditions. This could involve using digital tools to track capacity, resource usage, and the evolving needs of the population.
 - **Post-Crisis Evaluation**: After the crisis, evaluate the success of these temporary uses and adapt governance strategies for future crises. This could involve learning from what worked and what didn’t to improve rapid response mechanisms.

### Conclusion:
Successfully converting vacant urban land into temporary infrastructure during a crisis requires flexibility in governance, quick decision-making, collaboration across stakeholders, and the use of adaptable technologies. By developing legal frameworks, strengthening stakeholder coordination, and investing in adaptable infrastructure, cities can build resilience and respond more effectively to crises like epidemics or climate disasters. The focus should be on pre-crisis planning, adaptability during the crisis, and post-crisis evaluation to ensure that future responses are even more efficient.

These strategies move beyond long-term planning, providing a more dynamic governance approach that allows cities to respond quickly in times of urgent need.

### Model: RAG+Qwen2.5-72b

### Potential of Vacant Urban Land as Temporary Infrastructure

Vacant urban land (VUL) holds immense potential as a resource for developing temporary infrastructure during crises such as epidemics or climate disasters. These sites can be rapidly transformed into emergency facilities like temporary medical centers or shelters, thereby providing crucial support during critical times. Notably, VUL tends to be located in areas with pre-existing infrastructure and connectivity, making them particularly suitable for such adaptive uses.

For instance, during the COVID-19 pandemic, VUL was used to set up drive-through testing sites, vaccination centers, and temporary hospitals. Similarly, in the aftermath of natural disasters, VUL can be utilized for temporary housing or aid distribution centers. The adaptability of VUL makes it a valuable asset in crisis response, allowing urban planners and emergency managers to swiftly deploy essential services where they are needed most.

However, realizing this potential presents significant challenges, particularly in the realms of planning, property rights coordination, and legal barriers. These obstacles can hinder the swift and effective utilization of VUL during emergencies, necessitating innovative governance mechanisms to overcome them.

### Governance Mechanisms and Strategies for Overcoming Challenges

#### 1. Rapid Planning and Coordination

**Establish Pre-crisis Plans and Protocols:** One effective strategy is to develop pre-crisis plans and protocols that identify potential VUL sites and outline steps for their rapid transformation during emergencies. This proactive approach ensures that, when a crisis strikes, there is a clear roadmap for action. These plans can be integrated into broader disaster preparedness strategies, fostering a culture of readiness within urban communities.

**Inter-agency Collaboration:** Another critical aspect of rapid planning is fostering collaboration between various agencies and stakeholders. In the event of a crisis, multiple entities—such as health departments, urban planning authorities, and emergency management teams—must work in tandem. Establishing strong inter-agency relationships and communication channels beforehand can facilitate smoother coordination during emergencies.

**Leverage Technology:** Advanced technology can also play a vital role in rapid planning. Geographic Information Systems (GIS), for example, can be used to identify and map potential VUL sites, while real-time data analytics can provide insights into evolving crisis conditions, enabling more informed decision-making.

#### 2. Property Rights Coordination

**Flexible Land Use Policies:** To address property rights challenges, urban planners can develop flexible land use policies that permit the temporary repurposing of VUL during crises. Such policies can specify the conditions under which VUL can be used for emergency facilities, balancing the immediate needs of the community with the long-term interests of landowners.

**Public-Private Partnerships:** Public-private partnerships can also be instrumental in overcoming property rights hurdles. By collaborating with private landowners, municipalities can secure the use of VUL during emergencies, offering incentives such as tax breaks or rental payments. This collaborative approach fosters a sense of shared responsibility and mutual benefit.

**Community Engagement:** Engaging with local communities is another essential strategy for property rights coordination. By involving community members in the planning process and obtaining their support, urban planners can build consensus around the temporary use of VUL. Transparent communication and active participation can help alleviate concerns and foster trust.

#### 3. Legal Barriers

**Amendments to Building Codes and Zoning Regulations:** To navigate legal barriers, municipalities can amend building codes and zoning regulations to facilitate the rapid deployment of emergency facilities. These amendments can provide exemptions or streamlined processes for temporary structures, reducing bureaucratic hurdles and accelerating implementation.

**Legal Frameworks for Crisis Response:** Establishing legal frameworks specifically designed for crisis response can also help overcome legal barriers. These frameworks can clarify the roles and responsibilities of various stakeholders, establish procedures for land acquisition and use during emergencies, and provide legal protections for those involved in crisis response efforts.

**Legal Advice and Support:** Providing legal advice and support to urban planners and emergency managers can further aid in navigating legal complexities. Legal experts can offer guidance on regulatory compliance, contract negotiation, and dispute resolution, ensuring that emergency response efforts proceed smoothly and legally.

### Conclusion

The potential of VUL as temporary infrastructure during crises is undeniable. By implementing robust governance mechanisms and strategies that address the challenges of planning, property rights coordination, and legal barriers, urban planners can unlock this potential and enhance their cities' resilience. The dynamic governance of temporary functions requires a proactive, collaborative, and adaptable approach, one that leverages the latest technologies and engages all relevant stakeholders. Through such efforts, VUL can be transformed into a powerful tool for crisis response, safeguarding the well-being of urban communities.

### Model: RAG+Llama3.1-70b

The concept of repurposing vacant urban land as temporary infrastructure is an innovative approach to addressing the needs of communities during crises such as epidemics or climate disasters. Here's a detailed analysis of the potential and governance mechanisms for vacant urban land as temporary infrastructure:

**Potential of Vacant Urban Land:**

1. **Rapid Transformation:** Vacant urban land can be rapidly transformed into emergency facilities such as temporary medical centers, shelters, and other essential services. This is particularly useful during crises when time is of the essence, and quick responses are necessary.
2. **Flexibility:** Vacant urban land can be used for a variety of temporary purposes, depending on the specific needs of the community. This flexibility is essential during crises when the needs of the community may change rapidly.
3. **Community Engagement:** The use of vacant urban land for temporary infrastructure can foster community engagement and participation. This can help to build trust and strengthen social bonds within the community.

**Governance Mechanisms:**

1. **Collaborative Governance:** Collaborative governance mechanisms involving multiple stakeholders, including government agencies, community groups, and private sector organizations, can help to facilitate the rapid transformation of vacant urban land into temporary infrastructure.
2. **Temporary Use Permits:** Temporary use permits can be issued to allow for the rapid transformation of vacant urban land into temporary infrastructure. These permits can be designed to be flexible and adaptable to changing circumstances.
3. **Community Land Trusts:** Community land trusts can be established to hold and manage vacant urban land for temporary infrastructure purposes. This can help to ensure that the land is used for the benefit of the community.

**Strategies to Overcome Challenges:**

1. **Streamlined Permitting Processes:** Streamlined permitting processes can help to reduce the time and complexity involved in obtaining permission to use vacant urban land for temporary infrastructure.
2. **Public-Private Partnerships:** Public-private partnerships can be established to provide funding and resources for the rapid transformation of vacant urban land into temporary infrastructure.
3. **Community Outreach and Engagement:** Community outreach and engagement can help to build trust and support for the use of vacant urban land for temporary infrastructure.
4. **Flexible Zoning Regulations:** Flexible zoning regulations can be implemented to allow for the rapid transformation of vacant urban land into temporary infrastructure.

**Empirical Analysis:**

1. **Case Studies:** Case studies of successful temporary infrastructure projects on vacant urban land can provide valuable insights into the governance mechanisms and strategies that were used to overcome challenges.
2. **Surveys and Interviews:** Surveys and interviews with stakeholders involved in temporary infrastructure projects can help to identify best practices and lessons learned.
3. **Data Analysis:** Data analysis can be used to evaluate the effectiveness of temporary infrastructure projects on vacant urban land and identify areas for improvement.

**Conclusion:**

The use of vacant urban land as temporary infrastructure is a promising approach to addressing the needs of communities during crises. By understanding the potential and governance mechanisms for vacant urban land, we can develop strategies to overcome challenges and create more resilient and adaptable communities. Further research is needed to empirically analyze the dynamic governance of temporary functions on vacant urban land and to identify best practices and lessons learned from successful projects.

### Model: RAG+Deepseek-R1-70b

To address the challenge of rapidly transforming vacant urban land into emergency facilities during crises, the following structured approach is proposed:

1. **Preparedness and Planning:**
 - **Contingency Plans:** Develop and maintain contingency plans that include strategies for repurposing vacant land into temporary facilities.
 - **Site Identification:** Pre-identify suitable vacant sites based on criteria like location, accessibility, and environmental suitability.

2. **Streamlined Permissions:**
 - **Legal and Regulatory Streamlining:** Implement special permits or overrides during emergencies to bypass standard zoning and regulatory hurdles.
 - **Pre-Agreements:** Establish pre-agreements with landowners to facilitate quick access to vacant land during crises.

3. **Community Engagement:**
 - **Involvement:** Engage local residents in the planning process to ensure that temporary facilities meet community needs and are socially acceptable.
 - **Participation:** Encourage community participation in the transformation process to foster a sense of ownership and cooperation.

4. **Technology Utilization:**
 - **GIS Mapping:** Use Geographic Information Systems (GIS) to quickly identify and assess potential sites for temporary facilities.
 - **AI and Predictive Analytics:** Employ artificial intelligence to predict where emergencies might require temporary facilities, aiding in rapid decision-making.

5. **Funding and Partnerships:**
 - **Innovative Financing:** Explore innovative financing mechanisms or public-private partnerships to secure resources for rapid transformations.
 - **Resource Allocation:** Ensure that funding is allocated efficiently to cover the costs of transforming and maintaining temporary facilities.

6. **Post-Crisis Planning:**
 - **Reversion Strategies:** Develop plans for reverting the land back to its original state or repurposing it for long-term community benefit after the crisis.
 - **Sustainability:** Consider sustainable practices for the post-crisis use of the land, ensuring it remains an asset to the community.

By implementing these strategies, cities can effectively utilize vacant urban land as temporary infrastructure during emergencies, overcoming challenges related to planning, property rights, and legal barriers. This approach ensures rapid response, community involvement, and sustainable outcomes.

### Model: RAG+Gemma3-27b

To rapidly transform vacant urban land into emergency facilities during crises, a proactive and adaptable approach to planning and governance is essential. Here's a breakdown of potential strategies:

**1. Pre-Crisis Planning & Site Identification:**

* **Vulnerability Assessments:** Conduct thorough vulnerability assessments to identify areas most at risk from various crises (epidemics, climate disasters, etc.).
* **Pre-Identified Sites:** Create a publicly accessible inventory of vacant land suitable for temporary facilities, assessed for factors like accessibility, ground conditions, and proximity to vulnerable populations.
* **Modular Design Templates:** Develop pre-approved, modular designs for temporary facilities (medical centers, shelters, distribution hubs) that can be quickly deployed and adapted to different site conditions.
* **Supply Chain Agreements:** Establish agreements with suppliers for rapid delivery of materials and equipment needed for facility construction.

**2. Streamlined Permitting & Legal Frameworks:**

* **Emergency Declaration Protocols:** Implement clear protocols for declaring an emergency, triggering streamlined permitting processes.
* **Temporary Use Permits:** Develop standardized temporary use permits specifically for emergency situations, reducing bureaucratic hurdles.
* **Pre-Negotiated Access Agreements:** Establish pre-negotiated agreements with landowners allowing temporary access to vacant land in exchange for fair compensation or tax incentives.
* **Emergency Powers Legislation:** Clarify the legal authority of local governments to temporarily utilize private property during emergencies, ensuring due process and fair compensation.

**3. Governance & Coordination:**

* **Central Coordinating Body:** Create a dedicated emergency response team within the city planning department or a multi-agency task force responsible for coordinating the transformation of vacant land.
* **Stakeholder Engagement:** Involve landowners, community groups, emergency responders, and healthcare providers in the planning process.
* **GIS Mapping & Data Management:** Utilize GIS to map vacant land, assess suitability, and track the progress of facility construction.
* **Communication Plan:** Develop a clear communication plan to inform the public about the use of vacant land for emergency facilities.

**4. Rapid Deployment & Construction:**

* **Modular Construction:** Prioritize the use of modular or pre-fabricated building components for quick assembly.
* **Mobile Medical Units:** Utilize mobile medical units that can be rapidly deployed to vacant land sites.
* **Volunteer Networks:** Establish volunteer networks to assist with construction, logistics, and facility operation.

**5. Addressing the Lack of Empirical Analysis:**

* **Pilot Programs:** Implement pilot programs to test different approaches to utilizing vacant land for emergency facilities.
* **Data Collection & Evaluation:** Collect data on the effectiveness of these programs, including time to deployment, cost, and community impact.
* **Case Study Analysis:** Analyze case studies of successful (and unsuccessful) temporary infrastructure projects in other cities.
* **Adaptive Management:** Continuously refine strategies based on data and lessons learned.

**Overcoming Challenges:**

* **Property Rights:** Transparent communication and fair compensation are crucial for securing landowner cooperation.
* **Funding:** Secure dedicated funding streams for emergency preparedness and rapid deployment of temporary facilities.
* **Community Concerns:** Address community concerns about noise, traffic, and potential disruption through proactive communication and mitigation measures.


By implementing these strategies, cities can significantly enhance their capacity to rapidly respond to crises and protect their populations. The key is to move beyond long-term planning and embrace a dynamic, adaptable approach to governance and land use.

### Model: RAG+GPT-4o

Transforming vacant urban land into temporary infrastructure during crises requires a proactive and strategic approach. Here's a comprehensive guide on how this can be achieved:

**1. Pre-Crisis Preparedness:**
 - **Site Identification:** Conduct an inventory of vacant urban land, assessing suitability for emergency facilities based on location, size, accessibility, and environmental conditions.
 - **Modular Infrastructure Plans:** Develop designs for modular, prefabricated structures that can be quickly assembled on-site for use as medical centers, shelters, or distribution hubs.
 - **Resource Agreements:** Establish agreements with suppliers for rapid procurement of necessary materials and equipment for temporary facilities.

**2. Streamlined Regulations and Permitting:**
 - **Emergency Protocols:** Implement protocols for emergency declarations that trigger streamlined regulatory and permitting processes.
 - **Pre-Approved Permits:** Develop pre-approved permits for temporary land use in emergencies, minimizing bureaucratic delays.
 - **Legal Frameworks:** Create legal frameworks allowing governments to temporarily utilize private property during emergencies with fair compensation and clear terms.

**3. Property Rights and Coordination:**
 - **Pre-Negotiated Access:** Work with landowners to establish pre-negotiated agreements that allow temporary access in exchange for incentives or compensation.
 - **Community Land Trusts:** Consider establishing land trusts that can hold and manage vacant land for emergency use.
 - **Collaborative Planning:** Engage stakeholders, including landowners, community groups, and emergency services, in collaborative planning and decision-making processes.

**4. Rapid Deployment and Construction:**
 - **Modular and Prefabricated Solutions:** Use modular construction techniques for rapid deployment of facilities such as medical centers and shelters.
 - **Mobile Units:** Employ mobile medical and logistical units that can be quickly transported and set up on vacant land.
 - **Volunteer Engagement:** Mobilize volunteers and community organizations to assist with the setup and operation of temporary facilities.

**5. Governance and Coordination:**
 - **Centralized Command Structure:** Establish a centralized command structure within municipal governments to oversee the transformation of vacant land during crises.
 - **Interagency Collaboration:** Foster collaboration between government agencies, non-profits, and private sector partners to ensure coordinated responses.
 - **Public Communication:** Develop a communication strategy to keep the public informed about the use of vacant land for emergency purposes.

**6. Post-Crisis Review and Adaptation:**
 - **Evaluation:** Conduct a post-crisis evaluation to assess the effectiveness of temporary infrastructure and identify areas for improvement.
 - **Adaptive Management:** Use lessons learned to refine protocols, agreements, and strategies for future crises.
 - **Sustainability Planning:** Explore opportunities to transition temporary facilities into permanent community assets post-crisis.

**Challenges and Considerations:**
 - **Data and Mapping:** Utilize Geographic Information Systems (GIS) to map vacant land and assess its suitability for temporary use.
 - **Ethical Concerns:** Address ethical considerations related to property rights and community impact.
 - **Funding and Resources:** Secure adequate funding and resources for rapid deployment and operation of temporary infrastructure.

By implementing these strategies, cities can effectively leverage vacant urban land as temporary infrastructure during crises, overcoming challenges in planning, property rights, and legal barriers. This proactive approach ensures that communities are better prepared to respond to emergencies and recover more quickly.

## TOPIC2: Community Perception Thresholds: Idle Duration of Vacant Land.

## -How long must vacant land remain unused before residents begin to perceive it as “abandoned” rather than holding potential?

## -Are there significant differences in tolerance toward vacant land among communities with different cultural backgrounds?

### Model: Qwen2.5-7b

### Topic 2: Community Perception Thresholds: Idle Duration of Vacant Land

#### Introduction
The perception of vacant land within a community can significantly influence local dynamics, including property values, neighborhood safety, and overall quality of life. The duration for which land remains unused before residents perceive it as "abandoned" rather than holding potential varies widely among different communities. This topic explores the thresholds at which this perception shifts and whether there are significant differences in tolerance toward vacant land among communities with varying cultural backgrounds.

#### Factors Influencing Perception Thresholds

1. Community Norms and Values:
- Urban vs. Rural Communities: Urban areas often have higher population densities, leading to quicker perceptions of abandonment due to the constant presence of people and activity. In contrast, rural areas might take longer for residents to perceive land as abandoned.
- Cultural Backgrounds: Different cultures may have varying expectations regarding property use and community engagement. For example, in some collectivist societies, there might be a higher tolerance for vacant land if it is seen as part of communal resources.

2. Economic Conditions:
- Economic prosperity can influence how quickly residents perceive land as abandoned. In economically stable areas, residents may have more patience with vacant land, whereas in economically strained areas, the perception of abandonment could occur sooner due to increased pressure for development and employment opportunities.

3. Local Policies and Regulations:
- Local zoning laws, building codes, and other regulations can impact how quickly land is perceived as abandoned. For instance, strict regulations might lead to quicker perceptions if compliance with these rules is not maintained.

4. Historical Context:
- Historical events or economic booms and busts in a community can shape residents' expectations about the use of vacant land. Communities that have experienced rapid development followed by decline may be more tolerant of vacant land.

#### Tolerance Toward Vacant Land Among Different Cultural Backgrounds

1. Collectivist vs. Individualist Cultures:
- In collectivist cultures, such as those found in many Asian societies, there might be a higher tolerance for vacant land if it is seen as part of communal resources or if the community collectively decides to wait for an appropriate use.
- In individualist cultures, like those in Western countries, residents may have lower patience with unused land and push for quicker development.

2. Urban vs. Rural Cultures:
- Urban residents might be more accustomed to seeing vacant lots as temporary placeholders for future developments or public spaces, whereas rural communities might perceive such land as a loss of productive capacity.

3. Religious and Social Beliefs:
- Religious beliefs can also play a role in how communities view unused land. For example, some religious groups may see certain lands as sacred or reserved for specific purposes.

#### Research Methods

1. Surveys and Interviews:
- Conducting surveys and interviews with community members to understand their perceptions of vacant land.

2. Case Studies:
- Analyzing case studies from different communities with varying cultural backgrounds to identify common themes and unique factors influencing perception thresholds.

3. Statistical Analysis:
- Using statistical methods to analyze data collected through surveys, interviews, and other research tools to identify significant differences in tolerance toward vacant land among different communities.

#### Conclusion

The perception of vacant land as "abandoned" rather than holding potential varies significantly across different communities based on cultural backgrounds, economic conditions, local policies, and historical contexts. Understanding these factors can help policymakers and community leaders develop more effective strategies for managing vacant lands to enhance neighborhood stability and improve overall quality of life.

By recognizing the diverse perceptions and thresholds within different communities, stakeholders can tailor their approaches to address issues related to vacant land in a way that is sensitive to local values and expectations.

### Model: Llama3.1-8b

What a fascinating topic! Let's dive into the concept of community perception thresholds and explore how they relate to the idle duration of vacant land.

Defining Community Perception Thresholds

Community perception thresholds refer to the point at which residents begin to perceive a vacant lot as abandoned, rather than seeing it as an opportunity for development or reuse. This threshold is influenced by various factors, including cultural background, socioeconomic status, and community norms.

Factors Influencing Perceived Abandonment

Several factors contribute to the perceived abandonment of vacant land:

1. Duration of vacancy: The longer a property remains vacant, the more likely residents are to perceive it as abandoned.
2. Physical condition: Vacant properties that appear neglected or in disrepair are more likely to be seen as abandoned than those that are well-maintained.
3. Community context: Residents' perceptions of abandonment can vary depending on their cultural background, socioeconomic status, and community norms.
4. Local policies and regulations: Zoning laws, building codes, and other regulations can influence how residents perceive vacant land.

Cultural Differences in Tolerance Toward Vacant Land

Research suggests that tolerance toward vacant land varies across cultures:

1. Latin American communities: In some Latin American countries, vacant lots are often seen as opportunities for community gardens or informal housing.
2. African American communities: In some African American neighborhoods, vacant properties may be perceived as a sign of disinvestment and neglect.
3. Asian communities: In some Asian cultures, vacant land is often viewed as a potential site for redevelopment or reuse.

Implications for Urban Planning and Community Development

Understanding community perception thresholds can inform urban planning and community development strategies:

1. Community engagement: Engaging with residents to understand their perceptions of vacant land can help identify opportunities for collaborative problem-solving.
2. Vacant land reuse initiatives: Implementing programs that encourage the reuse or redevelopment of vacant properties can help mitigate perceived abandonment.
3. Cultural sensitivity: Urban planners and developers should be aware of cultural differences in tolerance toward vacant land to ensure that their strategies are effective and respectful.

By acknowledging and addressing community perception thresholds, urban planners and developers can work towards creating more inclusive and vibrant communities.

### Topic 2: Community Perception Thresholds: Idle Duration of Vacant Land

#### Introduction
Community perception plays a crucial role in the redevelopment of vacant urban land. The threshold at which residents begin to perceive vacant land as "abandoned" rather than holding potential is a critical factor in determining its reuse and redevelopment.

### Factors Influencing Perception Thresholds

1. Idle Duration:
- Research suggests that idle duration significantly affects community perception, with shorter idle periods often associated with higher tolerance.
- The exact threshold varies among communities but generally falls within the range of 2-5 years.

2. Cultural Background:
- Studies indicate significant differences in tolerance toward vacant land among communities with different cultural backgrounds.
- For instance:
 - In some cultures, such as those with a strong emphasis on community and collective ownership (e.g., African or Indigenous), longer idle periods may be tolerated due to a focus on communal rather than individual property rights.
 - In other cultures, like those emphasizing economic efficiency (e.g., Anglo-Saxon or Germanic), shorter idle durations are often preferred.

3. Social Cohesion:
- Communities with higher social cohesion tend to exhibit greater tolerance toward vacant land, viewing it as a potential asset rather than an eyesore.
- Conversely, communities with lower social cohesion may perceive vacant land as abandoned more quickly.

4. Economic Factors:
- Economic conditions significantly influence community perception of vacant land.
- In areas experiencing economic downturns or poverty, residents may view vacant land as an opportunity for development and job creation.

### Case Study Examples

1. Detroit's Vacant Land Initiative:
- Detroit's experience highlights the importance of community engagement in transforming vacant land into productive assets.
- By engaging with local residents and incorporating their perspectives, the city was able to reclaim thousands of acres of vacant land for gardens, parks, and other community-focused projects.

2. Medellín's Urban Regeneration:
- Medellín's urban regeneration efforts demonstrate how cultural background influences perception thresholds.
- The city's strong focus on collective ownership and social cohesion contributed to its ability to transform abandoned neighborhoods into vibrant public spaces.

### Conclusion
Community perception thresholds play a crucial role in the redevelopment of vacant urban land. Understanding these factors can help policymakers, developers, and community leaders design more effective strategies for transforming idle land into productive assets that align with local values and needs.

If you'd like to explore specific case studies or discuss strategies for addressing cultural differences in community perception, feel free to ask!

### Model: Deepseek-R1-7b

The perception of vacant land as "abandoned" varies significantly across different communities and is influenced by several factors:

1. Definition of Abandonment: Abandoned land is often perceived when it becomes unusable for its intended purpose, leading to a decline in community value and potential issues like tax impacts.

2. Cultural Influences: Cultural values play a crucial role. In some communities, environmental preservation might lead to quicker abandonment due to overgrown land, while others may prioritize property maintenance, delaying the perception of abandonment.

3. Economic Factors: Financial pressures, such as local property taxes, can accelerate the perception of abandonment in affluent areas where tax burden is significant.

4. Regulations and Laws: Local regulations might legally mark land as abandoned after a set period, which varies by city and can influence public perception.

5. Community Values and Responsibility: Individual responsibility for maintaining property affects how quickly it's perceived as abandoned. Communities with high maintenance standards may take longer to notice decay.

6. Examples Across Cities: Different cities exhibit varying thresholds based on their specific regulations, cultural norms, and economic conditions.

In conclusion, the threshold for perceiving vacant land as abandoned is context-dependent, influenced by local laws, cultural values, community attitudes towards property care, and economic factors. Each community has its unique dynamics shaping this perception.

### Model: Gemma3-4b

Okay, let’s tackle Topic 2: Community Perception Thresholds – Idle Duration of Vacant Land. This is a crucial, often overlooked element in understanding the long-term impact of vacancy and how it’s framed by communities. It’s about moving beyond simply measuring *duration* and recognizing the subjective, culturally-influenced factors at play.

**1. Establishing Perception Thresholds – The “Abandonment” Point:**

* **No Fixed Timeline:** There’s no single, universally applicable timeline. The “abandonment” point is highly context-dependent. However, research suggests a general range:
 * **Short-Term (0-1 year):** Often viewed as temporary – construction delays, economic downturns, or simply “awaiting redevelopment.”
 * **Medium-Term (1-5 years):** This is where perceptions start to shift significantly. Residents begin to associate the land with negative connotations – crime, blight, decay.
 * **Long-Term (5+ years):** At this point, the land is almost universally perceived as “abandoned,” regardless of its potential.
* **Indicators Beyond Duration:** It’s not just *how long* it’s vacant, but *what’s happening* around it that matters. A vacant lot surrounded by thriving businesses and active residents will be perceived differently than one in a neglected neighborhood.

**2. Cultural Variations in Tolerance Towards Vacant Land:**

This is where the research becomes incredibly complex and potentially insightful. There are demonstrable differences, heavily influenced by cultural norms and values:

* **Individualistic Cultures (e.g., North America, Western Europe):** Tend to prioritize private property rights and a ‘hands-off’ approach to public land. Longer periods of vacancy are more readily tolerated, often framed as a matter of individual property owner’s choices. There’s a stronger emphasis on ‘clean up on Aisle Five’ – a drive to quickly resolve perceived issues.
* **Collectivist Cultures (e.g., East Asia, parts of Latin America):** Often have a stronger sense of communal responsibility and a greater acceptance of “brownfield” or “blighted” areas as part of the urban fabric. There may be a belief that the government or community has a greater obligation to address the situation, even if it takes longer.
* **Indigenous Communities:** Cultural perspectives on land ownership and stewardship can vary dramatically. In some cases, a period of “rest” or “natural regeneration” on a piece of land might be considered a positive thing, rather than a sign of abandonment.
* **Religious Influences:** Religious beliefs about stewardship and the care of property can also play a role.

**3. Research Methodological Considerations:**

* **Qualitative Research is Key:** Surveys alone won’t cut it. Ethnographic research – interviews, focus groups, participant observation – is crucial to understanding the nuanced perceptions of local communities.
* **Cultural Mapping:** Developing “cultural maps” that overlay demographic data with information about local values and attitudes toward land use.
* **Historical Context:** Understanding the historical development of the area – past industrial uses, patterns of land ownership, and previous attempts at redevelopment – can shed light on current perceptions.

**4. Potential Research Questions:**

* What are the key narratives and metaphors that residents use to describe vacant land?
* How do residents’ perceptions of vacant land relate to their sense of place and identity?
* What factors influence residents’ willingness to support redevelopment efforts?
* Are there specific cultural practices or rituals associated with vacant land?

**5. Connecting to Existing Research (Context 1 & 3):**

* **Context 1** highlights the tendency to frame vacant land negatively, reinforcing the “wasteful” perception. Understanding *why* this happens – the cultural biases – is critical.
* **Context 3** demonstrates the importance of community engagement and designing spaces that align with local values. However, it also underscores the need for a deeper understanding of the underlying cultural factors.

To help me refine this discussion further, could you tell me:

* Are you particularly interested in exploring a specific cultural context (e.g., a particular city, region, or ethnic group)?
* Are there specific research methods you’d like to discuss (e.g., ethnography, semi-structured interviews)?

### Model: GPT-4o-mini

The perception of vacant land can significantly vary based on the duration it remains unused and the cultural context of the surrounding community. Here are some insights on both aspects of your inquiry:

### Idle Duration and Perception of Abandonment

1. Perception Timeframe: Research indicates that the threshold for perceiving vacant land as “abandoned” often lies between 6 months to 2 years. After this period, the community may start to associate the land with neglect and decline rather than potential development.

2. Indicators of Abandonment: Beyond time, several factors may influence perception, including the condition of the land (overgrown vegetation, litter accumulation), surrounding development, and social factors (increased crime or homelessness in the area).

3. Psychological Attachment: The longer residents observe a site as unused, the more likely they are to develop psychological associations of abandonment. This can prompt a sense of loss or frustration, especially if the land is seen as a missed opportunity for development or community use.

### Cultural Differences in Perception

1. Cultural Background: Different cultural communities can perceive vacant land through diverse lenses based on values, experiences, and historical context. For example, communities that prioritize collective ownership or community space may view vacant land as a potential cultural or communal resource, fostering patience for its development.

2. Urban vs. Rural Perspectives: Urban areas often have less tolerance for prolonged vacancy due to high demand for space and population density, while rural communities may be more accepting of vacant land, seeing it as part of the landscape or as potential future opportunities, depending on their economic conditions.

3. Socioeconomic Factors: Economic disparities among communities can greatly influence perceptions. In economically disadvantaged areas, vacant land may evoke concern for safety and reflect broader systemic issues, whereas, in affluent neighborhoods, it may be seen as an investment opportunity or a space for community initiatives.

4. Historical Context: Communities with histories of urban renewal, gentrification, or displacement may have heightened sensitivities toward vacant land, interpreting it as a precursor to potential further instability or loss of cultural identity.

### Implications for Community Planning

- Engagement Strategies: To address community concerns and perceptions, a participatory approach is essential. Engaging residents in discussions about vacant land can help shift perceptions from abandonment to potential, emphasizing community ownership of the space.

- Adaptive Reuse Opportunities: Initiatives that temporarily or permanently activate vacant land (such as community gardens, pop-up markets, or art installations) can reshape perceptions, demonstrating the land’s potential and mitigating feelings of abandonment.

- Cultural Competence: Understanding the cultural backgrounds and historical contexts of communities is vital for planning interventions that honor local sentiments and aspirations regarding vacant land.

In conclusion, the intersection of idle duration and cultural perception plays a crucial role in how vacant land is regarded within communities. Policymakers and urban planners should recognize these dynamics to cultivate more effective strategies for revitalizing and utilizing these spaces.

### Model: Qwen-2.5-72b

### Community Perception Thresholds: Idle Duration of Vacant Land

#### Introduction
Vacant land is a common feature in many communities, and its perception can vary widely depending on how long it remains unused. When vacant land is perceived as "abandoned" rather than holding potential, it can lead to a range of negative outcomes, including decreased property values, increased crime, and reduced community well-being. This topic explores the duration after which vacant land is typically perceived as abandoned and whether there are significant differences in tolerance levels among communities with different cultural backgrounds.

#### Key Questions
1. **How long must vacant land remain unused before residents begin to perceive it as “abandoned”?**
2. **Are there significant differences in tolerance toward vacant land among communities with different cultural backgrounds?**

#### Literature Review
- **Perception of Vacant Land**: Studies have shown that the perception of vacant land can shift from "holding potential" to "abandoned" over time. Factors such as maintenance, community engagement, and the presence of signs of neglect (e.g., overgrown vegetation, debris) play a significant role in this perception.
- **Cultural Differences**: Cultural background can significantly influence how communities perceive and tolerate vacant land. For example, some cultures may place a higher value on communal spaces and may be more proactive in maintaining them, while others may have a higher tolerance for idle land.

#### Research Findings
1. **Duration of Abandonment Perception**:
 - **Short-Term (0-6 months)**: In many communities, vacant land that remains unused for 3-6 months can start to be perceived as abandoned, especially if it shows signs of neglect.
 - **Medium-Term (6-12 months)**: By 6-12 months, the perception of abandonment becomes more widespread, and negative impacts on the community can become more pronounced.
 - **Long-Term (12+ months)**: After 12 months, vacant land is almost universally perceived as abandoned, and the community's sense of neglect and disinvestment is heightened.

2. **Cultural Differences in Tolerance**:
 - **Collectivist Cultures**: In collectivist cultures, where community well-being is highly valued, there is often a lower tolerance for vacant land. Community members may be more likely to take collective action to repurpose or maintain the land.
 - **Individualist Cultures**: In individualist cultures, there may be a higher tolerance for vacant land, as individuals are more likely to focus on their personal property and may be less concerned about the state of communal spaces.
 - **Urban vs. Rural Communities**: Urban communities may have a lower tolerance for vacant land due to higher population density and the greater visibility of neglected spaces. Rural communities may have a higher tolerance, as vacant land is more common and less likely to be perceived as a problem.

#### Case Studies
- **Case Study 1: Detroit, USA**: Detroit has faced significant challenges with vacant land due to economic decline. Community initiatives have shown that even small-scale efforts to maintain and repurpose vacant land can significantly change perceptions and improve community well-being.
- **Case Study 2: Tokyo, Japan**: In Tokyo, vacant land is often quickly repurposed or maintained due to the high value placed on communal spaces and the efficient use of land. Community gardens and small parks are common, and there is a low tolerance for neglected spaces.

#### Implications for Policy and Practice
- **Community Engagement**: Engaging community members in the maintenance and repurposing of vacant land can prevent the perception of abandonment and promote a sense of ownership and pride.
- **Cultural Sensitivity**: Policies and initiatives should be culturally sensitive and tailored to the specific needs and values of the community. For example, collectivist cultures may benefit from community-led projects, while individualist cultures may require more individual incentives.
- **Regular Maintenance**: Regular maintenance of vacant land, even if it is not immediately repurposed, can prevent the perception of abandonment and maintain community well-being.

#### Conclusion
The perception of vacant land as abandoned is a complex issue that is influenced by the duration of vacancy and cultural background. Communities with collectivist values and higher population densities tend to have a lower tolerance for vacant land. Understanding these factors can help policymakers and community leaders develop effective strategies to maintain and repurpose vacant land, thereby improving community well-being and preventing the negative impacts of abandonment.

### Model: Llama-3.1-70b

Community Perception Thresholds: Idle Duration of Vacant Land is an intriguing topic. I'll provide some insights and possible answers to your questions.

**Perception Thresholds:**

The duration it takes for residents to perceive vacant land as "abandoned" rather than holding potential can vary significantly depending on several factors, including:

1. **Location and zoning regulations**: In areas with strict zoning laws, residents might perceive vacant land as "abandoned" sooner, as they expect development to occur within a certain timeframe. In contrast, areas with more lenient regulations might have a longer threshold.
2. **Community characteristics**: Urban, suburban, or rural areas have different expectations regarding land use. For example, urban residents might be more accustomed to seeing vacant land redeveloped quickly, while rural residents might be more patient.
3. **Economic conditions**: In areas with a high cost of living or strong economic growth, residents might expect vacant land to be developed quickly to meet demand. In areas with slower economic growth, the perception threshold might be longer.
4. **Cultural background**: As you mentioned, cultural background can play a significant role in shaping community perception. For instance, some cultures might view vacant land as an opportunity for community gardening or public art, while others might see it as a sign of neglect.

**Cultural Background Differences:**

Research suggests that cultural background can influence community perception of vacant land. For example:

1. **Collectivist vs. individualist cultures**: In collectivist cultures, community members might be more likely to view vacant land as a shared resource, rather than individual property. This could lead to a longer perception threshold, as community members might be more willing to wait for collective decisions or community-led development.
2. **Time orientation**: Cultures with a short-term time orientation (e.g., Western societies) might perceive vacant land as "abandoned" sooner than cultures with a long-term time orientation (e.g., some Indigenous cultures).
3. **Relationship with nature**: Cultures that place a strong emphasis on natural environments and conservation might view vacant land as an opportunity for green spaces or wildlife habitats, rather than a sign of neglect.

**Studies and Examples:**

While there isn't a single, definitive study on the topic, research on community perception of vacant land provides some valuable insights:

1. A study in Detroit, Michigan, found that residents perceived vacant land as "abandoned" when it remained unused for around 2-5 years. However, this timeframe varied depending on community characteristics and zoning regulations.
2. Research in Japan found that community-led initiatives to revitalize vacant land were more successful when residents shared a collectivist cultural background and viewed the land as a shared resource.

**Conclusion:**

The duration it takes for residents to perceive vacant land as "abandoned" rather than holding potential varies significantly depending on community characteristics, cultural background, and economic conditions. Understanding these factors can help policymakers, developers, and community leaders work together to revitalize vacant land and promote sustainable development.

While there isn't a one-size-fits-all answer, studies suggest that community-led initiatives, flexible zoning regulations, and a focus on community engagement can help reduce the perception threshold and promote positive perceptions of vacant land.

### Model: Deepseek-R1-70b

The perception of vacant land as "abandoned" rather than holding potential varies significantly across different communities, influenced by a variety of factors:

1. **Location and Context**:
 - Urban areas with high development pressure may perceive land as abandoned faster than rural areas where development is slower.
 - In thriving economic environments, impatience with vacancies is higher, while economically struggling areas may be more tolerant.

2. **Cultural Influences**:
 - Collectivist cultures might be more patient with undeveloped land, prioritizing community needs, whereas individualistic societies may push for quicker development.
 - Cultural values and historical significance can also influence perception, with some communities valuing vacant land for non-economic reasons.

3. **Economic Factors**:
 - Economic prosperity can heighten expectations for development, reducing tolerance for vacancies, while resource-limited areas may be more understanding.

4. **Land History**:
 - Long-term vacancies may become normalized, whereas sudden vacancies, such as post-disaster, might be viewed as abandoned sooner.

5. **Policy and Governance**:
 - Strict regulations can lead to longer vacancies being more accepted, whereas areas with less regulation may see faster development and quicker perception of abandonment.

6. **Urban vs. Rural Settings**:
 -Urban land's higher value may highlight potential, whereas rural abundance may normalize longer vacancies.

In conclusion, the threshold for perceiving land as abandoned is highly contextual, varying based on cultural, economic, historical, and policy-related factors. There is no fixed duration, but understanding these influences can explain the differing tolerances across communities.

### Model: Gemma-3-27b

Okay, I can definitely help you explore the topic of Community Perception Thresholds related to the idle duration of vacant land. This is a fascinating area with a lot of nuance! Here's a breakdown of information, considering both timeframes and cultural differences, presented as if I'm assisting you with research. I'll organize it into sections for clarity.

**I. Understanding the Perception Shift: From Potential to Abandonment**

The shift in perception from "potential future use" to "abandoned problem" isn't a fixed timeframe. It's influenced by a *lot* of factors. However, research and anecdotal evidence point to some common thresholds:

* **Short-Term (Under 6 Months):** Generally, land vacant for under 6 months isn't typically perceived as abandoned. It's usually assumed to be temporary – perhaps between ownership, preparing for construction, or seasonal use. Minimal negative perception.
* **Medium-Term (6 Months - 2 Years):** This is the grey area. Perception starts to shift. Residents begin to wonder about the land's future. Increased scrutiny begins. Concerns may arise depending on the land's condition (see factors below). This is where community engagement *can* be crucial to manage expectations.
* **Long-Term (2+ Years):** After two years of consistent vacancy, the land is *much* more likely to be perceived as abandoned. Negative perceptions solidify. Residents often associate it with blight, safety concerns, and declining property values. Calls for action (code enforcement, redevelopment) will likely increase.
* **Beyond 5 Years:** Generally seen as a definite problem. Strong negative perceptions are almost guaranteed. Often leads to proactive community efforts to address the situation.

**Important Factors Influencing These Timelines:**

* **Land Condition:** This is *huge*.
 * **Well-maintained (mowed grass, security measures):** Perception of abandonment is delayed, even with longer vacancy. Shows active ownership and intent.
 * **Poorly maintained (overgrown weeds, trash accumulation, illegal dumping):** Accelerates the perception of abandonment, even with shorter vacancy.
 * **Signs of previous activity (foundation remnants, old landscaping):** Can suggest potential and delay negative perceptions.
* **Surrounding Land Use:**
 * **Residential Areas:** Tolerance for vacancy is *lower*. Residents are more sensitive to potential blight and safety concerns.
 * **Industrial/Commercial Areas:** Higher tolerance, especially if zoning allows for a range of future uses.
 * **Transitional Zones:** Perception is more complex and depends on the specific context.
* **Local Economic Conditions:** In booming economies, people may be more patient, anticipating eventual development. In struggling economies, vacancy is seen as a sign of further decline.
* **Zoning Regulations:** Clear zoning and transparent development plans can maintain a perception of potential, even with long-term vacancy.
* **Community Knowledge:** If the community knows *why* the land is vacant (e.g., awaiting a major infrastructure project, family estate planning), tolerance is higher.

**II. Cultural Differences in Tolerance**

This is where it gets really interesting, and where generalizations are difficult, but patterns emerge:

* **Collectivist Cultures (e.g., many East Asian, Latin American, African cultures):** Often place a greater emphasis on community aesthetics and collective well-being. Vacant, unmaintained land is more likely to be seen as a negative reflection on the entire community, leading to quicker perceptions of abandonment and a stronger desire for immediate action. There may be a stronger emphasis on communal land use and a less individualistic view of property rights.
* **Individualistic Cultures (e.g., North American, Western European):** Tend to have a stronger emphasis on private property rights and individual freedom. There *may* be a slightly higher tolerance for long-term vacancy, as long as it doesn't directly impact neighboring properties. However, this varies greatly within these cultures.
* **Rural vs. Urban:** Regardless of broader cultural background, *rural* communities often have a different relationship with land. Long-term fallow fields are more accepted as part of a natural cycle. *Urban* communities generally have lower tolerance for vacancy due to space constraints and higher land values.
* **Historical Context:** Communities with histories of land scarcity or displacement may be particularly sensitive to vacant land. Conversely, communities with a history of agricultural land use may have a more nuanced view.
* **Immigrant Communities:** May bring different cultural norms regarding land use and maintenance. Understanding these norms is vital for effective community engagement.

**Examples to illustrate cultural differences (these are broad generalizations and should be treated as such):**

* **Japan:** Historically, maintaining even small patches of land is seen as a civic duty. Vacant land is often quickly converted to small gardens or community spaces.
* **Latin America:** Vacant lots can quickly become informal gathering places or small urban farms, reflecting a strong emphasis on community use of space.
* **United States:** Tolerance varies widely, but often there's a "wait and see" approach, especially if the land is privately owned.

**III. Resources for Further Research:**

* **Urban Land Institute (ULI):** [https://uli.org/](https://uli.org/) – Offers reports and case studies on vacant land.
* **Local Government Websites:** Search for city/county planning departments for information on vacant land initiatives.
* **Academic Databases:** (JSTOR, Google Scholar) Search for keywords like "vacant land perception," "urban blight," "community aesthetics," and "cultural land use."
* **Community Land Trusts:** Explore how these organizations address vacant land issues. ([https://www.cltnetwork.org/](https://www.cltnetwork.org/))

**To help me tailor information to *your* specific needs, could you tell me:**

* **What specific community are you researching?** (even a general location helps)
* **What is the context of this research?** (e.g., are you a planner, a researcher, a resident?)
* **Are you looking for information on specific types of vacant land?** (e.g., residential lots, industrial sites)

I hope this detailed response is a helpful starting point! Let me know how I can assist you further.

### Model: GPT-4o

The perception of vacant land as "abandoned" or "holding potential" can vary significantly depending on several factors, including the duration of vacancy, the cultural context of the community, and the intended use of the land. The key factor in determining when residents begin to perceive vacant land as "abandoned" is often the duration of inactivity and its apparent neglect. However, tolerance toward vacant land can also differ across communities, influenced by cultural attitudes, economic conditions, and social expectations.

### Key Factors Influencing Perception:

1. **Duration of Vacancy:**
 - **Short-term vacancy (a few months to a year):** Often viewed as a temporary state, with the expectation that the land will be developed or repurposed soon. The land may still be seen as holding potential for future projects or development.
 - **Long-term vacancy (several years or more):** Once a vacant lot remains unused for a prolonged period, it is more likely to be perceived as abandoned. This shift in perception may occur after a few years, especially if there is no visible activity or indication of plans for development.

2. **Maintenance and Condition of the Land:**
 - The condition of the land plays a crucial role in shaping perceptions. Land that is neglected—overgrown with weeds, littered with trash, or otherwise poorly maintained—tends to be viewed as abandoned. In contrast, well-maintained vacant lots, even if unused, are more likely to be perceived as holding potential.

3. **Cultural Differences:**
 - **Urban vs. Rural Communities:** In urban areas, where space is at a premium, vacant land may be quickly perceived as "wasted" or "abandoned" because the expectation for land use is often higher. In rural areas, vacant land may be more accepted as simply unutilized, with less pressure to develop it immediately.
 - **Cultural Perceptions of Space:** In cultures where land ownership and development are seen as symbols of progress or economic success, vacant land may be quickly labeled as abandoned if it is not actively used or developed. In contrast, cultures with a more relaxed attitude toward land use may tolerate vacant spaces longer without negative perceptions.

4. **Community Involvement and Engagement:**
 - Communities with strong ties to local governance and active participation in urban planning may be more likely to tolerate vacant land, particularly if there are known plans for development. Conversely, in areas with lower community engagement, the same land may be more likely to be perceived as abandoned if there is no visible activity.

5. **Economic and Political Factors:**
 - In economically disadvantaged areas, vacant land may be viewed with frustration, as the absence of development might be seen as a sign of neglect or lack of opportunity. In wealthier or gentrifying areas, vacant land might hold a different kind of potential and be viewed more as an opportunity for future investment, possibly leading to a more optimistic perception.

### Conclusion:
The threshold at which vacant land is perceived as "abandoned" versus holding "potential" can vary based on the duration of vacancy, maintenance, and the community’s cultural and economic context. In communities with strong development expectations, long-term vacancy could quickly lead to a negative perception. In other communities, cultural factors or local economic conditions may allow for a more tolerant view of vacant land for extended periods.

Would you like to dive deeper into a specific community type or cultural perspective regarding this topic?

### Model: RAG+Qwen2.5-72b

### Exploring Community Perception Thresholds for Vacant Urban Land

The perception of vacant urban land (VUL) can significantly shift over time, especially as it remains unused. Understanding the thresholds at which residents start viewing VUL as "abandoned" rather than holding potential is crucial for urban planners, developers, and policymakers. This shift in perception can influence community attitudes, investment decisions, and ultimately, the future development of urban spaces. Additionally, exploring whether there are significant differences in tolerance towards VUL among communities with varying cultural backgrounds can provide valuable insights into context-specific nuances that need to be considered.

### Duration-Dependent Perception Shifts

**Idle Duration and Abandonment Perception**

Residents generally have a certain tolerance level for vacant land, which can gradually diminish as the land remains idle for extended periods. The exact duration can vary based on several factors, including the initial condition of the land, previous land use, and community expectations. However, studies suggest that a critical threshold often lies between 6 to 12 months. Within this timeframe, the initial optimism or indifference towards the land starts to wane, giving way to concerns about neglect, safety, and potential negative impacts on the neighborhood. For instance, if a former commercial space remains vacant for more than six months without any visible signs of redevelopment, residents may interpret this as the landowner's lack of interest, leading to perceptions of abandonment.

**Impact of Neglect Signs**

The perception of abandonment can be accelerated by the presence of neglect signs, such as overgrown vegetation, litter, and vandalism. These visual cues serve as markers of neglect, reinforcing the notion that the land is abandoned. Regular maintenance, even if minimal, can delay this perception shift, as it signals some level of care and potential for future development. Therefore, urban planners and landowners should consider implementing regular upkeep measures, even for idle properties, to maintain community confidence and prevent negative perceptions from taking root.

### Cultural Background and Tolerance Levels

**Cultural Variations in Perceptions**

Communities with different cultural backgrounds exhibit varying degrees of tolerance towards vacant land, influenced by cultural values, historical experiences, and societal norms. For example, in cultures with strong communal ties and a history of community-led initiatives, residents may be more patient and open to the idea of future development, even if the land remains idle for extended periods. Conversely, in cultures with a strong emphasis on individual property rights and economic efficiency, residents may be less tolerant of vacant land, expecting prompt action from landowners or the government.

**Context-Specific Factors**

Several context-specific factors can contribute to these cultural differences. Economic conditions, for instance, play a significant role. In economically vibrant areas, residents may have higher expectations for land use and less tolerance for vacant land, as they see it as a wasted opportunity. In contrast, in economically distressed areas, residents may be more accepting of vacant land, recognizing the challenges of redevelopment and valuing any potential for future economic opportunities.

Additionally, historical experiences with urban development and community engagement can shape cultural perceptions. Communities that have experienced successful community-led revitalization projects may exhibit greater patience and optimism, while those that have faced prolonged neglect and failed development attempts may be more skeptical and intolerant of vacant land.

### Conclusion

Understanding the perception thresholds for vacant urban land is essential for effective urban planning and community engagement. By recognizing the duration-dependent nature of these perceptions and acknowledging the cultural variations in tolerance levels, urban planners can develop strategies that address community concerns and harness the potential of VUL. Regular maintenance, clear communication about future plans, and context-specific engagement approaches can help maintain community confidence and prevent perceptions of abandonment from taking root. Ultimately, a nuanced understanding of these factors can lead to more inclusive and sustainable urban development practices.

### Model: RAG+Llama3.1-70b

Community perception thresholds regarding the idle duration of vacant land are crucial in understanding how residents perceive and interact with vacant land in their neighborhoods. Here's a detailed analysis of the topic:

**Community Perception Thresholds:**

1. **Idle Duration:** The length of time vacant land remains unused before residents begin to perceive it as "abandoned" rather than holding potential can vary significantly among communities. Research suggests that this threshold can range from a few months to several years, depending on factors such as the type of land, location, and community characteristics.
2. **Cultural Background:** Communities with different cultural backgrounds may have varying levels of tolerance toward vacant land. For example, some cultures may view vacant land as an opportunity for future development, while others may see it as a sign of neglect or abandonment.
3. **Socioeconomic Factors:** Socioeconomic factors, such as income level, education, and occupation, can also influence community perception thresholds. For instance, residents with higher incomes or education levels may be more likely to view vacant land as a potential opportunity for development, while those with lower incomes or education levels may be more likely to see it as a sign of neglect.

**Significant Differences in Tolerance:**

1. **Urban vs. Rural Communities:** Urban communities may have a lower tolerance for vacant land, as it can be seen as a sign of urban decay or neglect. In contrast, rural communities may be more accepting of vacant land, as it can be viewed as a natural part of the landscape.
2. **Ethnic and Racial Differences:** There may be significant differences in tolerance toward vacant land among communities with different ethnic and racial backgrounds. For example, some communities may view vacant land as a symbol of community pride or identity, while others may see it as a sign of neglect or disinvestment.
3. **Age and Generational Differences:** Age and generational differences can also influence community perception thresholds. For instance, younger residents may be more likely to view vacant land as a potential opportunity for development, while older residents may be more likely to see it as a sign of neglect or abandonment.

**Factors Influencing Community Perception:**

1. **Land Use Patterns:** Land use patterns, such as the presence of nearby parks or open spaces, can influence community perception of vacant land. For example, residents may be more likely to view vacant land as a potential park or recreational space if there are nearby parks or open spaces.
2. **Community Engagement:** Community engagement and participation in planning and decision-making processes can also influence community perception of vacant land. For instance, residents who are actively engaged in planning and decision-making processes may be more likely to view vacant land as a potential opportunity for development.
3. **Economic Factors:** Economic factors, such as property values and local economic conditions, can also influence community perception of vacant land. For example, residents may be more likely to view vacant land as a potential opportunity for development if property values are increasing or if there are signs of local economic growth.

**Conclusion:**

Community perception thresholds regarding the idle duration of vacant land are complex and influenced by a variety of factors, including cultural background, socioeconomic factors, and land use patterns. Understanding these factors is crucial in developing effective strategies for revitalizing vacant land and improving community perceptions of these areas. Further research is needed to explore the nuances of community perception thresholds and to develop targeted interventions that address the unique needs and concerns of different communities.

### Model: RAG+Deepseek-R1-70b

The perception of vacant land as "abandoned" rather than holding potential is influenced by a variety of factors, including location, maintenance, economic conditions, cultural background, and historical context.

1. **Location and Context:** In urban areas, vacant land is likely to be perceived as abandoned more quickly than in rural areas, where empty spaces are more common. The condition of the land, such as the presence of weeds or trash, can also influence perceptions.

2. **Maintenance:** Well-maintained vacant land, even if unused, may retain its potential in the eyes of the community, whereas neglected land may be seen as abandoned.

3. **Economic Factors:** In economically challenged areas, vacant land might be viewed as a sign of decline, leading to quicker perceptions of abandonment. Conversely, in prosperous areas, vacant land might be seen as an opportunity for future development.

4. **Cultural Differences:** Cultural backgrounds can significantly affect tolerance levels. Some cultures may view unused land negatively, while others might see it as a shared resource or an opportunity for community projects.

5. **Historical Context:** Areas with a history of neglect or decline may lead to quicker perceptions of abandonment, while communities with strong social cohesion may work together to maintain or repurpose vacant land.

In conclusion, while the exact duration for perceiving land as abandoned is not universal, understanding the interplay of these factors provides insights into community perceptions. Further research, including surveys and regional comparisons, would be beneficial to quantify these dynamics and explore cultural differences in tolerance toward vacant land.

### Model: RAG+Gemma3-27b

The perception of when vacant land transitions from holding “potential” to being perceived as “abandoned” is highly variable and influenced by a complex interplay of factors. There isn’t a universal threshold, but rather a spectrum shaped by contextual elements and cultural backgrounds.

**1. Factors Influencing Perception Thresholds:**

* **Duration of Vacancy:** While not the sole determinant, the length of time a lot remains unused is a primary factor. Generally, beyond 6-12 months, negative perceptions begin to increase significantly.
* **Physical Condition:** Visible signs of neglect (litter, overgrown vegetation, structural decay) dramatically lower the tolerance threshold. A well-maintained vacant lot is perceived more favorably.
* **Neighborhood Context:** Vacant land in economically distressed neighborhoods is more likely to be seen as abandoned than in thriving areas.
* **Community Engagement:** Active community involvement in planning for the future use of the land can significantly extend the tolerance threshold.
* **Evidence of Future Plans:** Visible signs of planning (e.g., surveys, permits, community meetings) suggest the land hasn’t been forgotten and can increase tolerance.
* **Local Land Use History:** Communities with a history of agriculture or natural landscapes may have a higher tolerance for fallow land.

**2. Cultural Differences in Tolerance:**

* **Land Ownership Values:** Cultures with strong traditions of private land ownership and active land use often have lower tolerance for prolonged vacancy.
* **Communal Land Use Practices:** Cultures with a more communal view of land may be more accepting of vacant spaces as shared resources or potential community gardens.
* **Historical Context:** Past experiences with land abandonment or disinvestment can shape current perceptions.
* **Immigrant Communities:** Newly arrived immigrant communities may have different perspectives on vacant land based on their experiences in their countries of origin.
* **Indigenous Perspectives:** Indigenous communities often have unique relationships with land and may view vacancy differently, potentially prioritizing ecological restoration or traditional uses.

**3. Socioeconomic Variations:**

* **Income Level:** Lower-income communities often perceive vacant land as a sign of decline and disinvestment, leading to lower tolerance.
* **Education Level:** Higher education levels may correlate with a greater understanding of potential redevelopment opportunities and a higher tolerance for vacancy.
* **Homeownership Rates:** Higher homeownership rates may lead to greater community investment and a stronger desire for vacant land to be utilized.

**4. Research Methods for Assessing Perception:**

* **Qualitative Research:** In-depth interviews and focus groups with residents to understand their perceptions, attitudes, and experiences.
* **Quantitative Surveys:** Surveys to collect data on residents’ perceptions of vacant land, their tolerance levels, and demographic characteristics.
* **Spatial Analysis:** Mapping resident perceptions of vacant land to identify spatial patterns and correlations with socioeconomic factors.
* **Participatory Mapping:** Engaging residents in mapping their perceptions of vacant land and identifying potential uses.

**5. Conclusion:**

Understanding community perception thresholds is crucial for effective urban planning. A nuanced approach that considers local context, cultural background, and socioeconomic factors is essential. Engaging residents in the planning process and addressing their concerns can help to transform vacant land from a source of blight into a valuable community asset.

### Model: RAG+GPT-4o

The perception of vacant land as "abandoned" rather than "holding potential" is influenced by various factors, including the duration of vacancy, cultural contexts, and neighborhood characteristics. Here's an in-depth analysis:

**1. Duration of Vacancy:**
 - **Initial Perception:** In many communities, vacant land may be perceived as holding potential if it remains unused for a short period, typically a few months.
 - **Transition to Abandonment:** The threshold at which land is perceived as abandoned often occurs after it remains unused and unmaintained for an extended period, commonly 6 months to 2 years, depending on local context and visibility of neglect.
 - **Visible Signs of Neglect:** Physical deterioration, such as overgrown vegetation, trash accumulation, or vandalism, can accelerate the perception of abandonment.

**2. Cultural Differences in Tolerance:**
 - **Land Ownership Values:** Cultures with strong values around land ownership and active use may perceive vacant land as abandoned more quickly.
 - **Community Cohesion:** In communities with strong social ties and collective land use practices, there may be greater tolerance for vacant land if it serves a communal purpose or is seen as a potential future resource.
 - **Historical Context:** Historical experiences with land use, such as past disinvestment or redevelopment efforts, can shape current perceptions of vacant land.
 - **Immigrant and Indigenous Communities:** Diverse cultural backgrounds can influence perceptions, with some immigrant communities viewing vacant land as an opportunity for community-led projects, while Indigenous communities may view land through a lens of traditional ecological knowledge.

**3. Socioeconomic and Neighborhood Factors:**
 - **Economic Conditions:** In economically distressed areas, vacant land may quickly be seen as a sign of decline, whereas in thriving areas, it may be viewed as an opportunity for investment and development.
 - **Neighborhood Stability:** In stable neighborhoods with active community engagement, residents may be more optimistic about the potential uses of vacant land.
 - **Property Values:** Higher property values may correlate with a greater expectation for land use, leading to quicker perceptions of abandonment if land remains idle.

**4. Research Methods for Assessing Perceptions:**
 - **Qualitative Studies:** Conduct interviews and focus groups with residents to understand their perceptions of vacant land and factors influencing these views.
 - **Surveys:** Use surveys to quantify tolerance levels and identify demographic or cultural patterns in perceptions of vacancy.
 - **Spatial Analysis:** Utilize mapping tools to explore geographic patterns in perceptions of vacant land across different communities.

**5. Implications for Urban Planning:**
 - **Community Engagement:** Involve residents in planning processes to understand their perceptions and incorporate their input into land use decisions.
 - **Temporary Uses:** Explore temporary uses for vacant land, such as community gardens or pop-up parks, to maintain engagement and demonstrate potential value.
 - **Cultural Sensitivity:** Recognize and respect cultural differences in perceptions of vacant land when developing policies and interventions.

Understanding the nuanced factors that influence community perceptions of vacant land can guide urban planners and policymakers in making informed decisions that align with community values and address concerns about abandonment.

## TOPIC3: Predicting Future Demand and Uses of Urban Vacant Land Using Big Data and AI.

## -How can big data and artificial intelligence techniques be used to forecast the future demand and potential uses of urban vacant land?

## -This question calls for exploring data-driven methods that leverage historical urban data and current socioeconomic dynamics to predict usage trends, particularly amid urbanization.

### Model: Qwen2.5-7b

Predicting the future demand and potential uses of urban vacant land using big data and artificial intelligence (AI) involves a multi-step process that integrates various data sources, employs advanced analytics techniques, and utilizes machine learning models. Here’s how this can be achieved:

### 1. Data Collection and Integration

Sources of Data:
- Historical Land Use Data: Information on past land use patterns.
- Urban Planning Documents: Zoning laws, development plans, and infrastructure projects.
- Socioeconomic Data: Population demographics, income levels, employment rates, and migration trends.
- Real-Time Data: Weather data, traffic flow, public transportation usage, and real estate transactions.
- Satellite Imagery and Remote Sensing: For monitoring land changes over time.

Data Integration:
- Use data warehousing or cloud-based platforms to store and manage large volumes of diverse datasets.
- Implement ETL (Extract, Transform, Load) processes to clean and integrate data from different sources.

### 2. Data Preprocessing

- Cleaning and Normalization: Remove inconsistencies, fill missing values, and standardize formats.
- Feature Engineering: Create new features that might be relevant for prediction models, such as distance to public transport hubs or proximity to commercial centers.
- Temporal Aggregation: Aggregate data over time periods (e.g., monthly, yearly) if necessary.

### 3. Exploratory Data Analysis

- Visualization Tools: Use tools like Tableau, Power BI, or Python libraries (Matplotlib, Seaborn) for visualizing trends and patterns in the data.
- Statistical Analysis: Perform correlation analysis to identify relationships between different variables.

### 4. Model Selection and Training

Model Types:
- Regression Models: Linear regression, decision trees, random forests, gradient boosting machines (GBM).
- Time Series Forecasting Models: ARIMA, SARIMA, LSTM neural networks.
- Clustering Algorithms: K-means, hierarchical clustering to group similar land use patterns.

Training Process:
- Split the data into training and testing sets.
- Train multiple models using cross-validation techniques to avoid overfitting.
- Evaluate model performance using metrics like RMSE (Root Mean Squared Error), MAE (Mean Absolute Error), or accuracy for classification tasks.

### 5. Feature Importance Analysis

- Use feature importance scores from tree-based models (like Random Forest) to understand which factors are most influential in predicting land use trends.

### 6. Scenario Modeling and Simulation

- Scenario Planning: Develop different scenarios based on varying assumptions about future urban growth, economic conditions, or policy changes.
- Simulation Models: Use agent-based modeling or system dynamics models to simulate the impact of these scenarios on vacant land usage.

### 7. Decision Support Systems

- Integrate AI-driven predictions into decision support systems that city planners and policymakers can use to make informed decisions about urban development.
- Provide interactive dashboards for stakeholders to visualize predicted trends and explore "what-if" scenarios.

### 8. Continuous Monitoring and Updating

- Regularly update the model with new data as it becomes available.
- Re-train models periodically to adapt to changing conditions in the city.

### Example Workflow:

1. Data Collection: Gather historical land use data, socioeconomic indicators, and real-time urban dynamics.
2. Preprocessing: Clean and integrate datasets, create relevant features.
3. Exploratory Analysis: Visualize trends and patterns using tools like Tableau or Python libraries.
4. Model Training: Train regression models to predict future demand for different land uses.
5. Scenario Modeling: Develop scenarios based on varying assumptions about urban growth.
6. Decision Support: Integrate predictions into a decision support system for city planners.
7. Continuous Monitoring: Regularly update the model with new data and retrain as necessary.

By leveraging big data and AI, cities can better anticipate future land use needs, optimize resource allocation, and plan sustainable development strategies that align with urbanization trends.

### Model: Llama3.1-8b

Predicting the future demand and potential uses of urban vacant land is a complex task that requires integrating various data sources and leveraging advanced analytics techniques. Here's a comprehensive approach using big data and AI:

Data Collection

1. Historical Land Use Data: Gather historical data on land use patterns, including zoning regulations, property ownership, and previous development projects.
2. Urban Planning Documents: Collect urban planning documents, such as master plans, zoning ordinances, and transportation studies.
3. Socioeconomic Data: Obtain socioeconomic data, including population growth rates, income levels, education attainment, and employment statistics.
4. Geospatial Data: Utilize geospatial data, including satellite imagery, LiDAR (Light Detection and Ranging) scans, and GIS (Geographic Information System) maps to analyze land use patterns and urban morphology.
5. Social Media and Online Platforms: Monitor social media platforms, online forums, and review websites to gather information on community preferences, concerns, and opinions regarding vacant land.

Data Preprocessing

1. Data Integration: Integrate the collected data into a unified framework using data warehousing or data lakes.
2. Data Cleaning: Clean and preprocess the data by handling missing values, outliers, and inconsistencies.
3. Data Transformation: Transform the data into a suitable format for analysis, such as converting categorical variables to numerical variables.

Predictive Modeling

1. Machine Learning Algorithms: Apply machine learning algorithms, including:
 - Regression models (e.g., linear regression, decision trees) to predict future land use values.
 - Classification models (e.g., logistic regression, random forests) to identify potential uses of vacant land.
 - Clustering models (e.g., k-means, hierarchical clustering) to group similar urban areas and identify trends.
2. Deep Learning Techniques: Utilize deep learning techniques, such as:
 - Convolutional Neural Networks (CNNs) for image classification and object detection in geospatial data.
 - Recurrent Neural Networks (RNNs) for time-series analysis of socioeconomic data.

AI-powered Analysis

1. Natural Language Processing (NLP): Apply NLP techniques to analyze text data from social media, online forums, and review websites to identify community preferences and concerns.
2. Sentiment Analysis: Perform sentiment analysis on text data to gauge public opinion regarding vacant land development.
3. Geospatial Analysis: Utilize geospatial analysis tools to visualize and analyze the spatial relationships between urban features, such as transportation infrastructure, parks, and commercial areas.

Visualization and Communication

1. Interactive Maps: Create interactive maps using web-based mapping platforms (e.g., ArcGIS Online, Google Maps) to visualize predicted land use patterns and potential uses of vacant land.
2. Data Visualization Tools: Utilize data visualization tools (e.g., Tableau, Power BI) to create dashboards and reports that communicate the results of predictive modeling and AI-powered analysis.

Case Studies

1. Singapore's Urban Planning Framework: Analyze Singapore's urban planning framework, which incorporates big data and AI techniques to predict future land use patterns and optimize development projects.
2. Barcelona's Smart City Initiatives: Examine Barcelona's smart city initiatives, which leverage big data and AI to improve urban planning, transportation systems, and public services.

Challenges and Limitations

1. Data Quality and Availability: Ensure the quality and availability of historical and current data on land use patterns, socioeconomic dynamics, and geospatial features.
2. Scalability and Complexity: Address scalability and complexity issues when integrating large datasets and applying advanced analytics techniques.
3. Interpretation and Validation: Validate the results of predictive modeling and AI-powered analysis by interpreting the findings in the context of urban planning and development.

By following this comprehensive approach, cities can harness the power of big data and AI to predict future demand and potential uses of urban vacant land, ultimately informing more informed decision-making and sustainable urban development.

### Model: Deepseek-R1-7b

To address the challenge of predicting future demand and potential uses for urban vacant land using big data and AI, we can follow a structured approach that integrates historical data, socioeconomic factors, and advanced machine learning techniques. Here's a comprehensive plan:

### Data Collection and Integration
1. Historical Data: Gather historical records on vacant land, including location, size, condition, previous uses, and nearby developments from city planning databases, government sources, and satellite imagery.
2. Socioeconomic Factors: Incorporate data from census sources, housing market reports, population growth trends, and migration patterns to understand demand drivers.
3. Demographic Information: Include data on age groups, income levels, and ethnic composition to identify potential market segments.

### AI Techniques Application
1. Predictive Analytics: Use regression models for continuous outcomes (e.g., predicting future vacancy rates) or classification models to categorize land use into predefined categories.
2. Clustering Algorithms: Apply K-means or hierarchical clustering to group similar vacant lands, revealing hidden patterns in land use trends.
3. Natural Language Processing (NLP): Utilize sentiment analysis on textual data from news articles and community surveys to gauge public opinion on land use preferences.
4. Deep Learning Models: Employ CNNs to analyze satellite imagery for visual assessment of land condition and potential uses.

### Model Development and Validation
1. Dataset Construction: Create a comprehensive dataset integrating all collected variables, ensuring data quality and consistency.
2. Model Training: Train AI models on this dataset to predict future land use trends, considering both quantitative (big data) and qualitative (NLP) inputs.
3. Regular Updates: Continuously update the model with new data to adapt to changing urban dynamics.

### Ethical and Practical Considerations
1. Data Privacy: Ensure compliance with privacy laws when using personal data from social media.
2. Bias Mitigation: Implement fairness checks in AI models to avoid biased predictions, especially in underserved areas.
3. Stakeholder Collaboration: Engage government agencies, private developers, NGOs, and community groups for accurate predictions and effective planning.

### Implementation and Application
1. Decision Support Tools: Develop tools that provide actionable insights for city planners, enabling informed decisions on land reclamation and development prioritization.
2. Public Engagement: Use visualizations like heat maps to communicate findings clearly to decision-makers without technical expertise.

By integrating these elements, we can leverage big data and AI to predict urban vacant land trends effectively, promoting sustainable urban planning and addressing the challenges of modern city growth.

### Model: Gemma3-4b

Okay, let’s dive into Topic 3: Predicting Future Demand and Uses of Urban Vacant Land Using Big Data and AI. This is a really exciting and increasingly relevant area of urban research.

**1. The Core Approach – Data-Driven Forecasting:**

The fundamental idea is to move beyond traditional, often reactive, methods of assessing vacant land. Instead, we’re leveraging the massive amounts of data now available to create predictive models. This involves:

* **Data Collection – The “Big” Part:**
 * **Geographic Information Systems (GIS):** Core to this. Layering data on vacant land with information about:
 * **Demographic Data:** Population density, age distribution, income levels, household size – all indicators of future demand.
 * **Economic Data:** Employment rates, industry clusters, commercial activity, retail sales.
 * **Transportation Networks:** Proximity to public transit, road networks – influencing development potential.
 * **Zoning Regulations:** Current zoning designations, development restrictions.
 * **Property Records:** Historical sales data, property values, ownership information.
 * **Social Media Data:** (More advanced) Sentiment analysis – gauging public opinion about potential development areas.
 * **IoT Data:** (Emerging) Sensors measuring environmental conditions (temperature, humidity, air quality) – potentially influencing the type of development.

* **AI & Machine Learning Techniques – The “Intelligent” Part:**
 * **Regression Models:** Predicting land use based on correlations between variables (e.g., predicting residential demand based on population density and proximity to schools).
 * **Time Series Analysis:** Forecasting future demand based on historical trends.
 * **Neural Networks (especially Recurrent Neural Networks – RNNs):** Excellent for capturing complex, non-linear relationships and predicting future demand based on sequential data (e.g., considering how past development patterns influence future trends).
 * **Clustering Algorithms:** Identifying groups of vacant land with similar characteristics – allowing for targeted interventions.
 * **Agent-Based Modeling:** Simulating the interactions of different actors (developers, residents, government agencies) to predict how vacant land might be used over time.

**2. Specific Use Cases & Potential Predictions:**

* **Residential Demand:** Predicting the likelihood of new housing development based on demographic shifts and affordability factors.
* **Commercial Development:** Identifying areas with high potential for retail or office space based on consumer behavior and economic trends.
* **Green Space & Recreation:** Predicting the demand for parks and open spaces based on population density and access to existing amenities.
* **Mixed-Use Development:** Identifying areas where a combination of residential, commercial, and recreational uses would be most successful.

**3. Addressing Challenges & Considerations:**

* **Data Quality & Completeness:** The accuracy of the predictions depends entirely on the quality of the data. Addressing data gaps and inconsistencies is crucial.
* **Bias in Data:** Recognizing and mitigating potential biases in the data – for example, historical zoning patterns that may have perpetuated segregation.
* **Dynamic Urban Environments:** Urban areas are constantly changing. The models need to be regularly updated and recalibrated to account for new developments and shifting trends.
* **Interpretability:** "Black box" AI models can be difficult to understand. It’s important to develop models that are transparent and explainable.

**4. Connecting to Existing Research (Context 1 & 3):**

* **Context 1**’s use of the Land Transformation Model (LTM) as an artificial neural network provides a foundation. Big data and AI can build upon this, offering a more sophisticated and dynamic approach.
* **Context 3**’s emphasis on community engagement and hybrid planning tools is vital. AI-driven predictions shouldn't be used in isolation; they need to be informed by local knowledge and values.

**5. Further Research Questions:**

* What are the most effective AI algorithms for predicting urban land use?
* How can we ensure that AI-driven predictions are equitable and don't exacerbate existing inequalities?
* How can we integrate citizen science data into the forecasting process?

To help me tailor this discussion further, could you tell me:

* Are you particularly interested in a specific type of urban area (e.g., a dense city, a suburban area, a brownfield site)?
* Are there any particular AI techniques you’d like to explore in more detail (e.g., RNNs, agent-based modeling)?

### Model: GPT-4o-mini

Predicting future demand and potential uses of urban vacant land using big data and artificial intelligence (AI) represents a significant opportunity to inform city planning, policy-making, and economic development. By leveraging a mix of historical urban data, real-time information, and socioeconomic dynamics, urban planners and stakeholders can make informed decisions. Here’s a comprehensive approach utilizing big data and AI for this purpose:

### 1. Data Collection and Integration
To forecast demand and potential uses of urban vacant land, a variety of data sources must be gathered and integrated:
- Geospatial Data: Geographic Information Systems (GIS) can be used to analyze the spatial characteristics of vacant land, including proximity to transportation, amenities, and existing infrastructure.
- Demographic Data: Population density, income levels, age distribution, and migration patterns help identify potential users of the land.
- Economic Indicators: Data on local job markets, business activities, and real estate trends can inform about potential demand for different land uses.
- Historical Usage Patterns: Analyzing past trends regarding how vacant land has been utilized (or remains vacant) can provide insight into future patterns.
- Social Media and Sentiment Analysis: Big data from social media platforms can indicate community interests and sentiments regarding urban development and the types of spaces that are desired.

### 2. Machine Learning Models
The processed data can be used to develop machine learning models to predict future demand and uses of vacant land:
- Regression Analysis: Models can predict future demand based on historical trends and contributing factors, such as demographic changes and economic growth.
- Classification Algorithms: ML models can categorize vacant land into potential uses (e.g., residential, commercial, recreational) based on features like location and historical usage.
- Clustering Techniques: Algorithms like k-means can identify clusters of similar properties, helping to identify neighborhoods with similar trends and potential land-use patterns.
- Time Series Forecasting: Methods such as ARIMA or LSTM networks can predict how demand might evolve over time, analyzing trends and seasonal patterns in land use.

### 3. Scenario Analysis and Simulation
Using AI-driven simulation techniques can provide insights into various scenarios that may influence land usage:
- What-if Analyses: Simulations can explore impacts of zoning changes, policy interventions, or market shocks on land demand.
- Agent-based Modeling: Simulating interactions among individuals, companies, and governmental bodies can provide a dynamic view of land-use evolution based on different stakeholder behaviors.

### 4. Visualization Tools
Data visualization tools and dashboards can be crafted to present findings to decision-makers:
- Interactive Maps: Layers showing predicted land use types overlaid on current conditions can help visualize potential changes.
- Trend Analysis Dashboards: Tools that showcase economic trends, demographic shifts, and identified demand patterns can facilitate data-driven decision-making for urban planners.

### 5. Community Engagement
Using AI techniques can also enable participatory planning:
- Surveys and Feedback Analysis: NLP can be used to analyze community feedback from surveys, forums, and public meetings to gauge public sentiment on potential uses of vacant land.
- Crowdsourced Data: Platforms that solicit ideas from residents and stakeholders can enrich datasets and provide insight into community needs and desires.

### 6. Continuous Learning
As urban dynamics change, AI systems can be designed to learn continuously and adjust forecasts accordingly:
- Adaptive Algorithms: Implementing machine learning frameworks that adapt to new data or feedback allows models to remain relevant over time.
- Real-time Monitoring: Integrating IoT sensors or other real-time monitoring tools can provide ongoing data feeds to update models in real time, allowing for the agile modification of predictions.

### Conclusion
The integration of big data and AI into the forecasting of urban vacant land usage provides a proactive method for urban planning. By fostering data-driven decision-making, cities can optimize land use to meet future needs, support sustainable growth, and enhance urban livability in an era of increasing urbanization. The collaboration among multiple stakeholders—including local governments, urban planners, community organizations, and technology experts—will be essential for maximizing the potential of these sophisticated technologies.

### Model: Qwen-2.5-72b

### Predicting Future Demand and Uses of Urban Vacant Land Using Big Data and AI

#### Introduction
Urban vacant land represents a significant untapped resource in many cities, offering potential for economic growth, social development, and environmental sustainability. Predicting the future demand and potential uses of this land is crucial for effective urban planning and resource allocation. Big data and artificial intelligence (AI) can play a pivotal role in this process by leveraging historical urban data and current socioeconomic dynamics to forecast usage trends. This exploration will delve into the methods and techniques that can be employed to achieve this goal.

#### Data Collection and Integration
1. **Historical Urban Data:**
 - **Land Use Records:** Historical data on land use, zoning, and development patterns.
 - **Property Values:** Historical property values and real estate transactions.
 - **Population Data:** Demographic information, including population growth and migration patterns.
 - **Economic Indicators:** Employment rates, income levels, and business activity.

2. **Current Data:**
 - **Socioeconomic Data:** Current economic conditions, employment rates, and income levels.
 - **Environmental Data:** Climate data, pollution levels, and green space availability.
 - **Infrastructure Data:** Transportation networks, utilities, and public services.
 - **Social Media and Crowdsourced Data:** Public opinions, community feedback, and social trends.

3. **Real-Time Data:**
 - **IoT Sensors:** Data from sensors monitoring traffic, air quality, and other environmental factors.
 - **Geospatial Data:** Real-time location data from mobile devices and GPS systems.

#### Data Preprocessing
1. **Data Cleaning:**
 - Remove inconsistencies, missing values, and outliers.
 - Standardize data formats and units.

2. **Data Integration:**
 - Combine data from various sources into a unified dataset.
 - Ensure data compatibility and consistency.

3. **Feature Engineering:**
 - Create new features that capture relevant information, such as population density, proximity to public transportation, and environmental quality.

#### Analytical Methods
1. **Descriptive Analytics:**
 - Summarize and visualize historical and current data to identify trends and patterns.
 - Use statistical methods to understand the distribution and relationships between variables.

2. **Predictive Analytics:**
 - **Time Series Analysis:** Model and forecast future trends using historical data.
 - **Machine Learning Models:**
 - **Regression Models:** Predict future land values and demand based on historical data.
 - **Classification Models:** Classify land use types based on various features.
 - **Clustering Models:** Identify similar areas for targeted development.
 - **Deep Learning Models:** Use neural networks to capture complex patterns and relationships in large datasets.

3. **Prescriptive Analytics:**
 - Use optimization algorithms to determine the best land use scenarios.
 - Simulate different development scenarios to evaluate their impact on the community and environment.

#### Implementation and Application
1. **Urban Planning:**
 - **Zoning Decisions:** Use predictive models to inform zoning decisions and land use policies.
 - **Infrastructure Development:** Prioritize infrastructure projects based on predicted demand and usage.

2. **Economic Development:**
 - **Investment Opportunities:** Identify areas with high potential for economic growth and investment.
 - **Business Location Analysis:** Help businesses choose optimal locations based on predicted demand and customer behavior.

3. **Sustainability:**
 - **Green Space Planning:** Allocate land for green spaces to improve environmental quality and public health.
 - **Smart City Initiatives:** Use data-driven insights to support the development of smart city infrastructure and services.

#### Challenges and Considerations
1. **Data Privacy and Security:**
 - Ensure that data collection and analysis comply with privacy regulations.
 - Protect sensitive information and prevent data breaches.

2. **Data Quality and Bias:**
 - Address potential biases in the data to ensure accurate and fair predictions.
 - Continuously monitor and improve data quality.

3. **Community Engagement:**
 - Involve the community in the decision-making process to ensure that predictions and plans align with local needs and preferences.
 - Use transparent and explainable AI models to build trust and understanding.

4. **Scalability and Flexibility:**
 - Develop scalable solutions that can be applied to different cities and regions.
 - Ensure that the models can adapt to changing conditions and new data.

#### Conclusion
Big data and AI offer powerful tools for predicting future demand and potential uses of urban vacant land. By leveraging a wide range of data sources and advanced analytical methods, urban planners and policymakers can make informed decisions that promote economic growth, social development, and environmental sustainability. Addressing the challenges and considerations associated with data-driven urban planning will be essential for realizing the full potential of these technologies.

### Model: Llama-3.1-70b

Predicting future demand and uses of urban vacant land is crucial for urban planning and development. Big data and artificial intelligence (AI) techniques can play a significant role in forecasting the future demand and potential uses of urban vacant land. Here are some ways to leverage these technologies:

1. **Data Collection**: Gather historical urban data, including land use patterns, demographic information, economic indicators, and spatial data (e.g., satellite imagery, GIS). This data can be sourced from government agencies, surveys, sensors, and online platforms.
2. **Data Integration**: Combine and integrate the collected data to create a comprehensive dataset. This can involve data cleaning, transformation, and formatting.
3. **Machine Learning (ML) Algorithms**: Apply ML algorithms to analyze the integrated data and identify patterns, trends, and correlations. Some suitable algorithms include:
 * Regression analysis to predict land use demand based on socioeconomic factors.
 * Clustering algorithms to group similar vacant land parcels based on their attributes.
 * Decision trees to identify key factors influencing land use decisions.
4. **Predictive Modeling**: Develop predictive models to forecast future land use trends. These models can incorporate:
 * Statistical models (e.g., regression, time series analysis) to predict land use demand.
 * Spatial models (e.g., spatial regression, cellular automata) to simulate land use dynamics.
 * Scenario planning to evaluate the impact of different urban development strategies.
5. **Natural Language Processing (NLP)**: Use NLP techniques to analyze text data (e.g., urban planning documents, social media feeds) to gain insights into public opinions, policy changes, and emerging trends.
6. **Sentiment Analysis**: Apply sentiment analysis to gauge the public's perception of different land uses and urban development projects.
7. **Geospatial Analysis**: Leverage geospatial analysis to assess the spatial relationships between vacant land, urban infrastructure, and socioeconomic factors.
8. **Real-time Data**: Integrate real-time data from sensors and online platforms to monitor urban dynamics and adjust land use predictions accordingly.
9. **Visualization**: Utilize data visualization tools to communicate the results of the analysis and predictive models to stakeholders, including policymakers, developers, and the public.
10. **Continuous Evaluation**: Regularly update and refine the predictive models based on new data, changing urban dynamics, and lessons learned from implementation.

**Example Use Cases:**

1. **Identifying Potential Affordable Housing Sites**: Use ML algorithms to identify vacant land parcels suitable for affordable housing developments, considering factors like proximity to public transportation, schools, and employment opportunities.
2. **Predicting Urban Sprawl**: Develop predictive models to forecast urban sprawl patterns, taking into account factors like population growth, income levels, and transportation infrastructure.
3. **Evaluating Green Infrastructure**: Use data analytics and geospatial analysis to evaluate the potential for green infrastructure (e.g., parks, green roofs) in urban vacant land, considering factors like climate, urban heat island effects, and stormwater management.

**Challenges and Limitations:**

1. **Data Quality and Availability**: Ensuring access to high-quality, relevant, and up-to-date data is crucial.
2. **Complexity of Urban Systems**: Urban systems are complex, dynamic, and influenced by numerous factors, making it challenging to develop accurate predictive models.
3. **Interpretability and Explainability**: Ensuring that predictive models are interpretable and explainable is essential for building trust with stakeholders.
4. **Incorporating Uncertainty**: Accounting for uncertainty in predictive models is crucial, as urban development is inherently uncertain.

By leveraging big data and AI techniques, urban planners and policymakers can make more informed decisions about the future demand and uses of urban vacant land, ultimately contributing to more sustainable, equitable, and resilient urban development.

### Model: Deepseek-R1-70b

To predict the future demand and potential uses of urban vacant land using big data and AI, a comprehensive approach that integrates data collection, advanced analytics, and stakeholder engagement is essential. Here's a structured strategy:

### Data Collection and Integration
1. **Historical Data**: Compile data on past land uses, including residential, commercial, and industrial uses.
2. **Socio-Economic Data**: Gather information on population growth, income levels, and nearby businesses.
3. **Market Trends**: Analyze demand for housing, office spaces, and retail.
4. **Zoning Regulations**: Incorporate land-use policies and regulations.
5. **Environmental Factors**: Consider soil quality, flood zones, and other environmental aspects.
6. **Location-Based Data**: Assess proximity to schools, parks, and transportation.
7. **Urban Development Plans**: Review city plans for future development areas.
8. **Economic Indicators**: Include property prices, rental yields, and investment trends.
9. **Technological Trends**: Monitor trends like remote work that could influence land use.

### Analytical Techniques
1. **Machine Learning Models**: Use historical and socio-economic data to predict future trends.
2. **Natural Language Processing (NLP)**: Analyze planning documents and policies.
3. **Computer Vision**: Utilize satellite imagery to assess land use changes.
4. **Predictive Modeling**: Forecast demand based on population growth and infrastructure.
5. **Scenario Analysis**: Explore different future scenarios with AI.
6. **Clustering Analysis**: Identify areas with similar characteristics for targeted development.
7. **Geospatial Analysis**: Map potential land uses based on location and other variables.

### Stakeholder Engagement
1. **Collaboration with Experts**: Involve urban planners, policymakers, and private developers to refine predictions.
2. **Interactive Dashboards**: Develop tools for exploring and visualizing predictions.

### Challenges and Solutions
1. **Data Quality**: Ensure data is accurate and updated; combine public and private sources.
2. **Privacy**: Use anonymization and aggregation to protect sensitive information.
3. **Bias Mitigation**: Audit models for fairness and involve diverse stakeholders.
4. **Infrastructure and Skills**: Invest in technology and train staff for effective use.

### Conclusion
By leveraging big data and AI, cities can predict land use trends, leading to efficient planning and sustainable development. This approach combines data-driven insights with local expertise to create resilient and adaptive urban strategies.

### Model: Gemma-3-27b

Okay, I can definitely help brainstorm how Big Data and AI can be used to predict future demand and potential uses of urban vacant land! This is a really interesting and increasingly important topic. Here's a breakdown of how we can approach this, categorized by data sources, AI techniques, and potential applications, aiming to be as helpful and thorough as possible.

**I. Data Sources - What Fueling the Predictions?**

We need a LOT of data! Here's a breakdown of the types of data that would be incredibly valuable:

* **Geospatial Data:** This is foundational.
 * **Parcel Data:** Ownership, size, zoning, assessed value, current land use (even if "vacant").
 * **Satellite & Aerial Imagery:** Changes over time, building footprints, vegetation, proximity to amenities. High-resolution imagery is key.
 * **Street View Data:** Provides "ground truth" about neighborhood conditions, accessibility.
 * **GIS Data:** Layers for transportation networks, utilities, parks, schools, etc.
 * **LiDAR Data:** Detailed 3D mapping - crucial for assessing buildability and potential.
* **Economic Data:**
 * **Real Estate Transactions:** Sales prices, rental rates, property taxes – historical and current.
 * **Employment Statistics:** Job growth/loss by sector, commuting patterns. (Bureau of Labor Statistics, local employment agencies)
 * **Business Licenses:** New business registrations indicate demand for commercial space.
 * **Consumer Spending Data:** Aggregate data (anonymized, of course!) indicating spending patterns in different areas.
 * **Construction Permits:** What *is* being built currently? This hints at future demand.
* **Demographic Data:**
 * **Census Data:** Population growth, age distribution, household income, education levels.
 * **Migration Patterns:** Where are people moving from and to? (USPS change-of-address data can be helpful, though imperfect).
 * **Social Media Data:** (Used cautiously and ethically - see section IV) Can reveal sentiment about neighborhoods, popular amenities.
* **Urban Planning Data:**
 * **Comprehensive Plans:** City's long-term vision for land use.
 * **Zoning Regulations:** Current zoning and potential for rezoning.
 * **Transportation Plans:** Proposed infrastructure projects (roads, public transit).
 * **Development Applications:** What projects are *proposed* but not yet approved?
* **Environmental Data:**
 * **Flood Maps:** Areas prone to flooding.
 * **Brownfield Data:** Information on contaminated sites requiring remediation.
 * **Environmental Impact Assessments:** Details of past environmental studies.


**II. AI Techniques - How to Analyze the Data?**

This is where the "magic" happens. Here are relevant AI techniques:

* **Regression Models (Linear, Multiple, Polynomial):** Predicting property values, rental rates, or demand based on multiple factors (size, location, demographics). These are good for baseline predictions.
* **Time Series Analysis (ARIMA, Prophet):** Analyzing historical trends in land use, vacancy rates, and real estate prices to forecast future trends. Especially useful when you have a long history of data.
* **Machine Learning (ML) Algorithms:**
 * **Random Forests & Decision Trees:** Can identify the most important factors influencing land use decisions. Good for understanding *why* a prediction is being made.
 * **Support Vector Machines (SVMs):** Effective for classification (e.g., classifying vacant land as suitable for residential, commercial, or industrial use).
 * **Gradient Boosting (XGBoost, LightGBM):** Often achieves higher accuracy than other ML algorithms for complex datasets.
* **Deep Learning (Neural Networks):** Particularly useful for processing image data (satellite imagery, street view) to identify patterns and features that might not be apparent to the human eye.
 * **Convolutional Neural Networks (CNNs):** For image recognition - identifying features like building density, green space, and road networks.
 * **Recurrent Neural Networks (RNNs):** For time series data and sequential data (e.g., tracking changes in land use over time).
* **Spatial Analysis & Geographically Weighted Regression (GWR):** Accounts for spatial autocorrelation – the fact that things that are close together are often more similar. This is crucial for urban analysis.
* **Clustering Algorithms (K-Means, DBSCAN):** Identifying groups of vacant land parcels with similar characteristics, potentially indicating similar future uses.
* **Natural Language Processing (NLP):** Analyzing text data from planning documents, news articles, and social media to extract insights about community preferences and development trends.


**III. Potential Applications & Predictions - What can we *do* with this?**

* **Demand Forecasting:**
 * **Predicting optimal location for different land uses:** Where is the demand for affordable housing highest? Where is there a need for more retail space?
 * **Estimating the optimal density of development:** How many units can be built on a vacant parcel without overwhelming infrastructure?
 * **Identifying areas ripe for redevelopment:** Predicting which vacant parcels are most likely to be redeveloped in the near future.
* **Land Use Suitability Analysis:**
 * **Automated zoning recommendations:** Based on data, suggest optimal zoning changes to encourage desired development.
 * **Identifying parcels suitable for specific uses:** (e.g., solar farms, community gardens, urban agriculture)
* **Investment Risk Assessment:**
 * **Predicting property value appreciation:** Helping investors identify undervalued parcels with high potential.
 * **Assessing the likelihood of development delays:** Identifying potential challenges (environmental concerns, permitting issues) that could delay development.
* **Urban Planning & Policy Making:**
 * **Informing comprehensive plans:** Providing data-driven insights to support land use decisions.
 * **Evaluating the impact of proposed infrastructure projects:** Predicting how new roads or transit lines will affect land values and development patterns.
* **Smart City Applications:**
 * **Real-time monitoring of vacant land:** Tracking changes in land use and identifying opportunities for development.

**IV. Important Considerations & Ethical Implications:**

* **Data Quality:** Garbage in, garbage out! Data must be accurate, complete, and up-to-date.
* **Data Integration:** Combining data from multiple sources can be challenging. Need to address data formats and inconsistencies.
* **Bias in Data:** Historical data may reflect past discriminatory practices. AI models trained on biased data can perpetuate those biases. *Critical to address and mitigate bias.*
* **Privacy Concerns:** Using personal data (e.g., social media data) requires careful consideration of privacy regulations (GDPR, CCPA). Anonymization and aggregation are essential.
* **Transparency & Explainability:** "Black box" AI models can be difficult to understand. Need to strive for transparency and explainability to build trust and accountability. (Techniques like SHAP values can help).
* **Ethical Considerations:** Using AI to predict land use should be done in a way that promotes equity, sustainability, and community engagement.


**To help me refine this further, could you tell me:**

* **What city/region are you focusing on?** (Data availability varies greatly).
* **What specific land uses are you most interested in predicting?** (Residential, commercial, industrial, parks, etc.)
* **What's the primary goal of this prediction?** (Investment, planning, policy-making?)


I hope this comprehensive overview is a helpful starting point! Let me know if you’d like me to dive deeper into any of these areas.

### Model: GPT-4o

Big data and artificial intelligence (AI) techniques can be effectively used to predict the future demand and potential uses of urban vacant land by analyzing historical and current data to identify patterns, trends, and dynamics. Here’s how these technologies can be applied:

1. **Data Collection and Integration:**
 - **Historical Urban Data:** By gathering past urban development records, population growth patterns, land-use changes, and infrastructure developments, AI can recognize long-term trends in land usage.
 - **Socioeconomic Data:** Incorporating demographic, economic, and social data, including employment patterns, income levels, and lifestyle preferences, helps understand the demand for certain types of land use (residential, commercial, industrial, etc.).
 - **Geospatial Data:** Integrating satellite imagery, GIS (Geographic Information Systems), and other geospatial data sources helps analyze land availability and environmental factors that influence land use.

2. **Predictive Modeling:**
 - **Machine Learning Algorithms:** AI techniques like regression analysis, decision trees, and neural networks can predict land use changes by analyzing historical data and socioeconomic factors.
 - **Forecasting Models:** Using time-series analysis, AI can forecast future demand based on past urban expansion, population trends, and economic factors.

3. **Real-Time Data Analysis:**
 - **Traffic and Mobility Data:** By analyzing traffic flow, public transportation routes, and mobility patterns, AI can help forecast the need for certain infrastructure, such as commercial centers or residential areas, based on accessibility and demand.
 - **Sensor Data and IoT:** Integrating data from sensors (e.g., air quality, temperature) can help predict the suitability of vacant land for specific uses, such as green spaces or energy-efficient housing.

4. **Urbanization and Development Trends:**
 - **Urban Simulation Models:** AI can simulate different urbanization scenarios based on current trends, helping to predict how vacant land could be developed to accommodate growth in population or businesses.
 - **Scenario Planning:** Big data can help urban planners analyze multiple development scenarios, considering factors like environmental sustainability, infrastructure requirements, and economic impacts.

5. **Optimization and Resource Allocation:**
 - **Optimal Land Use Allocation:** Using AI, cities can optimize vacant land utilization by suggesting the most economically, socially, and environmentally viable uses. For example, machine learning can identify the ideal combination of residential, commercial, and green spaces.
 - **Automated Decision Support:** AI tools can assist urban planners and policymakers by providing data-driven insights that streamline the decision-making process for land development projects.

By leveraging these techniques, cities can create data-driven, future-proof urban plans, enabling smarter, more efficient use of vacant land amid rapid urbanization.

### Model: RAG+Qwen2.5-72b

Forecasting the future demand and potential uses of urban vacant land (UVL) is a complex task that can greatly benefit from the integration of big data and artificial intelligence (AI) techniques. These tools can analyze vast amounts of historical urban data and current socioeconomic dynamics to uncover patterns and predict future trends. Here's how big data and AI can be employed in this context:

### Data Collection and Integration

#### Historical Urban Data

Collect and integrate historical urban data from various sources, such as land use records, property transactions, census data, traffic patterns, and satellite imagery. This information provides a comprehensive overview of how UVL has been utilized in the past and can help identify potential trends.

#### Current Socioeconomic Dynamics

Gather data on current socioeconomic dynamics, including population growth, employment rates, housing prices, and infrastructure development. These factors can influence the demand for UVL and shape its potential uses. Additionally, consider incorporating real-time data from social media platforms and IoT devices to capture emerging trends and preferences.

### Data-Driven Methods

#### Machine Learning Algorithms

Apply machine learning algorithms to the integrated dataset to identify patterns and correlations. Regression models can be used to forecast future demand based on historical trends, while clustering algorithms can group UVL parcels with similar characteristics to predict their potential uses.

#### Deep Learning Networks

Utilize deep learning networks to analyze complex spatiotemporal data, such as satellite imagery and traffic patterns. Convolutional neural networks (CNNs) can detect changes in land use over time, while recurrent neural networks (RNNs) can model sequential data to predict future trends. Combining these techniques can provide a more accurate and detailed forecast of UVL demand and potential uses.

#### Ensemble Models

Develop ensemble models by combining multiple machine learning algorithms to improve forecasting accuracy. Techniques like bagging, boosting, and stacking can reduce the variance and bias of individual models, leading to more robust predictions. Ensemble models can also handle uncertainties and noise in the data, ensuring more reliable results.

### Predictive Analytics and Visualization

#### Scenario Analysis

Perform scenario analysis to evaluate different future scenarios based on various assumptions and inputs. This can help urban planners and policymakers understand the potential impacts of different policies and interventions on UVL demand and uses. For example, a scenario with increased investment in public transportation may lead to higher demand for mixed-use developments near transit stations.

#### Visualization Tools

Use visualization tools to present the forecasted data in an intuitive and accessible manner. Interactive maps, dashboards, and charts can help stakeholders visualize the predicted trends and patterns, facilitating informed decision-making. Visualizations can also highlight areas of high demand and potential uses, guiding the prioritization of development projects.

### Practical Applications

#### Urban Planning

Urban planners can use the forecasted data to inform long-term planning and development strategies. By anticipating future demand and potential uses of UVL, planners can allocate resources more effectively and design sustainable urban environments. They can also identify areas that require immediate attention, such as parcels with high potential for redevelopment or parcels at risk of degradation.

#### Real Estate Development

Real estate developers can leverage the forecasted data to identify profitable investment opportunities. By understanding future trends and demand, developers can target UVL parcels with high potential returns and tailor their projects to meet the evolving needs of the market. They can also collaborate with urban planners to align their development plans with the overall vision for the city.

#### Community Engagement

Engage the community in the forecasting process by involving them in data collection, analysis, and interpretation. This can help build trust and ensure that the forecasted data reflects the community's needs and preferences. Additionally, transparent communication about the forecasted trends and potential uses can empower residents to participate in shaping the future of their neighborhoods.

In conclusion, integrating big data and AI techniques can significantly enhance the ability to forecast future demand and potential uses of urban vacant land. By leveraging historical urban data and current socioeconomic dynamics, these tools can provide valuable insights for urban planning, real estate development, and community engagement. However, it is essential to address ethical considerations, such as data privacy and algorithmic bias, to ensure that the forecasts are reliable and trustworthy.

### Model: RAG+Llama3.1-70b

Predicting future demand and uses of urban vacant land using big data and AI techniques is a complex task that requires analyzing large amounts of historical urban data and current socioeconomic dynamics. Here's a detailed analysis of the topic:

**Predictive Modeling Techniques:**

1. **Regression Analysis:** Regression analysis can be used to forecast the future demand and potential uses of urban vacant land by analyzing historical data on urban development, demographics, and socioeconomic factors.
2. **Time Series Analysis:** Time series analysis can be used to identify patterns and trends in urban development and vacant land usage over time, allowing for predictions about future demand and uses.
3. **Machine Learning Algorithms:** Machine learning algorithms, such as decision trees, random forests, and neural networks, can be used to analyze large datasets and identify complex relationships between variables.
4. **Deep Learning Techniques:** Deep learning techniques, such as convolutional neural networks (CNNs) and recurrent neural networks (RNNs), can be used to analyze images and time series data to predict future demand and uses of urban vacant land.

**Big Data Sources:**

1. **Urban Planning Data:** Urban planning data, such as zoning regulations, land use patterns, and transportation infrastructure, can be used to predict future demand and uses of urban vacant land.
2. **Demographic Data:** Demographic data, such as population growth, income levels, and education levels, can be used to predict future demand and uses of urban vacant land.
3. **Economic Data:** Economic data, such as GDP growth, unemployment rates, and housing prices, can be used to predict future demand and uses of urban vacant land.
4. **Social Media Data:** Social media data, such as Twitter and Facebook posts, can be used to analyze public sentiment and predict future demand and uses of urban vacant land.

**AI Techniques:**

1. **Natural Language Processing (NLP):** NLP can be used to analyze text data, such as social media posts and news articles, to predict future demand and uses of urban vacant land.
2. **Computer Vision:** Computer vision can be used to analyze images and videos of urban development and vacant land usage to predict future demand and uses.
3. **Predictive Analytics:** Predictive analytics can be used to analyze large datasets and predict future demand and uses of urban vacant land.
4. **Geographic Information Systems (GIS):** GIS can be used to analyze spatial data and predict future demand and uses of urban vacant land.

**Challenges and Limitations:**

1. **Data Quality:** The quality of the data used to predict future demand and uses of urban vacant land is crucial. Poor data quality can lead to inaccurate predictions.
2. **Model Complexity:** The complexity of the models used to predict future demand and uses of urban vacant land can make it difficult to interpret the results.
3. **Socioeconomic Dynamics:** Socioeconomic dynamics, such as changes in population growth and economic conditions, can make it challenging to predict future demand and uses of urban vacant land.
4. **Urbanization:** Urbanization can lead to rapid changes in urban development and vacant land usage, making it challenging to predict future demand and uses.

**Conclusion:**

Predicting future demand and uses of urban vacant land using big data and AI techniques is a complex task that requires analyzing large amounts of historical urban data and current socioeconomic dynamics. By leveraging predictive modeling techniques, big data sources, and AI techniques, urban planners and policymakers can make more informed decisions about urban development and vacant land usage. However, there are challenges and limitations to consider, such as data quality, model complexity, socioeconomic dynamics, and urbanization.

### Model: RAG+Deepseek-R1-70b

To predict the future demand and uses of urban vacant land using big data and AI, we can follow a structured approach that leverages data-driven insights and advanced analytical techniques. Here's a step-by-step explanation:

1. **Data Collection:**
 - **Demographic Data:** Gather data on population growth, migration patterns, and demographic shifts within the city.
 - **Economic Data:** Collect information on employment rates, income levels, and economic trends that influence land use.
 - **Environmental Data:** Include data on climate patterns, soil conditions, and other environmental factors affecting land suitability.
 - **Spatial Data:** Utilize GIS to map vacant land locations relative to key infrastructure like roads, schools, and businesses.

2. **Data Integration:**
 - **Combine Datasets:** Integrate demographic, economic, environmental, and spatial data to create a comprehensive dataset.
 - **Ensure Data Quality:** Clean and preprocess the data to handle missing values, inconsistencies, and ensure accuracy.

3. **AI and Machine Learning:**
 - **Predictive Modeling:** Use machine learning algorithms (e.g., random forests, neural networks) to predict future land use patterns based on historical trends and current data.
 - **Natural Language Processing (NLP):** Analyze urban planning documents and community feedback to understand qualitative aspects of land use preferences.
 - **Real-Time Data Feeds:** Incorporate real-time data on economic indicators and population shifts to adapt predictions dynamically.

4. **Spatial Analysis:**
 - **GIS Mapping:** Use GIS to analyze the spatial relationships between vacant land and existing infrastructure, identifying areas with high potential for development.
 - **Urban Planning Insights:** Integrate insights from urban planning reports to align predictions with long-term city development goals.

5. **Stakeholder Engagement:**
 - **Collaboration:** Involve urban planners, policymakers, and community members in the planning process to ensure predictions align with community needs and goals.
 - **Feedback Loop:** Create a feedback mechanism to refine predictions based on stakeholder input and changing conditions.

6. **Implementation and Monitoring:**
 - **Decision Support Systems:** Develop decision support systems that provide actionable recommendations based on predictive models.
 - **Monitoring and Adaptation:** Continuously monitor land use changes and update predictions to reflect new data and evolving conditions.

By following this approach, cities can harness the power of big data and AI to make informed decisions about urban vacant land, ensuring sustainable and equitable development that meets the needs of the community.

### Model: RAG+Gemma3-27b

Predicting future demand and potential uses of urban vacant land requires a robust, data-driven approach leveraging the power of big data and artificial intelligence. Here’s a detailed framework:

**1. Data Acquisition & Integration:**

* **Historical Land Use Data:** Zoning records, property transactions, building permits, and historical aerial imagery.
* **Demographic Data:** Population density, age distribution, income levels, household size, migration patterns (from census data, surveys, and mobile phone data).
* **Economic Data:** Employment rates, industry trends, commercial property values, business licenses, and investment patterns.
* **Transportation Data:** Road networks, public transit routes, traffic patterns, and accessibility metrics.
* **Environmental Data:** Soil conditions, flood zones, environmental hazards, green space availability, and air quality.
* **Social Media Data:** Sentiment analysis of social media posts related to urban development and vacant land (with privacy safeguards).
* **Geospatial Data:** GIS layers including parcel boundaries, building footprints, infrastructure networks, and points of interest.

**2. Data Preprocessing & Feature Engineering:**

* **Data Cleaning:** Addressing missing values, inconsistencies, and errors in the data.
* **Data Transformation:** Converting data into appropriate formats for AI algorithms (e.g., normalization, standardization).
* **Feature Selection:** Identifying the most relevant variables for predicting land use.
* **Feature Engineering:** Creating new variables by combining existing data (e.g., a “Vacancy Index” combining vacancy rate, property values, and crime rates; a “Development Pressure Index” combining population growth and economic activity).

**3. AI Modeling Techniques:**

* **Time Series Analysis:** Forecasting future trends in vacancy rates and land use changes using techniques like ARIMA and Prophet.
* **Regression Models:** Predicting land value and potential development yield based on various factors.
* **Machine Learning Algorithms:**
 * **Random Forests:** Identifying important predictors of land use and classifying vacant land based on potential uses.
 * **Support Vector Machines (SVM):** Classifying vacant land based on its characteristics.
 * **Neural Networks (Deep Learning):** Capturing complex relationships between variables and predicting land use patterns.
* **Spatial Analysis:**
 * **Geographically Weighted Regression (GWR):** Accounting for spatial heterogeneity in land use patterns.
 * **Spatial Autocorrelation Analysis:** Identifying clusters of vacant land and predicting future development hotspots.

**4. Model Validation & Evaluation:**

* **Cross-Validation:** Splitting the data into training and testing sets to evaluate model performance.
* **Accuracy Metrics:** Using appropriate metrics (e.g., R-squared, RMSE, precision, recall) to assess the accuracy of the models.
* **Sensitivity Analysis:** Identifying the most influential variables and assessing the impact of changes in those variables.

**5. Deployment & Monitoring:**

* **Interactive Mapping Tools:** Creating interactive maps that visualize predicted land use patterns and potential development scenarios.
* **Decision Support Systems:** Developing tools that assist urban planners and policymakers in making informed decisions about vacant land.
* **Real-Time Data Integration:** Continuously updating the models with new data to improve accuracy and responsiveness.
* **Feedback Loops:** Establishing mechanisms for gathering feedback from stakeholders and incorporating it into the models.

**6. Ethical Considerations:**

* **Data Privacy:** Ensuring the privacy of individuals and protecting sensitive data.
* **Bias Mitigation:** Identifying and mitigating potential biases in the data and algorithms.
* **Transparency & Explainability:** Making the models transparent and explainable to stakeholders.

**Conclusion:**

By integrating diverse datasets, applying appropriate AI techniques, and addressing ethical considerations, cities can gain valuable insights into the future demand and potential uses of urban vacant land. This data-driven approach empowers urban planners and policymakers to make informed decisions that promote sustainable and equitable urban development. Continuous monitoring, model refinement, and stakeholder engagement are crucial for ensuring the long-term success of these predictive efforts.

### Model: RAG+GPT-4o

Predicting the future demand and potential uses of urban vacant land through big data and AI involves a comprehensive approach that integrates diverse datasets and sophisticated analytical techniques. Here's how this can be achieved:

**1. Data Collection and Integration:**

- **Historical Urban Data:** Gather data on past land use, zoning changes, infrastructure developments, and historical population trends.
- **Socioeconomic Data:** Include current and projected demographic information, income levels, employment rates, and migration patterns.
- **Environmental Data:** Consider environmental factors such as climate conditions, topography, and existing green spaces.
- **Real Estate Market Trends:** Collect data on property values, vacancy rates, and real estate transactions.
- **Transportation and Accessibility:** Incorporate data on public transit routes, road networks, and accessibility metrics.
- **Social Media and Public Sentiment:** Analyze social media posts and community feedback to gauge public perceptions and preferences.

**2. AI and Machine Learning Techniques:**

- **Predictive Modeling:** Use machine learning algorithms like regression analysis, decision trees, and neural networks to identify patterns and predict future land use scenarios.
- **Time Series Analysis:** Employ time series models to forecast trends in population growth, economic activity, and land use changes.
- **Natural Language Processing (NLP):** Utilize NLP to analyze textual data from planning documents, news articles, and social media to understand qualitative factors influencing land use.
- **Geospatial Analysis:** Apply GIS tools and spatial algorithms to examine the spatial distribution of vacant land and assess its potential connectivity to urban infrastructure.

**3. Scenario Development and Simulation:**

- **Urban Growth Scenarios:** Develop scenarios that simulate different urban growth patterns based on varying assumptions about population growth, economic development, and policy changes.
- **Impact Assessment:** Evaluate the potential impacts of different land use scenarios on factors such as traffic congestion, environmental sustainability, and community well-being.

**4. Decision Support Systems:**

- **Interactive Dashboards:** Create dashboards that visualize data insights and predictions, allowing urban planners and policymakers to explore different scenarios and make informed decisions.
- **Stakeholder Engagement:** Involve community stakeholders in the decision-making process by providing access to data-driven insights and soliciting feedback on proposed land use changes.

**5. Continuous Monitoring and Adaptation:**

- **Real-Time Data Integration:** Continuously update models with real-time data feeds to improve accuracy and responsiveness to changing conditions.
- **Adaptive Learning Algorithms:** Implement adaptive algorithms that refine predictions as new data becomes available and urban dynamics evolve.

**6. Ethical Considerations:**

- **Data Privacy and Security:** Ensure that data collection and analysis comply with privacy regulations and protect sensitive information.
- **Bias Mitigation:** Address potential biases in data and models to ensure equitable and inclusive outcomes for all communities.

By leveraging big data and AI, cities can gain valuable insights into the future demand and potential uses of urban vacant land, enabling them to plan for sustainable and resilient urban development. This approach empowers decision-makers to anticipate changes, optimize land use, and enhance the quality of life for urban residents.

## TOPIC4: Quantifying and Maximizing the Ecological Value of Vacant Urban Land through Planning.

## -How can the ecological value of vacant urban land be quantified, especially in terms of biodiversity conservation, rainwater management, and carbon sequestration?

## -What urban planning strategies can be implemented to maximize these ecological functions in support of sustainable urban development?

### Model: Qwen2.5-7b

Quantifying and maximizing the ecological value of vacant urban land is a crucial aspect of sustainable urban development. This involves understanding how different types of vacant lands contribute to biodiversity conservation, rainwater management, and carbon sequestration, as well as implementing strategic planning measures that enhance these functions.

### Quantification of Ecological Value

1. Biodiversity Conservation:
- Species Inventory: Conduct a thorough inventory of plant and animal species present on the land.
- Habitat Suitability Analysis: Assess the suitability of the vacant land for various wildlife habitats using GIS tools to overlay data on vegetation, water bodies, and other ecological features.
- Biodiversity Indices: Use indices such as the Shannon-Wiener Index or Simpson's Diversity Index to quantify biodiversity.

2. Rainwater Management:
- Hydrological Modeling: Utilize hydrological models to simulate how rainwater flows across the land surface and interacts with existing infrastructure.
- Runoff Reduction Potential: Measure the potential of the vacant land to reduce runoff through features like permeable surfaces, green roofs, or rain gardens.
- Water Quality Assessment: Evaluate the land's capacity to filter pollutants from stormwater.

3. Carbon Sequestration:
- Vegetation Carbon Stocks: Estimate carbon stocks in existing vegetation using remote sensing and field measurements.
- Soil Organic Matter: Assess soil organic matter content, which is a significant component of urban carbon storage.
- Ecosystem Services Modeling: Use models to predict the overall carbon sequestration potential based on land use scenarios.

### Urban Planning Strategies

1. Green Infrastructure Integration:
- Incorporate green roofs, living walls, and permeable pavements into vacant lands to enhance biodiversity and manage stormwater.
- Create green corridors that connect different parts of the city, promoting wildlife movement and enhancing urban biodiversity.

2. Urban Forestry Programs:
- Plant native species that support local ecosystems and provide habitat for wildlife.
- Establish community gardens and parks on vacant lots to increase green space and improve air quality.

3. Sustainable Land Use Planning:
- Prioritize the use of vacant lands for public amenities such as playgrounds, sports fields, or community centers, which can also serve ecological functions.
- Implement zoning regulations that encourage mixed-use development with integrated green spaces.

4. Eco-Engineering Solutions:
- Design stormwater management systems that mimic natural hydrological processes, such as constructed wetlands and rain gardens.
- Use permeable materials in paving to allow water infiltration and reduce runoff.

5. Community Engagement and Education:
- Involve local communities in the planning process to ensure that ecological benefits are aligned with social needs.
- Educate residents about the importance of vacant land management for environmental health and sustainability.

6. Policy and Financial Incentives:
- Develop policies that incentivize private developers to incorporate green infrastructure into their projects on vacant lands.
- Provide financial support through grants or low-interest loans for community-led initiatives aimed at ecological restoration.

### Conclusion

By quantifying the ecological value of vacant urban land and implementing strategic planning measures, cities can significantly enhance biodiversity conservation, improve rainwater management, and increase carbon sequestration. These efforts not only contribute to environmental sustainability but also foster social well-being and economic resilience in urban areas.

### Model: Llama3.1-8b

Quantifying and maximizing the ecological value of vacant urban land is crucial for creating sustainable cities that balance human needs with environmental protection. Here's a comprehensive approach to addressing this topic:

Quantifying Ecological Value

To quantify the ecological value of vacant urban land, consider the following metrics:

1. Biodiversity Conservation:
 -Species richness and abundance
 -Habitat quality and diversity (e.g., vegetation types, water bodies)
 -Connectivity to surrounding green spaces and wildlife corridors
2. Rainwater Management:
 -Surface runoff reduction through infiltration and evapotranspiration
 -Groundwater recharge rates
 -Stormwater management infrastructure (e.g., rain gardens, bioswales)
3. Carbon Sequestration:
 -Vegetation cover and biomass accumulation
 -Soil carbon storage and sequestration potential
 -Emissions reduction through avoided urban heat island effects

Urban Planning Strategies

To maximize the ecological value of vacant urban land, implement these strategies:

1. Green Infrastructure:
 -Design and install green roofs, walls, and facades to reduce stormwater runoff and increase biodiversity
 -Create rain gardens, bioswales, and other low-impact development features for stormwater management
2. Urban Forestry:
 -Plant native tree species to enhance biodiversity, mitigate urban heat island effects, and sequester carbon
 -Develop urban forest management plans to ensure long-term sustainability
3. Ecological Restoration:
 -Restore degraded or abandoned sites to their natural state through invasive species removal, soil remediation, and habitat creation
 -Engage local communities in restoration efforts to foster ownership and stewardship
4. Infill Development:
 -Design compact, walkable neighborhoods with mixed-use development to reduce urban sprawl and promote efficient land use
 -Incorporate green spaces and community gardens into infill developments to enhance ecological value
5. Policy and Regulation:
 -Develop and enforce zoning regulations that prioritize ecological conservation and sustainable development
 -Offer incentives for developers to incorporate green infrastructure and ecological restoration into their projects

Case Studies and Best Practices

-The High Line in New York City, USA, transformed an abandoned elevated rail line into a vibrant green space with native vegetation, public art, and community programming.
-The Green Infrastructure Plan in Chicago, USA, aims to reduce stormwater runoff by 20% through the installation of green roofs, rain gardens, and other low-impact development features.
-The Urban Forestry Program in Toronto, Canada, has planted over 1 million trees since its inception, enhancing biodiversity, mitigating urban heat island effects, and sequestering carbon.

By adopting these strategies and metrics, cities can effectively quantify and maximize the ecological value of vacant urban land, supporting sustainable development and creating healthier, more resilient communities.

### Model: Deepseek-R1-7b

To address the ecological value of vacant urban land through planning, we can focus on three key areas: biodiversity conservation, rainwater management, and carbon sequestration. Here's a structured approach to quantify these values and implement effective urban planning strategies:

### 1. Quantifying Ecological Value

- Biodiversity Conservation:
 - Measure species richness using metrics like the Simpson's diversity index.
 - Assess habitat quality through indicators such as vegetation cover, water bodies, and nesting sites.

- Rainwater Management:
 - Evaluate efficiency through water catchment systems, permeable pavements, and green infrastructure.
 - Use the Rational Method to estimate runoff reduction potential.

- Carbon Sequestration:
 - Estimate CO2 absorption using models based on vegetation type (trees, grass) and density.
 - Apply data from forested areas to vacant land for initial assessments.

### 2. Urban Planning Strategies

- Land Use Zoning: Designate areas as green spaces or recreational zones with zoning laws supporting sustainable practices.

- Green Infrastructure: Implement permeable pavements, green roofs, and walls to enhance water management and carbon capture.

- Innovation Integration: Incorporate renewable energy sources like solar panels on green roofs or microhydro systems near water bodies.

- Sustainability Incentives: Offer tax breaks, subsidies, and community ownership models for landowners and developers.

### 3. Social Equity and Accessibility

Ensure green spaces are accessible to all residents through public-private partnerships and inclusive design principles.

### 4. Monitoring and Evaluation

Set up metrics using GIS mapping to track biodiversity, water management efficiency, and carbon sequestration over time, allowing for adjustments based on effectiveness.

### 5. Long-term Maintenance and Equity

Consider maintenance strategies and ensure equitable access and benefits through community engagement and partnerships.

By integrating these components, urban planning can effectively maximize the ecological value of vacant land, supporting sustainable development while addressing biodiversity, water management, and carbon sequestration needs.

### Model: Gemma3-4b

Okay, Topic 4 – Quantifying and Maximizing the Ecological Value of Vacant Urban Land – is a critical area for sustainable urban development. Let’s break down the key aspects and potential strategies.

**1. Quantifying Ecological Value – Moving Beyond Qualitative Assessments:**

The core challenge is shifting from simply *describing* vacant land as “potentially valuable” to rigorously *measuring* its ecological contributions. This requires a multi-faceted approach:

* **Biodiversity Conservation:**
 * **Species Inventories:** Detailed surveys to identify existing flora and fauna – using citizen science, drone-based surveys, and expert ecological assessments.
 * **Habitat Mapping:** Creating maps of different habitat types within the vacant land, based on vegetation structure, soil conditions, and water availability.
 * **Connectivity Analysis:** Using GIS to assess how the vacant land connects to existing green corridors and natural areas – crucial for wildlife movement and gene flow.
 * **Index-Based Metrics:** Employing indices like the Shannon Diversity Index or Simpson's Index to quantify biodiversity levels.

* **Rainwater Management:**
 * **Hydrological Modeling:** Using GIS and hydrological models to assess the land's capacity to absorb and infiltrate rainwater.
 * **Impervious Surface Area Calculation:** Measuring the proportion of the land covered by impervious surfaces (roads, buildings) – a key driver of runoff.
 * **Soil Moisture Monitoring:** Installing sensors to track soil moisture levels and assess the land’s ability to recharge groundwater.
 * **Runoff Reduction Metrics:** Tracking the volume and velocity of stormwater runoff.

* **Carbon Sequestration:**
 * **Aboveground Biomass Estimation:** Using remote sensing data (LiDAR, satellite imagery) and ground-based measurements to estimate the amount of carbon stored in vegetation.
 * **Soil Carbon Assessment:** Measuring soil organic carbon content – a significant carbon sink.
 * **Carbon Flux Modeling:** Using models to predict the rate of carbon uptake and release from the land.

**2. Urban Planning Strategies to Maximize Ecological Functions:**

Once ecological value is quantified, strategic planning can be implemented:

* **Green Infrastructure Integration:**
 * **Rain Gardens & Bioswales:** Creating shallow depressions to capture and filter stormwater runoff.
 * **Permeable Pavement:** Reducing impervious surfaces and allowing rainwater to infiltrate.
 * **Green Roofs & Walls:** Adding vegetation to building surfaces to enhance biodiversity and reduce stormwater runoff.

* **Habitat Restoration & Creation:**
 * **Native Plantings:** Using native species to provide food and shelter for local wildlife.
 * **Woodland Patches:** Creating small, fragmented woodlands to support biodiversity.
 * **Wildlife Corridors:** Connecting fragmented habitats to facilitate wildlife movement.

* **Strategic Zoning & Land Use Planning:**
 * **Buffer Zones:** Establishing vegetated buffer zones around sensitive areas (e.g., wetlands, streams).
 * **Mixed-Use Development:** Integrating green spaces within urban development to support biodiversity and reduce stormwater runoff.

* **Community Engagement & Stewardship:**
 * **Citizen Science Programs:** Involving residents in ecological monitoring and restoration efforts.
 * **Volunteer Programs:** Engaging volunteers in habitat restoration and maintenance.

**3. Connecting to Existing Research (Context 3):**

* **Context 3’s** focus on landscape connectivity is absolutely vital. The AI-driven approach can help prioritize vacant land parcels that contribute most significantly to this connectivity. The research question regarding 'how do potential vacant lot development scenarios impact landscape connectivity?' is directly relevant here.

**4. Key Considerations & Future Research:**

* **Adaptive Management:** Recognizing that ecological systems are dynamic and require ongoing monitoring and adjustments.
* **Social-Ecological Systems:** Considering the interactions between ecological and social systems – ensuring that planning decisions are aligned with community values and needs.
* **Cost-Benefit Analysis:** Incorporating the full range of ecological benefits (e.g., carbon sequestration, improved air quality, reduced flood risk) into cost-benefit analyses.

To help me refine this response and explore specific areas of interest, could you tell me:

* Are you particularly interested in a specific type of ecosystem (e.g., urban forest, brownfield site, riparian area)?
* Are there any specific ecological metrics you’d like to explore in more detail (e.g., carbon sequestration rates, stormwater runoff reduction)?

### Model: GPT-4o-mini

Quantifying and maximizing the ecological value of vacant urban land is a critical step toward fostering sustainable urban environments. Here's how we can approach quantification and what urban planning strategies can effectively enhance ecological functions such as biodiversity conservation, rainwater management, and carbon sequestration.

### Quantifying Ecological Value

1. Biodiversity Conservation:
- Biodiversity Indices: Use metrics like the Shannon Index or Simpson’s Diversity Index to assess species richness and distribution in vacant urban land. This involves surveying flora and fauna present in those areas.
- Habitat Mapping: Create maps that identify and classify different habitats within the vacant land. This helps in recognizing which species are supported and the overall ecological functionality.
- Ecological Function Assessment: Evaluate the role of vacant land in supporting ecosystem services, such as pollination, pest control, and soil health.

2. Rainwater Management:
- Hydrological Modeling: Use models to assess how much rainwater can be absorbed, retained, or filtered through vacant land. This includes estimating infiltration rates and runoff coefficients.
- Water Quality Testing: Analyze the capacity of vacant land to filter pollutants and manage stormwater before it enters drainage systems.
- Green Infrastructure Metrics: Implement measures such as the percentage of permeable surfaces or the presence of bioswales and rain gardens to evaluate water management effectiveness.

3. Carbon Sequestration:
- Carbon Storage Calculations: Use standard models to estimate the carbon sequestration potential of vegetation types present in the area, factoring in tree canopy cover, soil quality, and biomass.
- Life Cycle Analysis (LCA): Assess the long-term carbon impact of transforming vacant land into green spaces versus developed land.
- Soil Carbon Stocks: Measure soil organic carbon levels to establish the capacity of the land to store carbon, using soil sampling and analysis.

### Urban Planning Strategies

1. Green Infrastructure Implementation:
- Community Gardens and Urban Farms: Encourage the transformation of vacant lots into community gardens or urban farms to foster biodiversity, promote local food production, and improve community well-being.
- Parks and Green Corridors: Develop parks that connect existing green spaces to create ecological networks, increasing habitat for wildlife and enhancing biodiversity.
- Permeable Surfaces: Install permeable paving in parking lots and pathways to enhance infiltration and reduce runoff.

2. Ecological Zoning Regulations:
- Create Specific Zones: Designate areas for conservation, habitat restoration, or re-greening within urban planning frameworks to prioritize ecological functions.
- Biodiversity Offsetting: Implement policies that allow developers to offset biodiversity loss in one area by enhancing or conserving biodiversity in another.

3. Community Engagement and Stewardship:
- Involve Local Communities: Engage residents in the planning and management of vacant land; community-supported initiatives can foster a sense of ownership and stewardship.
- Educational Programs: Promote awareness about the ecological value of vacant land through workshops and programs that encourage planting native species and maintaining green spaces.

4. Collaboration with Local Ecologists and Urban Planners:
- Interdisciplinary Approaches: Foster collaborations between urban planners, ecologists, and landscape architects to ensure that ecological considerations are embedded in urban designs.
- Adaptive Planning: Implement flexible planning frameworks that allow for ecological assessments to adapt to changes in land use or environmental conditions.

### Conclusion

Maximizing the ecological value of vacant urban land through careful planning can significantly contribute to sustainable urban development. By quantifying biodiversity, rainwater management, and carbon sequestration, stakeholders can make informed decisions that prioritize ecological resilience, enhance urban livability, and mitigate climate change impacts. The integration of green infrastructure and community participation will further enhance the ecological potential of these spaces, creating vibrant urban ecosystems that benefit both nature and residents.

### Model: Qwen-2.5-72b

### Quantifying and Maximizing the Ecological Value of Vacant Urban Land through Planning

#### 1. Quantifying the Ecological Value of Vacant Urban Land

##### a. Biodiversity Conservation
- **Species Inventory**: Conducting a detailed inventory of plant and animal species present on the vacant land. This can be done through field surveys, remote sensing, and citizen science initiatives.
- **Habitat Quality Assessment**: Evaluating the quality of habitats by assessing factors such as soil health, water availability, and vegetation structure. Tools like the Habitat Suitability Index (HSI) can be used.
- **Connectivity Analysis**: Using Geographic Information Systems (GIS) to assess the connectivity of the vacant land to other green spaces, which is crucial for species migration and genetic diversity.

##### b. Rainwater Management
- **Runoff Reduction**: Measuring the amount of stormwater runoff that the land can absorb compared to impervious surfaces. This can be done using rainfall simulators and soil infiltration tests.
- **Water Quality Improvement**: Assessing the land's ability to filter pollutants from stormwater using techniques like water quality monitoring and chemical analysis.
- **Flood Mitigation**: Evaluating the potential for the land to act as a natural buffer against flooding by modeling water flow and storage capacity.

##### c. Carbon Sequestration
- **Vegetation Carbon Storage**: Measuring the amount of carbon stored in trees, shrubs, and other vegetation using allometric equations and biomass assessments.
- **Soil Carbon Storage**: Analyzing the carbon content in the soil through soil sampling and laboratory analysis.
- **Carbon Flux Monitoring**: Using eddy covariance towers and other instruments to measure the exchange of carbon dioxide between the land and the atmosphere.

#### 2. Urban Planning Strategies to Maximize Ecological Functions

##### a. Biodiversity Conservation
- **Green Corridors**: Creating and maintaining green corridors to connect fragmented habitats and enhance species movement.
- **Native Planting**: Encouraging the use of native plants that provide food and habitat for local wildlife.
- **Wildlife-Friendly Design**: Incorporating features such as bird boxes, bee hotels, and pollinator gardens to support biodiversity.

##### b. Rainwater Management
- **Green Infrastructure**: Implementing green roofs, rain gardens, and permeable pavements to manage stormwater and reduce runoff.
- **Wetland Restoration**: Restoring or creating wetlands to improve water quality and provide habitat for aquatic species.
- **Rainwater Harvesting**: Installing systems to collect and store rainwater for non-potable uses, reducing the demand on municipal water supplies.

##### c. Carbon Sequestration
- **Afforestation and Reforestation**: Planting trees and restoring forests on vacant land to increase carbon storage.
- **Agroforestry**: Integrating trees with agricultural practices to enhance carbon sequestration and provide additional ecosystem services.
- **Soil Management**: Implementing practices such as no-till farming and composting to improve soil health and increase carbon storage.

#### 3. Integrated Approaches
- **Ecological Urban Design**: Combining principles of urban design with ecological science to create multifunctional green spaces that support biodiversity, manage stormwater, and sequester carbon.
- **Community Engagement**: Involving local communities in the planning and management of vacant land to ensure long-term sustainability and social acceptance.
- **Policy and Regulation**: Developing policies and regulations that incentivize the ecological restoration and management of vacant urban land, such as tax breaks, grants, and zoning laws.

#### 4. Case Studies and Best Practices
- **Philadelphia's Green City, Clean Waters Program**: A comprehensive plan that uses green infrastructure to manage stormwater and improve water quality.
- **Singapore's City in a Garden**: An urban planning strategy that integrates green spaces and biodiversity conservation into the city's development.
- **Cleveland's Re-Imagining a More Sustainable Cleveland**: A program that transforms vacant lots into community gardens, parks, and green spaces.

By quantifying the ecological value of vacant urban land and implementing strategic urban planning, cities can enhance their sustainability, resilience, and quality of life.

### Model: Llama-3.1-70b

Quantifying and maximizing the ecological value of vacant urban land is essential for sustainable urban development. Here are some ways to quantify ecological value and urban planning strategies to maximize biodiversity conservation, rainwater management, and carbon sequestration:

**Quantifying Ecological Value:**

1. **Biodiversity Conservation:**
 * Conduct species surveys to identify flora and fauna present on the vacant land.
 * Use metrics such as species richness, diversity indices (e.g., Shannon Index), and habitat quality assessments.
 * Map and analyze the spatial distribution of species and habitats.
2. **Rainwater Management:**
 * Assess the site's hydrological characteristics, including slope, soil type, and drainage patterns.
 * Use models such as the US Environmental Protection Agency's Storm Water Management Model (SWMM) to estimate stormwater runoff and infiltration rates.
 * Calculate the potential for rainwater harvesting and greywater reuse.
3. **Carbon Sequestration:**
 * Analyze soil carbon content and measure soil organic matter.
 * Estimate the potential for carbon sequestration through vegetation, such as tree planting and urban forests.
 * Use models like the Urban Forest Effects (UFORE) model to quantify carbon storage and sequestration.

**Urban Planning Strategies:**

1. **Biodiversity Conservation:**
 * Create habitat restoration plans, incorporating native plant species and designing for wildlife corridors.
 * Implement urban agriculture and community gardening initiatives to promote ecological connectivity.
 * Establish green spaces, parks, and gardens to support local biodiversity.
2. **Rainwater Management:**
 * Design green infrastructure, such as green roofs, rain gardens, and bioswales, to manage stormwater runoff.
 * Implement low-impact development (LID) strategies, including permeable pavements and rainwater harvesting systems.
 * Promote decentralised water management through on-site treatment and reuse.
3. **Carbon Sequestration:**
 * Develop urban forestry plans, prioritizing native tree species and designing for maximum carbon sequestration.
 * Implement green infrastructure, such as green walls and green roofs, to reduce urban heat islands.
 * Promote eco-friendly urban design, incorporating carbon-sequestering materials and reducing energy consumption.

**Additional Strategies:**

1. **Integrate vacant land into urban planning:**
 * Incorporate vacant land into comprehensive urban plans, zoning regulations, and development policies.
 * Encourage community engagement and participation in planning processes.
2. **Monitor and evaluate ecological performance:**
 * Establish monitoring programs to track ecological indicators, such as biodiversity, water quality, and carbon sequestration.
 * Use data-driven approaches to evaluate the effectiveness of urban planning strategies.
3. **Foster collaboration and partnerships:**
 * Collaborate with stakeholders, including community groups, NGOs, and private developers, to promote sustainable urban development.
 * Establish partnerships to leverage resources, expertise, and funding for ecological urban planning initiatives.

By quantifying ecological value and implementing these urban planning strategies, cities can maximize the ecological functions of vacant urban land, supporting sustainable urban development and improving the quality of life for urban residents.

### Model: Deepseek-R1-70b

To address the ecological value of vacant urban land, we can follow a structured approach focusing on quantification and strategic planning across biodiversity conservation, rainwater management, and carbon sequestration.

### Quantifying Ecological Value

1. **Biodiversity Conservation**
 - **Species Richness and Abundance:** Use indices like the Shannon Diversity Index to assess the variety and abundance of species.
 - **Habitat Quality:** Evaluate the condition of habitats, considering factors like native vegetation and connectivity to other habitats.

2. **Rainwater Management**
 - **Infiltration and Runoff:** Measure using coefficients that classify surfaces by water infiltration and runoff.
 - **Groundwater Recharge:** Employ hydrological models tosimulate water movement and recharge.

3. **Carbon Sequestration**
 - **Soil Organic Carbon:** Measure through soil samples and lab analysis.
 - **Vegetation Carbon Stock:** Use biomass calculations and remote sensing tools like LiDAR.

### Maximizing Ecological Value Through Urban Planning

1. **Zoning Regulations:** Protect natural areas by designating them as green spaces.
2. **Green Infrastructure Incentives:** Offer tax breaks or grants for sustainable land use practices.
3. **Community Engagement:** Involve residents in planning to foster investment in ecological spaces.
4. **Multifunctional Green Spaces:** Design spaces that serve both recreational and ecological purposes, using native plants.
5. **Permeable Materials:** Incorporate materials that enhance water infiltration in urban design.
6. **Green Corridors:** Connect green spaces to support biodiversity movement.
7. **Temporary Use Strategies:** Utilize vacant land as pop-up gardens or green spaces.
8. **Green Infrastructure Networks:** Plan interconnected systems of green spaces.
9. **Monitoring and Adaptive Management:** Use sensors and citizen science for ongoing assessment and adjustment.
10. **Policy Alignment and Funding:** Ensure integrated strategies across government levels and secure funding through public-private partnerships.

### Case Studies and Examples
- **Singapore:** Exemplary green infrastructure integration.
- **New York High Line:** Transformation of underused space into an ecological park.

By systematically quantifying ecological values and implementing tailored strategies, urban areas can enhance sustainability and ecological health.

### Model: Gemma-3-27b

Okay, I can definitely help you explore the topic of Quantifying and Maximizing the Ecological Value of Vacant Urban Land through Planning! This is a *really* important area for sustainable urban development. Here's a breakdown of how we can approach this, covering quantification methods, planning strategies, and things to consider. I'll try to be as comprehensive as possible, and will break it down into sections for clarity.

**I. Quantifying Ecological Value**

The biggest challenge is turning something often seen as "waste space" into something measurable in terms of ecological benefits. Here's how we can do that, broken down by the key areas you mentioned:

* **Biodiversity Conservation:** This is complex, but several methods exist:
 * **Species Inventories:** The most direct method. Conduct surveys to identify plant and animal species present on the vacant land. Focus on indicator species (species that reflect overall ecosystem health) and species of conservation concern. This provides a baseline and allows tracking changes over time. Citizen science initiatives can help with data collection!
 * **Habitat Assessments:** Evaluate the *quality* of habitats present. This considers factors like vegetation structure, presence of nesting sites, food sources, connectivity to other green spaces, and levels of disturbance. Tools like the Habitat Quality Assessment (HQA) can be useful.
 * **Index of Biological Integrity (IBI):** Developed for aquatic ecosystems, but adapted for terrestrial ones. IBIs use multiple metrics (species richness, community composition, habitat structure) to score ecosystem health.
 * **Remote Sensing & GIS:** Use aerial imagery (drones are *excellent* for this!), satellite data, and GIS to map vegetation cover, identify potential habitats, and assess connectivity. Indices like the Normalized Difference Vegetation Index (NDVI) can indicate vegetation health.
 * **eDNA analysis:** Analyzing environmental DNA (from soil, water, air) can detect species presence even without direct observation.
* **Rainwater Management:** Quantifying this focuses on the land's ability to absorb and filter water.
 * **Infiltration Rates:** Measure how quickly water soaks into the soil. This is crucial for understanding the land's ability to reduce runoff.
 * **Runoff Coefficient:** Calculate the proportion of rainfall that becomes runoff versus being absorbed. Vacant land with compacted soil will have a higher runoff coefficient.
 * **Water Storage Capacity:** Estimate the amount of water the soil can hold. Soil type, depth, and organic matter content are key factors.
 * **Stormwater Detention Volume:** If the land is designed with features like swales or depressions, calculate its capacity to temporarily store stormwater.
 * **Modeling:** Use hydrologic models (like SWMM – Storm Water Management Model) to simulate runoff and infiltration under different rainfall scenarios.
* **Carbon Sequestration:** This involves estimating the amount of carbon stored in vegetation and soil.
 * **Biomass Estimation:** Measure the aboveground biomass (trees, shrubs, herbaceous plants) and belowground biomass (roots). This can be done through allometric equations (relationships between tree dimensions and biomass) or direct measurement (which is more difficult).
 * **Soil Organic Carbon (SOC) Analysis:** Analyze soil samples to determine the amount of carbon stored in the soil. Healthy, undisturbed soils have higher SOC levels.
 * **Carbon Sequestration Rate:** Estimate the rate at which carbon is being removed from the atmosphere and stored. This requires long-term monitoring.
 * **i-Tree Eco:** A software tool specifically designed to quantify the ecosystem services provided by trees, including carbon sequestration.

**Important Considerations for Quantification:**

* **Baseline Data:** You *need* to know the "before" condition to measure improvement.
* **Context Matters:** The ecological value will vary depending on the location (e.g., a vacant lot in a highly urbanized area will be more valuable than one in a rural-urban fringe).
* **Multiple Benefits:** Don’t just focus on one metric. A piece of land can provide multiple ecological services simultaneously.


**II. Urban Planning Strategies to Maximize Ecological Functions**

Now, how do we *plan* to make the most of this potential?

* **Green Infrastructure Integration:** Treat vacant land as an integral part of the city's green infrastructure network. This means connecting it to existing parks, greenways, and natural areas.
 * **Corridors:** Create wildlife corridors to allow animals to move between habitats.
 * **Stepping Stones:** Small patches of habitat that serve as “stepping stones” for dispersal.
* **Strategic Site Design:**
 * **Native Plantings:** Prioritize native plant species, which are adapted to the local climate and provide better habitat for wildlife. Avoid invasive species.
 * **Soil Remediation:** Vacant land may be contaminated. Implement soil remediation techniques to improve soil health and create a safe environment for plants and animals. (Phytoremediation – using plants to clean soil – is an option).
 * **Rain Gardens & Bioswales:** Design features that capture and filter stormwater runoff.
 * **Permeable Paving:** Use permeable materials for walkways and parking areas to allow water to infiltrate into the ground.
 * **Pollinator Gardens:** Create habitats specifically designed to attract pollinators like bees and butterflies.
* **Policy & Regulations:**
 * **Incentives:** Offer financial incentives to landowners who create or maintain ecological features on vacant land.
 * **Zoning Regulations:** Modify zoning regulations to allow for ecological restoration projects. Consider "conservation subdivisions" that preserve open space.
 * **Green Space Requirements:** Increase green space requirements in new developments.
 * **Land Trusts:** Encourage the use of land trusts to permanently protect vacant land for conservation purposes.
* **Community Engagement:** Crucially, involve the local community in the planning process. This ensures that projects are supported and reflect local needs. Community gardens can be a great way to engage residents and provide food security.
* **Temporary Ecological Zones:** Recognize that some land may be temporarily vacant. Allow for "pop-up" ecological projects (like wildflower meadows) that can provide benefits in the short term.
* **Adaptive Management:** Monitor the effectiveness of ecological restoration projects and adjust management practices as needed.

**III. Tools & Resources**

* **EPA’s Green Infrastructure Program:** [https://www.epa.gov/greeninfrastructure](https://www.epa.gov/greeninfrastructure)
* **i-Tree Eco:** [https://www.itreetools.org/](https://www.itreetools.org/)
* **Local Conservation Organizations:** Partner with local land trusts and environmental groups.
* **GIS Software:** (ArcGIS, QGIS) – essential for mapping and analysis.


**To help me refine this answer for *your* specific needs, could you tell me:**

* **What is the specific context you are interested in?** (e.g., a particular city, a specific type of vacant land - brownfields, abandoned lots, etc.)
* **What is your primary goal?** (e.g., biodiversity conservation, stormwater management, carbon sequestration, community engagement?)
* **Are you looking for information for a research project, a planning initiative, or something else?**

I hope this detailed overview is helpful! Let me know if you'd like me to elaborate on any specific aspect.

### Model: GPT-4o

To quantify the ecological value of vacant urban land, we can use a range of metrics and methodologies that assess its impact on biodiversity, rainwater management, and carbon sequestration. Here’s how each of these aspects can be evaluated:

### 1. **Biodiversity Conservation**
 - **Species Inventory and Habitat Quality**: The number of species present (plant and animal) and the overall health of their habitats are key indicators of biodiversity. Ecologists may use species richness, evenness, and the presence of rare or threatened species to quantify biodiversity. Additionally, assessing habitat quality, such as soil health, plant diversity, and the presence of native species, provides insight into the ecological value of the land.
 - **Habitat Connectivity**: The land’s role in connecting existing natural habitats or green corridors can be measured. Vacant land that serves as a bridge or extension for wildlife corridors enhances ecological connectivity, which is vital for species movement and survival.

### 2. **Rainwater Management**
 - **Stormwater Runoff Reduction**: Vacant urban land can be assessed for its permeability and potential to absorb rainwater. The amount of runoff that would be generated in a typical rainfall event can be quantified using hydrological models. Permeable surfaces like soil, grass, or vegetation help manage rainwater by promoting infiltration and reducing surface runoff, which helps in mitigating flood risks and improving water quality.
 - **Vegetative Cover and Green Infrastructure**: The extent of vegetative cover and the use of green infrastructure (e.g., bioswales, rain gardens, or green roofs) can be measured to quantify the land's ability to manage rainwater. These methods reduce the burden on urban drainage systems and contribute to sustainable water management.

### 3. **Carbon Sequestration**
 - **Soil Carbon Storage**: Soil organic carbon levels can be measured through soil sampling to quantify the amount of carbon stored in the land. Vegetation, particularly trees and plants, also contribute to carbon sequestration through photosynthesis, and this can be estimated based on vegetation type, density, and growth rates.
 - **Carbon Footprint Analysis**: The overall carbon sequestration potential of vacant land can be modeled using carbon accounting frameworks that assess the total amount of carbon absorbed by plants and soils over time.

### Urban Planning Strategies to Maximize Ecological Functions

To maximize the ecological value of vacant urban land, several urban planning strategies can be implemented:

1. **Green Spaces and Urban Forests**: Designating vacant urban land for parks, community gardens, or urban forests can enhance biodiversity, provide recreational spaces, and improve air quality. Planting native species, creating varied habitats, and focusing on ecological restoration are crucial elements in planning these spaces.

2. **Sustainable Drainage Systems (SuDS)**: Implementing green infrastructure such as bioswales, permeable pavements, and rain gardens can significantly improve stormwater management. These features increase water retention, reduce runoff, and enhance water quality by filtering pollutants before they enter water systems.

3. **Urban Agriculture and Community Gardens**: In areas where traditional urban development may not be feasible or desirable, transforming vacant land into urban farms or community gardens can provide local food sources while also improving soil quality and reducing the urban heat island effect.

4. **Carbon Offsetting Projects**: Vacant land can be designated for reforestation or afforestation projects to sequester carbon. Additionally, using vacant land for urban farming with regenerative practices (e.g., agroforestry) can help to capture carbon and improve soil health.

5. **Biodiversity Corridors**: Vacant land can be transformed into biodiversity corridors that connect isolated green spaces, allowing wildlife to move freely across the urban landscape. These corridors can support plant and animal species by creating more connected and diverse habitats.

6. **Ecosystem-Based Urban Zoning**: Implement zoning policies that incentivize the preservation or restoration of ecological functions in vacant lands. This could include tax incentives, land use policies, or regulations that prioritize ecological functions over intensive development.

By quantifying and enhancing the ecological value of vacant urban land through these strategies, cities can promote biodiversity conservation, improve rainwater management, and contribute to carbon sequestration, all while advancing sustainable urban development goals.

### Model: RAG+Qwen2.5-72b

### Quantifying the Ecological Value of Vacant Urban Land

Vacant urban land (VUL) can play a significant role in enhancing the ecological value of urban environments. To fully realize this potential, it is necessary to quantify the ecological benefits that VUL can provide, particularly in terms of biodiversity conservation, rainwater management, and carbon sequestration. Here's how these ecological values can be measured:

#### Biodiversity Conservation

1. **Species Richness and Diversity:** Measure the number and variety of species present in the VUL. This can be done through field surveys and inventories, counting the number of plant, animal, and insect species. The Shannon-Wiener Index or Simpson’s Diversity Index can be used to calculate biodiversity levels.
2. **Habitat Quality and Functionality:** Assess the quality and functionality of habitats provided by VUL. Indicators such as vegetation cover, connectivity to other green spaces, and the presence of microhabitats can be evaluated. Remote sensing and GIS technologies can be used to map and analyze these features.
3. **Ecosystem Services:** Quantify the ecosystem services provided by VUL, such as pollination, pest control, and genetic resources. Economic valuation techniques, such as contingent valuation or avoided cost methods, can be used to assign monetary values to these services.

#### Rainwater Management

1. **Runoff Reduction:** Measure the reduction in surface runoff achieved by implementing green infrastructure on VUL. Techniques such as rain gardens, permeable pavements, and bioswales can be used to slow down and absorb rainwater. Hydrological models can be used to simulate the impact of these interventions.
2. **Water Quality Improvement:** Assess the improvement in water quality resulting from the use of VUL for rainwater management. Parameters such as sediment, nutrient, and pollutant load reductions can be measured. Water samples can be collected and analyzed to monitor changes in water quality.
3. **Aquifer Recharge:** Estimate the amount of water that is recharged into aquifers through VUL. Groundwater monitoring wells can be installed to measure changes in water levels and quality. Hydrogeological models can be used to simulate the impact of VUL on aquifer recharge.

#### Carbon Sequestration

1. **Carbon Stocks:** Measure the amount of carbon stored in vegetation and soil on VUL. Biomass surveys and soil sampling can be conducted to estimate carbon stocks. Allometric equations and soil carbon models can be used to calculate carbon storage.
2. **Net Ecosystem Exchange (NEE):** Measure the exchange of CO2 between the atmosphere and VUL. Eddy covariance flux towers can be used to measure NEE. Data from flux towers can be used to estimate the net carbon balance of VUL.
3. **Carbon Footprint:** Calculate the carbon footprint of VUL, considering the emissions from land preparation, maintenance, and eventual removal or replacement of vegetation. Life cycle assessment (LCA) methods can be used to estimate the net carbon footprint of VUL.

### Urban Planning Strategies to Maximize Ecological Functions

#### Biodiversity Conservation

1. **Connectivity Planning:** Create ecological corridors between VUL and other green spaces in the city to enhance habitat connectivity and facilitate species movement. This can be done through the strategic placement of green infrastructure and the restoration of degraded habitats.
2. **Native Planting Programs:** Implement native planting programs on VUL, selecting species that are well-adapted to local conditions and provide the greatest ecological value. Encourage pollinator-friendly plants and habitats.
3. **Community Engagement:** Involve local communities in the conservation and stewardship of VUL. This can be done through educational programs, volunteer initiatives, and partnerships with community organizations.

#### Rainwater Management

1. **Green Infrastructure Integration:** Incorporate green infrastructure solutions into urban planning for VUL. This can include the installation of green roofs, permeable pavements, rain gardens, and wetlands.
2. **Rainwater Harvesting Systems:** Install systems for harvesting and storing rainwater on VUL. The harvested water can be used for irrigation, toilet flushing, and other non-potable purposes.
3. **Stormwater Management Plans:** Develop comprehensive stormwater management plans that prioritize the use of VUL for rainwater management. This can help reduce flooding, improve water quality, and recharge groundwater supplies.

#### Carbon Sequestration

1. **Afforestation and Reforestation:** Implement afforestation and reforestation programs on VUL, selecting tree species with high carbon sequestration potential. Consider the long-term carbon storage capacity of different tree species.
2. **Soil Carbon Management:** Practice soil carbon management techniques on VUL, such as minimizing soil disturbance, using organic mulches, and promoting the growth of deep-rooted vegetation that can store more carbon in the soil.
3. **Carbon Offsetting Projects:** Develop carbon offsetting projects on VUL. This can include the sale of carbon credits generated from the land’s carbon sequestration activities to companies or individuals looking to offset their own carbon emissions.

### Conclusion

By quantifying the ecological value of vacant urban land and implementing effective planning strategies, cities can maximize the ecological functions of these areas, contributing to more sustainable and resilient urban environments. Urban planners and policymakers should prioritize the integration of VUL into urban ecological networks, ensuring that these spaces are managed in a way that enhances biodiversity, improves rainwater management, and increases carbon sequestration. This holistic approach can help create healthier, more livable cities for current and future generations.

### Model: RAG+Llama3.1-70b

Quantifying and maximizing the ecological value of vacant urban land through planning is crucial for sustainable urban development. Here's a detailed analysis of the topic:

**Quantifying Ecological Value:**

1. **Biodiversity Conservation:** The ecological value of vacant urban land can be quantified in terms of biodiversity conservation by assessing the presence of native plant and animal species, habitat diversity, and ecosystem services.
2. **Rainwater Management:** The ecological value of vacant urban land can be quantified in terms of rainwater management by assessing the land's ability to absorb and filter rainwater, reducing stormwater runoff and mitigating urban flooding.
3. **Carbon Sequestration:** The ecological value of vacant urban land can be quantified in terms of carbon sequestration by assessing the land's ability to absorb and store carbon dioxide, mitigating climate change.

**Urban Planning Strategies:**

1. **Green Infrastructure:** Urban planning strategies can be implemented to maximize the ecological value of vacant urban land by creating green infrastructure, such as parks, gardens, and green roofs, which provide habitat for native species, absorb rainwater, and sequester carbon.
2. **Rain Garden Design:** Rain garden design can be used to maximize the ecological value of vacant urban land by creating shallow depressions that collect and filter rainwater, reducing stormwater runoff and mitigating urban flooding.
3. **Permeable Pavement:** Permeable pavement can be used to maximize the ecological value of vacant urban land by allowing rainwater to percolate through the pavement, reducing stormwater runoff and mitigating urban flooding.
4. **Urban Forestry:** Urban forestry can be used to maximize the ecological value of vacant urban land by planting trees and other vegetation, which provide habitat for native species, absorb rainwater, and sequester carbon.

**Ecological Function Analysis:**

1. **Ecosystem Services:** Ecological function analysis can be used to quantify the ecological value of vacant urban land by assessing the ecosystem services provided, such as air and water filtration, soil formation, and climate regulation.
2. **Habitat Assessment:** Habitat assessment can be used to quantify the ecological value of vacant urban land by assessing the presence of native plant and animal species, habitat diversity, and ecosystem services.
3. **Carbon Footprint Analysis:** Carbon footprint analysis can be used to quantify the ecological value of vacant urban land by assessing the land's ability to absorb and store carbon dioxide, mitigating climate change.

**Maximizing Ecological Functions:**

1. **Ecological Restoration:** Ecological restoration can be used to maximize the ecological functions of vacant urban land by restoring degraded habitats, reintroducing native species, and improving ecosystem services.
2. **Sustainable Land Use Planning:** Sustainable land use planning can be used to maximize the ecological functions of vacant urban land by prioritizing ecological conservation, reducing urban sprawl, and promoting compact and connected urban design.
3. **Community Engagement:** Community engagement can be used to maximize the ecological functions of vacant urban land by involving local communities in planning and decision-making processes, promoting ecological awareness and education, and encouraging community-led ecological restoration projects.

**Conclusion:**

Quantifying and maximizing the ecological value of vacant urban land through planning is crucial for sustainable urban development. By implementing urban planning strategies that prioritize ecological conservation, reducing urban sprawl, and promoting compact and connected urban design, cities can maximize the ecological functions of vacant urban land, supporting biodiversity conservation, rainwater management, and carbon sequestration.

### Model: RAG+Deepseek-R1-70b

To quantify and maximize the ecological value of vacant urban land through planning, especially in terms of biodiversity conservation, rainwater management, and carbon sequestration, the following structured approach can be taken:

### 1. Quantifying Ecological Value

**a. Biodiversity Conservation:**
- **Species Diversity:** Conduct field surveys to identify the variety of plant and animal species present on the vacant land. Use metrics such as species richness and diversity indices.
- **Habitat Quality:** Assess the quality of habitats, including vegetation cover, soil health, and the presence of ecosystems like wetlands or grasslands.
- **Ecosystem Services:** Evaluate pollination services, pest control, and other ecological services provided by the land.

**b. Rainwater Management:**
- **Water Absorption Rates:** Measure the land's ability to absorb and filter rainwater using techniques like infiltration tests.
- **Stormwater Runoff Reduction:** Calculate the reduction in stormwater runoff through the use of permeable surfaces and green infrastructure.
- **Water Quality Improvement:** Monitor improvements in water quality through the filtration of pollutants by vegetation and soil.

**c. Carbon Sequestration:**
- **Soil Carbon Content:** Measure the carbon stored in soils through sampling and analysis.
- **Vegetation Carbon Storage:** Assess the carbon stored in trees and other vegetation using allometric equations or remote sensing.
- **Net Ecosystem Exchange:** Use techniques like eddy covariance to measure the net exchange of carbon dioxide between the land and atmosphere.

### 2. Maximizing Ecological Value Through Urban Planning

**a. Biodiversity Conservation:**
- **Green Corridors and Networks:** Plan green corridors to connect fragmented habitats, enhancing biodiversity and facilitating species migration.
- **Native Plantings:** Promote the use of native plant species in landscaping to support local wildlife and maintain ecosystem integrity.
- **Community Engagement:** Involve local communities in biodiversity conservation efforts through citizen science projects and educational programs.

**b. Rainwater Management:**
- **Green Infrastructure:** Incorporate green roofs, rain gardens, and permeable pavements into urban designs to manage stormwater effectively.
- **Watershed Planning:** Develop watershed management plans that integrate vacant land into larger stormwater management systems.
- **Smart Drainage Systems:** Implement smart technologies like sensors and real-time monitoring to optimize rainwater management.

**c. Carbon Sequestration:**
- **Urban Forestry Initiatives:** Expand tree planting programs to increase carbon sequestration. Select tree species that are effective at storing carbon and are suitable for urban environments.
- **Soil Management Practices:** Promote soil conservation practices like reduced tillage and organic amendments to enhance soil carbon storage.
- **Blue Carbon Initiatives:** If applicable, restore or create wetlands in vacant urban areas to capture and store carbon.

### 3. Implementation and Monitoring

**a. Policy and Regulation:**
- **Zoning Laws:** Adjust zoning laws to encourage ecological uses of vacant land, such as green spaces or wetlands.
- **Incentives:** Offer incentives like tax breaks or grants to property owners and developers who repurpose vacant land for ecological purposes.

**b. Technology and Innovation:**
- **GIS Mapping:** Use Geographic Information Systems (GIS) to identify and prioritize vacant land with high ecological potential.
- **Remote Sensing:** Employ satellite imagery and remote sensing technologies to monitor ecological changes and assess the effectiveness of interventions.

**c. Community Participation:**
- **Public-Private Partnerships:** Collaborate with private entities, NGOs, and community groups to leverage resources and expertise for ecological projects.
- **Educational Programs:** Develop educational programs to raise awareness about the ecological value of vacant land and involve residents in its management.

### 4. Case Studies and Best Practices

**a. Case Studies:**
- **Eco-City Projects:** Study successful eco-city projects where vacant land has been repurposed for ecological benefits, such as the High Line in New York City or the Cheonggyecheon Stream in Seoul.
- **Urban Renewal Initiatives:** Examine urban renewal projects that have incorporated green infrastructure and biodiversity conservation.

**b. Best Practices:**
- **Integrated Urban Planning:** Adopt an integrated approach to urban planning that considers ecological, social, and economic benefits simultaneously.
- **Adaptive Management:** Implement adaptive management strategies that allow for flexibility and continuous improvement based on monitoring and feedback.

### 5. Challenges and Considerations

**a. Funding and Resources:**
- **Budget Allocation:** Ensure adequate funding is allocated for ecological projects on vacant land, potentially through public-private partnerships or grants.
- **Resource Availability:** Assess the availability of resources like seeds, plants, and technical expertise needed for ecological restoration.

**b. Stakeholder Coordination:**
- **Interagency Collaboration:** Foster collaboration among different government agencies, NGOs, and community groups to align goals and efforts.
- **Conflict Resolution:** Address potential conflicts between different stakeholders regarding the use and management of vacant land.

**c. Long-Term Maintenance:**
- **Maintenance Plans:** Develop long-term maintenance plans to ensure the sustainability of ecological projects, including funding for upkeep and management.
- **Community Involvement:** Encourage ongoing community involvement to maintain stewardship of the land and its ecological functions.

### 6. Conclusion

Quantifying and maximizing the ecological value of vacant urban land requires a comprehensive and multidisciplinary approach. By systematically assessing biodiversity conservation, rainwater management, and carbon sequestration, and implementing tailored urban planning strategies, cities can unlock the full ecological potential of their vacant land. Integrating advanced technologies, fostering community engagement, and adopting best practices from successful projects will ensure sustainable and resilient urban environments. Addressing challenges like funding, coordination, and maintenance is crucial for the long-term success of these efforts.

### Model: RAG+Gemma3-27b

Quantifying and maximizing the ecological value of vacant urban land is crucial for building sustainable and resilient cities. Here's a detailed framework encompassing assessment, planning strategies, and long-term management:

**1. Quantifying Ecological Value – Multi-Metric Assessment:**

* **Biodiversity Conservation:**
 * **Species Richness & Abundance:** Conduct ecological surveys to identify and quantify plant and animal species. Utilize indices like the Shannon Diversity Index.
 * **Habitat Quality Assessment:** Evaluate habitat structure, connectivity, and the presence of key ecological features (e.g., nesting sites, food sources).
 * **Index of Biotic Integrity (IBI):** Utilize IBIs to assess the overall health of the ecosystem.
* **Rainwater Management:**
 * **Infiltration Rate:** Measure the rate at which rainwater infiltrates the soil.
 * **Runoff Coefficient:** Calculate the percentage of rainfall that becomes runoff.
 * **Water Storage Capacity:** Estimate the volume of water that can be stored in the soil and vegetation.
 * **Stormwater Retention/Detention Capacity:** Quantify the ability of the land to reduce peak stormwater flows.
* **Carbon Sequestration:**
 * **Aboveground Biomass:** Estimate the carbon stored in trees and other vegetation using allometric equations.
 * **Belowground Biomass:** Estimate the carbon stored in roots and soil organic matter.
 * **Soil Carbon Content:** Measure the organic carbon content of the soil.
 * **Net Ecosystem Exchange (NEE):** Use eddy covariance towers or modeling to estimate the net exchange of carbon dioxide between the land and the atmosphere.
* **Additional Metrics:** Pollinator habitat quality, air quality improvement (reduction of particulate matter), microclimate regulation.

**2. Tools for Quantification:**

* **Remote Sensing:** Utilize satellite imagery (e.g., LiDAR, multispectral) to map vegetation cover, land use, and environmental conditions.
* **GIS (Geographic Information Systems):** Integrate spatial data layers to analyze ecological patterns and identify priority areas for conservation.
* **Field Surveys:** Conduct on-site ecological assessments to collect ground-truth data and validate remote sensing results.
* **Ecological Modeling:** Use models to predict the ecological impacts of different land management scenarios.

**3. Urban Planning Strategies to Maximize Ecological Functions:**

* **Green Infrastructure Networks:** Create interconnected networks of green spaces, including vacant land, parks, green roofs, and green corridors.
* **Habitat Restoration:** Restore degraded habitats by planting native vegetation, removing invasive species, and improving soil health.
* **Rain Gardens & Bioswales:** Implement rain gardens and bioswales to capture and filter stormwater runoff.
* **Permeable Pavements:** Utilize permeable pavements to allow rainwater to infiltrate the soil.
* **Urban Forestry:** Plant trees to provide shade, reduce heat island effects, and sequester carbon.
* **Brownfield Remediation:** Remediate contaminated sites to create safe and ecologically valuable green spaces.
* **Community Gardens & Urban Farms:** Encourage community gardens and urban farms to promote local food production and ecological awareness.
* **Ecological Zoning:** Incorporate ecological considerations into zoning regulations to protect and enhance natural areas.

**4. Community Engagement & Stewardship:**

* **Participatory Planning:** Involve local residents in the planning process to ensure that ecological restoration projects meet community needs.
* **Volunteer Programs:** Organize volunteer events to engage community members in habitat restoration and maintenance activities.
* **Educational Programs:** Provide educational programs to raise awareness about the ecological benefits of vacant land.
* **Community Land Trusts:** Utilize community land trusts to ensure long-term stewardship of ecologically valuable vacant land.

**5. Long-Term Monitoring & Adaptive Management:**

* **Establish Baseline Data:** Collect baseline data on ecological indicators before implementing restoration projects.
* **Regular Monitoring:** Conduct regular monitoring to track changes in ecological conditions over time.
* **Adaptive Management:** Adjust management strategies based on monitoring results and new scientific information.
* **Performance Indicators:** Develop performance indicators to assess the effectiveness of ecological restoration projects.

**Conclusion:**

Maximizing the ecological value of vacant urban land requires a holistic and integrated approach that combines rigorous ecological assessment, strategic urban planning, community engagement, and long-term monitoring. By embracing these strategies, cities can transform underutilized spaces into valuable ecological assets that contribute to a more sustainable and resilient future.

### Model: RAG+GPT-4o

Quantifying and maximizing the ecological value of vacant urban land involves assessing its potential contributions to biodiversity conservation, rainwater management, and carbon sequestration, and then implementing urban planning strategies to enhance these functions. Here’s a structured approach:

**1. Quantifying Ecological Value:**

- **Biodiversity Conservation:**
 - **Species Inventory:** Conduct field surveys to identify and catalog existing plant and animal species. Use biodiversity indices like the Shannon Diversity Index to quantify species richness and evenness.
 - **Habitat Quality Assessment:** Evaluate the structural diversity of habitats, including the presence of native vegetation and connectivity to other green spaces.
 - **Ecosystem Health Indicators:** Use indicators such as the presence of pollinators or keystone species to assess ecosystem health.

- **Rainwater Management:**
 - **Infiltration Capacity:** Measure the soil’s ability to absorb and filter rainwater using infiltration tests.
 - **Runoff Reduction Potential:** Calculate the potential reduction in stormwater runoff through green infrastructure, such as permeable surfaces and vegetation.
 - **Water Quality Improvement:** Assess the capacity of the land to filter pollutants and improve water quality.

- **Carbon Sequestration:**
 - **Biomass Carbon Storage:** Estimate carbon storage in above-ground and below-ground biomass using allometric equations and remote sensing data.
 - **Soil Carbon Content:** Analyze soil samples to determine organic carbon content and sequestration potential.
 - **Carbon Flux Measurement:** Use eddy covariance techniques to measure net carbon exchange between the land and atmosphere.

**2. Tools and Techniques for Assessment:**

- **Remote Sensing and GIS:** Utilize satellite imagery and GIS tools to map vegetation cover, land use, and environmental conditions.
- **Ecological Modelling:** Apply ecological models to simulate different land management scenarios and their impacts on ecological functions.
- **Citizen Science:** Engage community members in data collection efforts to enhance spatial and temporal coverage of ecological assessments.

**3. Urban Planning Strategies to Maximize Ecological Functions:**

- **Green Infrastructure Development:**
 - **Urban Forests and Green Corridors:** Establish urban forests and green corridors to enhance biodiversity and provide ecosystem services.
 - **Rain Gardens and Bioswales:** Implement rain gardens and bioswales to manage stormwater and improve water quality.
 - **Green Roofs and Walls:** Promote green roofs and vertical gardens to increase vegetation cover and reduce urban heat island effects.

- **Habitat Restoration and Enhancement:**
 - **Native Plantings:** Use native plant species to restore ecological function and support local wildlife.
 - **Wetland Restoration:** Restore or create wetlands to enhance water filtration, carbon sequestration, and biodiversity.

- **Community Engagement and Stewardship:**
 - **Community Gardens and Urban Agriculture:** Encourage community-led initiatives that integrate ecological and social benefits.
 - **Educational Programs:** Develop programs to educate residents about the ecological value of vacant land and involve them in stewardship activities.

**4. Monitoring and Adaptive Management:**

- **Regular Monitoring:** Establish protocols for regular monitoring of ecological indicators to track progress and inform management decisions.
- **Adaptive Management:** Use monitoring data to adapt strategies and practices in response to changing conditions and new knowledge.

**5. Policy and Incentives:**

- **Incentive Programs:** Provide incentives for property owners and developers to incorporate ecological enhancements into vacant land projects.
- **Regulatory Frameworks:** Develop policies that prioritize ecological functions in land use planning and zoning regulations.

By quantifying ecological value and implementing targeted urban planning strategies, cities can transform vacant urban land into valuable ecological assets that contribute to sustainable urban development and enhance the quality of life for residents.

## TOPIC5: Impact of Urban Population Decline on the Spatial Patterns and Scale of Vacant Land.

## -How does annual or cumulative urban population loss affect the expansion of vacant land (e.g., as a percentage of total area) and its spatial distribution patterns—from scattered patches to contiguous wastelands?

## -Are there systematic intervention thresholds during the spatial spread of vacant land, and do these thresholds vary with city size?

### Model: Qwen2.5-7b

The impact of urban population decline on the spatial patterns and scale of vacant land is a complex issue that involves multiple factors such as economic conditions, policy interventions, and social dynamics. Here’s an analysis based on existing research and theoretical frameworks:

### 1. Impact of Annual or Cumulative Urban Population Loss

- Annual Population Decline: A consistent annual decline in urban population can lead to the gradual expansion of vacant land. This is because fewer people mean less demand for housing, commercial spaces, and infrastructure. Over time, this can result in a higher percentage of total area becoming vacant.

- Cumulative Population Decline: Cumulative effects are more pronounced over longer periods. A significant cumulative decline can lead to larger areas of vacant land as buildings become abandoned or underutilized. This process is often seen in post-industrial cities where economic restructuring has led to job losses and population outflows.

### 2. Spatial Distribution Patterns

- Scattered Patches: Initially, the expansion of vacant land may be scattered due to various factors such as individual property abandonment, small-scale business closures, or targeted urban renewal projects that leave behind empty lots. These patches can be found in residential areas, commercial zones, and industrial parks.

- Contiguous Wastelands: As population decline continues, contiguous wastelands are more likely to form. This is particularly true in areas with high vacancy rates where multiple properties have been abandoned or underutilized over time. Contiguous wastelands can pose challenges for urban planning as they may require significant investment and effort to be repurposed.

### 3. Systematic Intervention Thresholds

- Thresholds: There are indeed systematic intervention thresholds during the spatial spread of vacant land, but these vary based on city size, economic conditions, and local policies. For smaller cities, a threshold might be lower due to fewer resources for urban renewal projects. In larger cities, higher vacancy rates may trigger more comprehensive interventions.

- Examples:
 - Small Cities: A small city with a population decline of 10% might see significant vacant land formation in key areas like downtown or industrial zones.
 - Large Cities: In large cities, the threshold for intervention could be much higher. For instance, a 25% population decline might trigger more extensive urban renewal efforts.

### 4. Factors Influencing Vacant Land Patterns

- Economic Conditions: Economic downturns can exacerbate population loss and increase vacant land formation.
- Policy Interventions: Local government policies play a crucial role in managing vacant land. Incentives for property owners to sell or develop their properties, zoning changes, and public-private partnerships can influence the rate of vacancy.
- Social Dynamics: Community support structures, social services, and community engagement programs can mitigate the negative impacts of population decline on urban fabric.

### 5. Conclusion

The impact of urban population decline on vacant land is multifaceted and depends on a variety of factors. While annual or cumulative population loss generally leads to an increase in vacant land, the spatial distribution patterns (from scattered patches to contiguous wastelands) are influenced by local economic conditions, policy interventions, and social dynamics. Systematic intervention thresholds do exist but vary significantly based on city size and other contextual factors.

Understanding these dynamics is crucial for urban planners and policymakers aiming to manage the challenges posed by declining populations effectively.

### Model: Llama3.1-8b

The impact of urban population decline on the spatial patterns and scale of vacant land is a complex phenomenon that can have significant effects on the physical and social fabric of cities. Here's a comprehensive analysis of this topic:

Impact of Urban Population Decline on Vacant Land

1. Expansion of Vacant Land: As the urban population declines, the demand for housing, commercial spaces, and other infrastructure decreases. This reduction in demand can lead to an increase in vacant land as properties are abandoned or left unoccupied.
2. Spatial Distribution Patterns: The spatial distribution of vacant land can change significantly over time. Initially, vacant land may be scattered throughout the city, with small patches of empty lots and abandoned buildings. As the population decline continues, these scattered patches can merge to form larger contiguous areas of vacant land.
3. Systematic Intervention Thresholds: There are systematic intervention thresholds during the spatial spread of vacant land. These thresholds can be related to factors such as:
 -The rate of population decline: A faster rate of decline may lead to a more rapid expansion of vacant land.
 -City size: Larger cities may experience a slower expansion of vacant land due to their greater economic and social resilience.
 -Urban planning policies: Cities with effective urban planning policies, such as those that promote infill development or redevelopment, may be able to mitigate the effects of population decline on vacant land.

Factors Influencing the Spatial Spread of Vacant Land

1. City Size: Larger cities tend to have a slower expansion of vacant land due to their greater economic and social resilience.
2. Urban Planning Policies: Cities with effective urban planning policies, such as those that promote infill development or redevelopment, may be able to mitigate the effects of population decline on vacant land.
3. Economic Conditions: Economic downturns can exacerbate the effects of population decline on vacant land by reducing investment in infrastructure and property maintenance.
4. Social Factors: Social factors, such as changes in demographics or migration patterns, can also influence the spatial spread of vacant land.

Intervention Strategies to Mitigate the Effects of Urban Population Decline

1. Infill Development: Encourage infill development by providing incentives for developers to build on underutilized parcels of land.
2. Redevelopment: Implement redevelopment strategies that transform abandoned or vacant properties into vibrant and functional spaces.
3. Urban Renewal: Implement urban renewal initiatives that focus on revitalizing neighborhoods and improving the overall quality of life for residents.
4. Community Engagement: Engage with local communities to understand their needs and priorities, and involve them in the planning process to ensure that interventions are responsive to their concerns.

By understanding the impact of urban population decline on vacant land and implementing effective intervention strategies, cities can mitigate the negative effects of this phenomenon and create more sustainable and resilient urban environments.

### Model: Deepseek-R1-7b

The impact of urban population decline on the spatial patterns and scale of vacant land is a multifaceted issue influenced by various factors, including economic conditions, migration trends, policy interventions, and regional development. Here's an organized summary of the key points:

1. Urban Population Decline and Vacant Land Increase:
- As cities experience population loss, more land becomes vacant due to reduced demand for housing and commercial space.
- The percentage of vacant land tends to increase cumulatively over time as people leave urban areas.

2. Spatial Patterns of Vacant Land:
- Initially, vacant land may appear scattered, consisting of small patches in various locations.
- Over time, these patches can merge into contiguous wastelands, forming a single large area.
- The rate at which this transition occurs (thresholds) depends on city size. Smaller cities may have less drastic population loss and slower expansion rates compared to larger cities.

3. Economic and Policy Influences:
- Economic factors such as industry decline can accelerate vacant land growth, while policy interventions aimed at attracting new residents can mitigate this trend.
- The emergence of new industries or businesses in response to population decline may slow the spread of vacant land.

4. Regional Clustering and Distribution:
- Vacant land may cluster initially in specific areas like downtowns before spreading outward into outer suburbs as populations decrease.
- Urban planning policies play a crucial role in determining whether vacant land spreads or is reduced through relocation incentives.

5. Economic Trends and Recession Impact:
- Economic downturns can lead to population decline, contributing to increased vacant land. This affects local economies by reducing infrastructure investment and service provision.

6. Migration Waves and Regional Development:
- Population decline may occur gradually due to migration waves or sudden events like natural disasters, leading to incremental changes in vacant land distribution.
- Cities with planned urban areas may see more predictable vacant land expansion compared to those with less regulation.

7. Case Studies and Research:
- Investigating real-world data from cities experiencing population decline could provide insights into the thresholds of vacant land spread and variations by city size.

In conclusion, urban population decline significantly influences the growth and spatial distribution of vacant land, with various factors such as economic conditions, migration patterns, and policy interventions shaping this process. Understanding these dynamics is crucial for effective urban planning and management to mitigate negative impacts on public services and quality of life.

### Model: Gemma3-4b

Okay, Topic 5 – the impact of urban population decline on vacant land – is a critical and complex area. Let’s delve into the spatial dynamics and potential intervention thresholds.

**1. The Spatial Feedback Loop: Population Decline & Vacant Land Expansion**

The core observation is a reinforcing feedback loop: population decline *drives* vacant land expansion, and vacant land expansion, in turn, further exacerbates population decline (creating a negative feedback loop). Here’s how this plays out:

* **Initial Scattered Patches:** Initially, population loss often manifests as a scattering of vacant residential units – particularly in older, less desirable neighborhoods. These appear as isolated patches of vacant land.
* **Contiguous Wastelands:** As population decline continues, these patches coalesce. Abandoned commercial properties, industrial sites, and residential areas join the network of vacant land. This leads to the formation of larger, contiguous wastelands.
* **Edge Effects:** The boundaries of these wastelands become more prominent, creating distinct "urban fringes" characterized by a high density of vacant land.

**2. Scaling of Vacant Land Expansion – Thresholds & City Size**

The rate and pattern of expansion aren’t linear. Several factors suggest the existence of intervention thresholds, and these thresholds likely vary with city size:

* **Threshold 1: Early Stage (5-10% Population Loss):** At this stage, the expansion is largely localized and sporadic. Intervention is most effective – focusing on targeted revitalization programs, brownfield remediation, and incentives for redevelopment.
* **Threshold 2: Moderate Decline (10-20% Population Loss):** This is where the spatial pattern begins to shift noticeably. The isolated patches become more interconnected, and contiguous wastelands start to form. Strategic interventions become crucial – prioritizing the stabilization of key areas and the implementation of broader urban planning strategies.
* **Threshold 3: Significant Decline (20%+ Population Loss):** At this point, the spatial dynamics become highly complex. The wastelands tend to expand outwards, consuming surrounding areas. The risk of sprawl increases dramatically. Intervention becomes much more challenging – requiring large-scale, systemic changes to urban form and policy.

**3. Systematic Intervention Thresholds – Considerations:**

* **Density of Existing Infrastructure:** Higher density areas tend to absorb decline more effectively through adaptive reuse and infill development. Lower-density areas are more vulnerable to sprawl.
* **Land Use Mix:** Cities with diverse land uses (residential, commercial, industrial) are better able to accommodate population decline than cities dominated by a single land use.
* **Governance & Policy:** Strong urban planning regulations, zoning ordinances, and property tax policies can help to control sprawl and incentivize redevelopment.
* **Social Capital:** Communities with strong social networks and civic engagement are more likely to support revitalization efforts.

**4. City Size as a Moderator:**

* **Smaller Cities:** The spatial spread of vacant land is often faster and more uncontrolled in smaller cities due to limited resources and weaker governance.
* **Larger Cities:** Larger cities have the capacity for more sophisticated planning and intervention strategies. However, the sheer scale of the problem can make it difficult to achieve meaningful change.

**5. Connecting to Existing Research (Context 1 & 3):**

* **Context 1’s** emphasis on “residential vacancy” is key. The “neighborhood vacancy prevalence” index offers a valuable metric for tracking the spatial spread of vacant land.
* **Context 3** highlights the distinction between “vacant land” and “structural abandonment.” Structural abandonment (the physical decay of buildings) can act as a catalyst for further vacancy expansion.

**Further Research Questions:**

* How do different types of population decline (e.g., residential vs. commercial) affect the spatial patterns of vacant land?
* What are the most effective intervention strategies for different types of vacant land (e.g., brownfields, residential lots)?
* How can we use GIS and remote sensing to monitor the spatial spread of vacant land in real-time?

To refine this response and explore specific aspects further, could you tell me:

* Are you particularly interested in a specific type of urban setting (e.g., post-industrial city, suburban sprawl, coastal city)?
* Are there any specific intervention strategies you’d like to explore in more detail (e.g., urban land trusts, community development corporations)?

### Model: GPT-4o-mini

The decline of urban populations can significantly impact the spatial patterns and scale of vacant land, leading to various outcomes based on how these dynamics interact with city characteristics and demographics. The relationship between population decline and vacant land involves several interrelated factors that can be explored in terms of percentage of total area, spatial distribution patterns, and potential thresholds for intervention.

### Impact of Urban Population Decline on Vacant Land

1. Increase in Vacant Land Area:
- As urban populations decline, previously occupied lands may become abandoned, thereby increasing the amount of vacant land in a city. This increase can be quantified as a percentage of the total urban area, with larger declines in population leading to more substantial increases in vacant land.

2. Spatial Distribution Patterns:
- Scattered Patches vs. Contiguous Wastelands: Initially, as small numbers of residents leave, vacant land may emerge as isolated patches interspersed throughout a city. However, with greater population loss, these patches can coalesce into larger contiguous areas of vacant land. Thus, the pattern of vacant land can shift from a scattered distribution to more extensive areas of contiguous wasteland, especially in declining neighborhoods or regions.
- Concentration in Specific Areas: Population loss often concentrates in particular neighborhoods or districts, leading to targeted increases in vacant land in those areas, which can result in more pronounced spatial inequities across the urban landscape.

3. Urban Geography and City Size Impact:
- Smaller Cities: In smaller cities, a population decline may rapidly lead to noticeable amounts of vacant land as there is less overall area to absorb the loss, leading to a faster transition from scattered patches to contiguous empty spaces.
- Larger Cities: Larger cities may exhibit a more complex relationship, as loss in one area may be counterbalanced by growth or stabilization in another, resulting in a more gradual transition. However, certain neighborhoods can reach tipping points where significant declines lead to substantial concentrations of vacant land.

### Systematic Intervention Thresholds

1. Population Thresholds:
- There may be systematic thresholds for interventions, wherein once the population decline reaches a certain percentage (e.g., 10%, 20%), municipalities begin to notice a significant increase in vacant land. These thresholds differ based on socio-economic conditions, governance structures, and local policies.
- Smaller cities may experience more immediate effects and require quicker intervention efforts compared to larger cities, where urban cores might maintain vibrancy despite outlying declines.

2. Policy Intervention Levels:
- Cities may also experience thresholds concerning urban policy interventions, wherein certain levels of vacancy may trigger policy responses such as zoning changes, brownfield redevelopment, or community revitalization strategies. Such interventions may be more necessary in areas where vacated land forms contiguous bands, impacting more significant swaths of the urban environment.

3. Scale of Decline and Size of Vacant Land:
- The scale of population decline can influence the nature of interventions. For instance, a 30% population loss in a densely populated area may warrant immediate and aggressive urban planning reforms, while a similar decline spread over a larger, less densely populated area might lead to more gradual planning processes.

### Conclusion

The impact of urban population decline on vacant land is multifaceted and varies substantially across different city sizes and contexts. Scattered patches of vacant land can evolve into larger contiguous areas as population loss progresses. Systematic intervention thresholds exist, influenced by both the scale of decline and urban characteristics, necessitating tailored responses to manage urban environments effectively. Understanding these dynamics is essential for informing sustainable urban policy and revitalization strategies aimed at mitigating the adverse effects of urban population decline.

### Model: Qwen-2.5-72b

### Impact of Urban Population Decline on the Spatial Patterns and Scale of Vacant Land

#### Introduction
Urban population decline, often associated with deindustrialization, economic shifts, and demographic changes, can lead to significant transformations in the urban landscape. One of the most notable impacts is the expansion of vacant land. This phenomenon not only affects the physical environment but also has socio-economic and environmental implications. This discussion explores how annual or cumulative urban population loss influences the expansion of vacant land, its spatial distribution patterns, and the intervention thresholds that may vary with city size.

#### 1. Impact of Urban Population Loss on Vacant Land Expansion

**1.1 Annual vs. Cumulative Population Loss**
- **Annual Population Loss:** Short-term population decline can lead to a gradual increase in vacant land, often starting with small, scattered patches. These patches may initially appear in areas with higher economic distress or older housing stock.
- **Cumulative Population Loss:** Long-term, sustained population decline exacerbates the problem, leading to a more significant and widespread expansion of vacant land. Over time, these patches can coalesce into larger, contiguous areas.

**1.2 Percentage of Total Area Affected**
- **Initial Stages:** In the early stages of population decline, vacant land might constitute a small percentage of the total urban area, typically less than 5-10%.
- **Advanced Stages:** As population loss continues, the percentage of vacant land can increase significantly, sometimes reaching 20-30% or more of the total urban area.

#### 2. Spatial Distribution Patterns of Vacant Land

**2.1 Scattered Patches**
- **Characteristics:** In the early stages of population decline, vacant land often appears as scattered patches. These patches are typically small and isolated, often located in areas with declining property values or high levels of economic distress.
- **Causes:** Scattered patches can result from individual property abandonment, economic disinvestment, or demographic shifts within specific neighborhoods.

**2.2 Contiguous Wastelands**
- **Characteristics:** As population decline progresses, scattered patches can merge to form larger, contiguous areas of vacant land. These areas, often referred to as "wastelands," can cover significant portions of the urban landscape.
- **Causes:** Contiguous wastelands are typically the result of prolonged economic decline, large-scale industrial closures, and the outmigration of residents. They can also be exacerbated by a lack of effective urban planning and management.

#### 3. Intervention Thresholds and City Size

**3.1 Systematic Intervention Thresholds**
- **Early Intervention:** Early intervention is crucial to prevent the spread of vacant land. Thresholds for intervention might include:
 - **Vacant Land Percentage:** Intervening when vacant land reaches 5-10% of the total urban area.
 - **Economic Indicators:** Monitoring economic indicators such as property values, unemployment rates, and business closures.
 - **Social Indicators:** Tracking social indicators like crime rates and community engagement.

- **Advanced Intervention:** For more advanced stages of population decline, intervention thresholds might include:
 - **Vacant Land Percentage:** Intervening when vacant land reaches 15-20% of the total urban area.
 - **Spatial Contiguity:** Addressing contiguous areas of vacant land to prevent the formation of large wastelands.
 - **Community Resilience:** Focusing on building community resilience through social programs and economic development initiatives.

**3.2 Variability with City Size**
- **Small Cities:**
 - **Impact:** Small cities may experience more rapid and severe impacts of population decline due to their limited economic diversity and smaller tax bases.
 - **Intervention:** Early intervention is critical in small cities to prevent the rapid spread of vacant land. Community-led initiatives and local partnerships can be particularly effective.
- **Large Cities:**
 - **Impact:** Large cities may have more resources to address population decline and vacant land, but the scale of the problem can be more extensive and complex.
 - **Intervention:** Large cities may require more comprehensive and coordinated efforts, including large-scale urban renewal projects, economic diversification strategies, and regional collaboration.

#### Conclusion
Urban population decline has a profound impact on the expansion and spatial distribution of vacant land. Understanding the dynamics of this process, including the transition from scattered patches to contiguous wastelands, is crucial for effective urban planning and management. Systematic intervention thresholds, tailored to the specific context and size of the city, can help mitigate the negative impacts of population decline and promote sustainable urban development.

### Model: Llama-3.1-70b

The impact of urban population decline on the spatial patterns and scale of vacant land is a complex issue that affects many cities worldwide. Research has shown that population decline can lead to an increase in vacant land, which can have significant implications for urban planning, economic development, and social cohesion.

**Impact on Vacant Land Expansion**

Studies have consistently shown that population decline is associated with an increase in vacant land. For example, a study on urban decline in the United States found that for every 10% decrease in population, the percentage of vacant land increased by 2-5% (Schilling and Logan, 2008). Similarly, a study on European cities found that population decline led to an increase in vacant land, particularly in cities with high levels of shrinkage (Haase et al., 2010).

**Spatial Distribution Patterns**

The spatial distribution of vacant land in declining cities can take various forms, ranging from scattered patches to contiguous wastelands. Research has identified several patterns:

1. **Scattered patches**: Vacant land can be scattered throughout the city, often in the form of abandoned lots, buildings, or streets.
2. **Clustered vacant land**: Vacant land can cluster in specific neighborhoods or areas, often due to disinvestment, poverty, or lack of maintenance.
3. **Contiguous wastelands**: In extreme cases, vacant land can form large, contiguous areas of abandonment, often with little signs of life or activity.

**Systematic Intervention Thresholds**

Research suggests that there are systematic intervention thresholds during the spatial spread of vacant land, which can vary with city size. For example:

1. **Small cities**: In small cities, even modest population decline can lead to significant increases in vacant land, as the city's infrastructure and services may be scaled back.
2. **Medium cities**: In medium cities, population decline can lead to the formation of scattered patches of vacant land, which can be managed through targeted interventions.
3. **Large cities**: In large cities, population decline can lead to the formation of contiguous wastelands, which may require more comprehensive and coordinated interventions.

**Thresholds for Intervention**

While the exact thresholds for intervention vary depending on the city, some research suggests the following:

1. **10-20% population decline**: At this level, cities may experience an increase in scattered patches of vacant land, which can be managed through targeted interventions.
2. **20-30% population decline**: At this level, cities may experience the formation of clustered vacant land, which may require more comprehensive interventions.
3. **30-50% population decline**: At this level, cities may experience the formation of contiguous wastelands, which may require large-scale, coordinated interventions.

In conclusion, the impact of urban population decline on the spatial patterns and scale of vacant land is complex and can vary depending on city size and other factors. Understanding these dynamics can help urban planners and policymakers develop effective interventions to manage vacant land and promote urban renewal.

### Model: Deepseek-R1-70b

The phenomenon of urban population decline and its impact on vacant land is a critical issue in urban planning and geography. The relationship between population loss and the expansion or transformation of vacant land is complex and influenced by various factors, including the rate and extent of population decline, urban policies, economic conditions, and the historical development of the city. Below is an analysis of how annual or cumulative urban population loss might affect the expansion and spatial distribution of vacant land, as well as the potential intervention thresholds:

---

### 1. **Impact of Population Decline on Vacant Land Expansion**
Urban population decline can lead to an increase in vacant land as buildings, infrastructure, and services become underutilized or abandoned. The rate of population loss (annual or cumulative) can influence the speed and scale of vacant land expansion.

- **Annual Population Loss**:
 - If population decline is gradual, vacant land expansion may also occur incrementally. For example, annual population loss of 1% might lead to a steady increase in vacant land as neighborhoods gradually depopulate.
 - Rapid annual population loss (e.g., due to economic collapse or conflict) could result in a faster expansion of vacant land, potentially overwhelming urban planning systems and leading to larger contiguous areas of vacancy.

- **Cumulative Population Loss**:
 - Over time, cumulative population loss can result in significant changes in land use patterns. For instance, a city losing 20% of its population over two decades may experience a noticeable increase in vacant land as a percentage of total urban area.
 - Cumulative loss can also lead to shifts in the spatial distribution of vacant land, as certain neighborhoods or districts become disproportionately affected.

---

### 2. **Spatial Distribution Patterns of Vacant Land**
The spatial distribution of vacant land is not random and often reflects broader socioeconomic and structural factors. Over time, vacant land distribution patterns may evolve:

- **Scattered Patches**:
 - In the early stages of population decline, vacant land may emerge as scattered patches in isolated locations, such as abandoned houses, shuttered businesses, or parking lots.
 - These scattered vacancies are often concentrated in economically disadvantaged areas, older neighborhoods, or areas with outdated infrastructure.

- **Contiguous Wastelands**:
 - As population decline persists, scattered vacant patches may coalesce into larger contiguous areas of vacant land, forming "wastelands" or "urban voids."
 - This process is often seen in cities with significant disinvestment, such as post-industrial cities in the Midwest or Rust Belt regions of the United States.

---

### 3. **Systematic Intervention Thresholds**
Governments, urban planners, and policymakers often establish thresholds for intervening in the spread of vacant land. These thresholds may vary depending on the size and economic context of the city:

- **Small Cities**:
 - Smaller cities may have lower intervention thresholds due to limited resources and the proportionally larger impact of population decline.
 - For example, a small city losing 5% of its population annually may quickly reach a critical threshold where vacant land becomes a significant concern.

- **Large Cities**:
 - Larger cities may have higher intervention thresholds due to their greater resilience and capacity to absorb population loss without immediate catastrophic effects.
 - However, even in large cities,.once vacant land reaches a certain percentage of total area (e.g., 10-15%), it may trigger systematic interventions, such as land reuse programs or urban renewal initiatives.

---

### 4. **Variability of Thresholds with City Size**
The thresholds at which vacant land becomes a concern and interventions are triggered vary with city size:

- **Small to Medium Cities**:
 - These cities often lack the resources to manage widespread vacancy and may reach intervention thresholds sooner (e.g., when vacant land reaches 5-10% of total area).
 - Interventions may focus on stabilization (e.g., demolishing unsafe structures) rather than large-scale redevelopment.

- **Large Cities**:
 - Larger cities may tolerate higher percentages of vacant land before intervening, as they often have greater economic and planning capacity.
 - Interventions in large cities may focus on strategic redevelopment, such as converting vacant land into green spaces, mixed-use developments, or affordable housing.

---

### 5. **Examples and Considerations**
- **Detroit, USA**: A classic example of a city experiencing significant population decline and contiguous vacant land expansion. After losing over 60% of its population since the 1950s, Detroit has large swaths of vacant land, prompting innovative interventions like urban agriculture and land banks.
- **Eastern European Cities**: Many post-Soviet cities have experienced population decline and vacancy due to economic restructuring and demographic changes. These cities often exhibit scattered vacancy patterns, with abandonment concentrated in peripheral areas.

---

### 6. **Policy and Planning Implications**
- **Monitoring and Data Collection**: Tracking population decline, vacancy rates, and land use changes is critical for identifying thresholds and planning interventions.
- **Proactive versus Reactive Interventions**: Cities that intervene early (e.g., through land banking or targeted redevelopment) may prevent the formation of large contiguous vacant areas.
- **Adaptive Reuse and Flexibility**: Vacant land can present opportunities for repurposing urban space, such as parks, green infrastructure, or innovative housing solutions.

---

### Conclusion
Urban population decline can lead to a gradual or rapid expansion of vacant land, depending on the rate and extent of population loss. The spatial distribution of vacant land evolves from scattered patches to contiguous areas over time, influenced by socioeconomic and structural factors. Intervention thresholds vary with city size, with smaller cities reaching critical levels faster than larger cities. Effective urban planning requires understanding these dynamics and implementing tailored strategies to address vacancy and promote sustainable urban development.

### Model: Gemma-3-27b

Okay, I can definitely help you brainstorm and structure thinking around the topic of **"Impact of Urban Population Decline on the Spatial Patterns and Scale of Vacant Land."** This is a fascinating and increasingly relevant area of urban studies! Here's a breakdown, acting as a helpful assistant, covering key considerations, potential research avenues, and how to approach those thresholds you mentioned. I'll organize it into sections, aiming for a comprehensive overview.

**I. Understanding the Core Relationship: Population Loss & Vacant Land**

* **The Basic Mechanism:** Population loss directly reduces demand for housing, commercial space, and overall land use. This leads to abandonment, foreclosures, and a surplus of built environment. This surplus *becomes* vacant land.
* **Not Just Population *Loss*, but *Where* Loss Occurs:** The *location* of population decline is critical. Areas already struggling with economic hardship, aging infrastructure, or limited amenities are more vulnerable to becoming vacant. Loss concentrated in specific neighborhoods will have a different spatial impact than diffuse, city-wide decline.
* **Time Lag:** There's rarely an immediate 1:1 correlation. It takes time for vacant properties to accumulate, for demolition to occur (or *not* occur), and for the spatial patterns to become apparent. That's why both *annual* and *cumulative* population loss are important metrics.
* **Beyond Population - Economic Drivers:** Don't solely focus on population. Job losses, industry shifts, changing demographics, and fiscal stress all contribute and interact with population decline.


**II. Spatial Patterns of Vacant Land Expansion – From Patches to Wastelands**

Here’s how the expansion might look over time:

* **Stage 1: Scattered Patches (Initial Decline)**
 * Individual vacant lots, abandoned houses interspersed within relatively stable neighborhoods.
 * Often concentrated in older, less desirable areas.
 * Appearance: Disorderly, seemingly random.
 * Scale: Small percentage of total area.
* **Stage 2: Clustering & Consolidation (Moderate Decline)**
 * Vacant land starts to cluster along streets, blocks, or within specific neighborhoods.
 * Adjacent lots may be owned by different entities, creating fragmented ownership.
 * Evidence of disinvestment begins to show (deteriorating infrastructure, increased crime).
 * Scale: Increasing percentage, noticeable at the neighborhood level.
* **Stage 3: Contiguous Blocks & Neighborhood-Scale Vacancy (Significant Decline)**
 * Large areas of contiguous vacant land emerge - 'holes' in the urban fabric.
 * Potential for environmental hazards (illegal dumping, brownfields).
 * Significant decline in property values.
 * Scale: Large percentage, visible city-wide, potentially impacting city finances.
* **Stage 4: Wastelands/Peripheralization (Severe & Prolonged Decline)**
 * Extensive areas of vacancy, bordering on collapse.
 * Formal or informal abandonment of city services.
 * Potential for urban wilding – nature reclaiming the built environment.
 * Scale: Very large percentage, potentially leading to shrinking cities or ‘ghost cities’


**III. Systematic Intervention Thresholds – When Does Action Become Critical?**

This is the core of your question, and it's complex! Here's how to think about it, and factors that might influence the thresholds:

* **Threshold 1: 5-10% Vacancy (Neighborhood Level)** – *Early Warning*. At this point, targeted interventions can be relatively effective. Focus on:
 * **Code enforcement:** Addressing blight and safety hazards.
 * **Land banking:** Acquiring vacant properties strategically for future development.
 * **Community engagement:** Working with residents to develop neighborhood plans.
 * **Small-scale revitalization projects:** Demonstration projects to attract investment.
* **Threshold 2: 15-20% Vacancy (Neighborhood Level)** – *Critical Mass*. Vacancy starts to have a self-reinforcing effect.
 * **More aggressive land acquisition and demolition programs:** Removing blighted properties.
 * **Incentivizing redevelopment:** Tax breaks, grants, streamlined permitting.
 * **Strategic planning & zoning changes:** To encourage mixed-use development and infill.
* **Threshold 3: 30%+ Vacancy (Neighborhood/City Level)** – *Emergency Situation*. The neighborhood is in severe distress. Requires large-scale intervention.
 * **Potential for city-led redevelopment projects.**
 * **Consideration of "managed decline" strategies** (controversial, but sometimes necessary).
 * **Focus on stabilizing remaining communities.**

**Do these thresholds vary with city size? YES, absolutely.**

* **Smaller Cities:** A smaller *absolute* number of vacant properties can have a disproportionately larger impact. A few dozen vacant houses in a town of 10,000 can be devastating. The thresholds are *lower*. Resources are also likely more limited.
* **Mid-Sized Cities:** More capacity for intervention, but also more complex governance structures. Thresholds are similar to above, but the scope of interventions needs to be larger.
* **Large Cities:** Greater resilience and a larger tax base, but also more bureaucratic hurdles. Higher vacancy percentages may be tolerated before intervention is deemed necessary, but the *scale* of intervention needs to be massive. A 30% vacancy rate in one neighborhood of a huge city might be less immediately catastrophic than in a smaller city.


**IV. Data & Methods to Support Your Research**

* **Data Sources:**
 * **Parcel data:** From local governments, providing ownership, land use, and assessed value information.
 * **Building permits:** To track construction and demolition activity.
 * **Population data:** Census data, American Community Survey (ACS).
 * **Foreclosure data:** Tracking property foreclosures.
 * **Satellite imagery/Aerial photography:** For visual assessment of vacancy.
 * **GIS Software:** Essential for spatial analysis.
* **Methods:**
 * **Spatial statistics:** To identify clusters of vacant land.
 * **Regression analysis:** To determine the relationship between population loss and vacancy rates.
 * **Time series analysis:** To track changes in vacancy patterns over time.
 * **Case studies:** In-depth examination of specific cities.


**To help me refine this further for *your* specific needs, could you tell me:**

* **What is the geographical scope of your research?** (Specific cities, region, country?)
* **What are you hoping to *do* with this information?** (Thesis, policy analysis, etc.)
* **Are you interested in any specific types of interventions?** (e.g., green infrastructure, community gardens, brownfield remediation)


I hope this detailed response gives you a strong starting point. I’m here to help you delve deeper into any of these areas! Just let me know what you’d like to explore further.

### Model: GPT-4o

This is a complex and interesting question that involves urban studies, population dynamics, and land use. Here’s a breakdown of how annual or cumulative urban population loss might influence vacant land patterns:

1. **Impact on Expansion of Vacant Land:**
 - **Percentage of Total Area**: As the urban population declines, especially over a prolonged period, vacant land tends to increase as a percentage of total urban area. This is because as people move away, the demand for housing and other infrastructure decreases, leaving previously occupied areas unused. In the early stages, vacant land might represent a small proportion, but over time, it could become a significant portion of the urban fabric.

 - **Cumulative Effect**: Over years, as populations continue to decrease, the overall area of vacant land grows. Cumulative losses might result in the abandonment of entire districts or neighborhoods, particularly in regions with low economic activity or a lack of urban renewal initiatives.

2. **Spatial Distribution Patterns:**
 - **Scattered Patches**: Initially, vacant land might appear as isolated patches within cities, often located in less desirable or economically underperforming areas (e.g., industrial zones, outdated residential areas, or poorly connected regions).

 - **Contiguous Wastelands**: Over time, as the population continues to shrink and urban sprawl or decline accelerates, these scattered patches could merge into larger contiguous areas of wasteland. This phenomenon might occur in cities where urban decay is more prominent, such as in post-industrial regions or in cities experiencing severe economic downturns.

3. **Systematic Intervention Thresholds:**
 - There are likely thresholds beyond which urban planners or local governments may intervene to prevent or manage vacant land expansion. For example:
 - **Critical Thresholds**: If a certain percentage of the population has left, municipalities may implement strategies for revitalization, repurposing vacant land for new uses like green spaces, urban farming, or new developments.
 - **Thresholds for Urban Blight**: Once vacant land becomes a significant portion of the urban area (e.g., 10-20% of the total land area), it may trigger formal intervention by city authorities, either through zoning changes, development incentives, or social programs aimed at revitalizing or mitigating blight.

4. **Variation by City Size:**
 - **Larger Cities**: In larger cities, the effects of population decline on vacant land might be less immediately visible. These cities typically have more robust infrastructure, a higher rate of immigration or resettlement, and greater economic diversification. Therefore, vacant land may remain concentrated in specific areas but may not spread as rapidly across the city. However, when vacant land does expand, it could form large contiguous patches due to the size and complexity of the urban environment.

 - **Smaller Cities**: Smaller cities or towns, especially those dependent on single industries, might see a more rapid and widespread spread of vacant land as population loss is more acute and more evenly distributed across the city. These cities might have fewer resources for redevelopment, and vacant land might quickly become contiguous wastelands, especially if there is no population influx or economic revitalization.

In conclusion, urban population loss does lead to an increase in vacant land, with a shift from scattered patches to contiguous wastelands as the population decline becomes more pronounced. The speed of this transformation and the specific thresholds for intervention vary depending on the city’s size, economic health, and government response strategies.

### Model: RAG+Qwen2.5-72b

### Introduction

Urban population decline can have profound impacts on the spatial patterns and scale of vacant land (VUL) within a city. As the population decreases, the demand for housing and commercial spaces reduces, leading to an increase in vacant properties. This process can trigger a cascade of effects, transforming scattered patches of VUL into larger, more contiguous areas of abandonment. Understanding the relationship between population loss and VUL expansion is crucial for developing effective urban planning and policy interventions. Moreover, identifying systematic intervention thresholds and their variation with city size can enhance the efficacy of these interventions.

### Impact of Urban Population Decline on VUL

#### Expansion of VUL

Population decline can lead to a significant expansion of VUL, as the reduced demand for urban spaces outpaces the rate at which these spaces can be repurposed or reused. This expansion can be measured as a percentage of the total urban area that becomes vacant. For example, in shrinking cities, VUL can comprise anywhere from 10% to over 30% of the total urban area, depending on the severity and duration of population loss.

#### Spatial Distribution Patterns

The spatial distribution of VUL can change from scattered patches to more contiguous wastelands as population decline progresses. Initially, VUL may appear as isolated parcels dispersed throughout the city, reflecting localized disinvestment and abandonment. As population loss continues, these patches can coalesce, forming larger areas of vacancy. This process can be influenced by various factors, such as the initial distribution of VUL, the intensity and duration of population loss, and the city's response to vacancy.

### Systematic Intervention Thresholds

#### Definition and Identification

Systematic intervention thresholds refer to the points at which urban vacancy reaches a critical mass, triggering a shift in the nature and scale of interventions required to address the problem. These thresholds can be identified through the analysis of historical data, case studies, and simulations. For example, a threshold may be reached when VUL exceeds a certain percentage of the total urban area, leading to significant economic and social impacts that necessitate a coordinated and comprehensive response.

#### Variation with City Size

The intervention thresholds for VUL can vary with city size, as larger cities may have greater capacity to absorb a certain level of vacancy before it becomes problematic. Smaller cities, on the other hand, may reach intervention thresholds sooner due to their limited resources and smaller urban fabric. For example, a vacancy rate of 10% may be manageable in a large city but could have severe consequences in a small town. Therefore, intervention strategies must be tailored to the specific characteristics and needs of different-sized cities.

### Research Methodology

To investigate the impact of urban population decline on VUL and identify systematic intervention thresholds, a mixed-methods approach can be adopted. This approach can include:

#### Quantitative Analysis

- **Regression Analysis:** Use regression models to quantify the relationship between population decline and VUL expansion. These models can help identify factors that influence the spatial distribution patterns of VUL.
- **Spatial Analysis:** Employ spatial analysis techniques, such as GIS, to map and analyze the spatial distribution of VUL over time. This can reveal patterns of coalescence and identify areas that may require intervention.

#### Qualitative Analysis

- **Case Studies:** Conduct case studies of cities experiencing population decline to understand the specific factors driving VUL expansion and the effectiveness of different intervention strategies. These case studies can provide insights into the variation of intervention thresholds with city size.
- **Stakeholder Interviews:** Interview key stakeholders, including urban planners, community leaders, and residents, to gather their perspectives on the impact of population decline and the effectiveness of interventions. These interviews can help identify barriers to successful interventions and potential strategies for addressing vacancy.

### Policy Implications

The findings of this research can have significant policy implications for urban planning and development. By understanding the relationship between population decline and VUL, policymakers can develop targeted interventions that address the specific needs of their cities. Identifying systematic intervention thresholds can help cities anticipate and prepare for the onset of vacancy, enabling them to take proactive measures to prevent the escalation of the problem. Additionally, recognizing the variation of intervention thresholds with city size can inform the development of context-specific policies and strategies, enhancing their efficacy and impact.

In conclusion, the impact of urban population decline on the spatial patterns and scale of VUL is a complex issue that requires a comprehensive and interdisciplinary approach. By investigating the relationship between population decline and VUL, identifying systematic intervention thresholds, and tailoring interventions to the specific characteristics of different-sized cities, urban planners and policymakers can develop effective strategies to address vacancy and promote sustainable urban development.

### Model: RAG+Llama3.1-70b

The impact of urban population decline on the spatial patterns and scale of vacant land is a complex topic that requires careful analysis. Here's a detailed analysis of the topic:

**Impact of Urban Population Decline:**

1. **Vacant Land Expansion:** Urban population decline can lead to an increase in vacant land, as abandoned buildings and lots become more prevalent. This can result in the expansion of vacant land, both in terms of its total area and its spatial distribution.
2. **Spatial Distribution Patterns:** The spatial distribution patterns of vacant land can change significantly during periods of urban population decline. Initially, vacant land may be scattered throughout the city, but as the population decline continues, these scattered patches can coalesce into larger, contiguous areas of vacant land.
3. **Thresholds for Spatial Spread:** There may be systematic intervention thresholds during the spatial spread of vacant land, where the rate of vacant land expansion accelerates or decelerates. These thresholds can vary with city size, with larger cities potentially experiencing more rapid vacant land expansion due to their larger population bases.

**City Size and Vacant Land Expansion:**

1. **Small Cities:** Small cities may experience more gradual vacant land expansion, as their smaller population bases result in slower rates of population decline.
2. **Medium-Sized Cities:** Medium-sized cities may experience more rapid vacant land expansion, as their larger population bases result in faster rates of population decline.
3. **Large Cities:** Large cities may experience the most rapid vacant land expansion, as their large population bases result in the fastest rates of population decline.

**Intervention Thresholds:**

1. **Initial Threshold:** The initial threshold for vacant land expansion may occur when the urban population decline reaches a certain percentage, such as 10-20%. At this point, vacant land may begin to expand more rapidly, as the city's population base declines.
2. **Accelerated Threshold:** The accelerated threshold for vacant land expansion may occur when the urban population decline reaches a higher percentage, such as 30-40%. At this point, vacant land expansion may accelerate significantly, as the city's population base declines more rapidly.
3. **Deceleration Threshold:** The deceleration threshold for vacant land expansion may occur when the urban population decline reaches a certain percentage, such as 50-60%. At this point, vacant land expansion may decelerate, as the city's population base declines more slowly.

**Spatial Patterns of Vacant Land:**

1. **Scattered Patches:** Initially, vacant land may be scattered throughout the city, with small patches of vacant land located in various neighborhoods.
2. **Contiguous Wastelands:** As the urban population decline continues, these scattered patches can coalesce into larger, contiguous areas of vacant land, forming wastelands that can have significant negative impacts on the city's economy and quality of life.

**Conclusion:**

The impact of urban population decline on the spatial patterns and scale of vacant land is a complex topic that requires careful analysis. By understanding the relationships between urban population decline, vacant land expansion, and spatial distribution patterns, cities can develop more effective strategies for managing vacant land and mitigating its negative impacts.

### Model: RAG+Deepseek-R1-70b

Urban population decline has a profound impact on the spatial patterns and scale of vacant land, leading to significant changes in both the quantity and distribution of vacant areas. Here's a detailed analysis of how annual or cumulative urban population loss affects the expansion and spatial distribution of vacant land, as well as the systematic intervention thresholds during the spatial spread:

### 1. Impact of Urban Population Decline on Vacant Land Expansion

**a. Annual Population Loss:**
- **Gradual Increase in Vacancy:** Annual population loss leads to a gradual increase in vacant land as residences, businesses, and public facilities become underutilized or abandoned.
- **Economic Decline:** The economic downturn associated with population decline can reduce investment in urban areas, exacerbating the expansion of vacant land.

**b. Cumulative Population Loss:**
- **Accelerated Vacancy Expansion:** Cumulative population loss over several years can lead to a more accelerated expansion of vacant land, as the city's infrastructure becomes increasingly underutilized.
- **Shift in Land Use Patterns:** Prolonged population decline can result in shifts in land use patterns, with certain areas becoming predominantly vacant.

### 2. Spatial Distribution Patterns of Vacant Land

**a. Scattered Patches:**
- **Initial Stage:** In the early stages of population decline, vacant land may appear as scattered patches throughout the city. These patches are often the result of isolated building vacancies or small-scale disinvestment.
- **Peri-Urban Areas:** Scattered patches of vacant land are more common in peri-urban areas where urban sprawl has led to fragmented land use patterns.

**b. Contiguous Wastelands:**
- **Advanced Stage:** As population decline progresses, scattered patches of vacant land can coalesce into larger, contiguous areas of wasteland. This is particularly evident in central urban areas where multiple adjacent properties become vacant.
- **Industrial and Commercial Zones:** Contiguous wastelands are often found in former industrial and commercial zones, where large tracts of land have been abandoned due to economic decline.

### 3. Systematic Intervention Thresholds

**a. Initial Threshold:**
- **Early Warning Signs:** The initial threshold for intervention is when the first signs of population decline and vacancy begin to manifest. This is typically marked by a slight increase in vacancy rates and scattered patches of vacant land.
- **Proactive Measures:** At this stage, cities can implement proactive measures such as targeted investments in revitalization projects or incentives for new businesses to occupy vacant properties.

**b. Accelerated Threshold:**
- **Rapid Expansion of Vacancy:** The accelerated threshold is reached when the rate of vacant land expansion begins to accelerate, leading to more significant changes in the spatial distribution of vacant land. This is often accompanied by a noticeable decline in economic activity and urban vitality.
- **Comprehensive Strategies:** Cities must adopt comprehensive strategies to address the rapid expansion of vacant land, including large-scale urban planning initiatives and policy reforms to encourage reinvestment in declining areas.

**c. Critical Threshold:**
- **Irreversible Decline:** The critical threshold is reached when the expansion of vacant land becomes so extensive that it leads to irreversible urban decline. At this point, the city's infrastructure, economy, and social fabric are severely impaired.
- **Large-Scale Interventions:** Intervention at this stage requires large-scale, coordinated efforts to revitalize urban areas, potentially involving significant public and private investments, as well as innovative urban planning and design strategies.

### 4. Variation with City Size

**a. Small Cities:**
- **Gradual Decline:** Small cities experiencing population decline may exhibit a more gradual expansion of vacant land. The smaller population base means that the impact of annual or cumulative population loss is less dramatic.
- **Localized Vacancy:** Vacant land in small cities is often localized, with scattered patches emerging in specific neighborhoods or districts.

**b. Medium-Sized Cities:**
- **Moderate Expansion:** Medium-sized cities may experience a moderate expansion of vacant land, with both scattered patches and some contiguous areas developing over time.
- **Targeted Interventions:** These cities can benefit from targeted interventions to address vacancy, such as focused investment in key neighborhoods or the redevelopment of strategic sites.

**c. Large Cities:**
- **Rapid Expansion:** Large cities are more likely to experience rapid expansion of vacant land due to their larger population bases and the potential for significant economic shifts.
- **Extensive Wastelands:** In large cities, the spatial distribution of vacant land can evolve from scattered patches to extensive contiguous wastelands, particularly in areas with high levels of disinvestment.
- **Comprehensive Strategies:** Addressing vacancy in large cities requires comprehensive strategies that integrate urban planning, economic development, and social policies to revitalize urban areas and reverse decline.

### 5. Conclusion

The impact of urban population decline on the spatial patterns and scale of vacant land is a complex phenomenon influenced by both the rate and cumulative effects of population loss. As cities experience population decline, vacant land expands from scattered patches to contiguous wastelands, with systematic intervention thresholds marking critical points for action. These thresholds vary with city size, requiring tailored strategies to address the unique challenges faced by small, medium-sized, and large cities. By understanding these dynamics, urban planners and policymakers can develop effective interventions to mitigate the negative impacts of population decline and promote sustainable urban development.

### Model: RAG+Gemma3-27b

The impact of urban population decline on the spatial patterns and scale of vacant land is a complex and multifaceted issue with significant implications for urban sustainability and equity. Here’s a detailed analysis:

**1. The Relationship Between Population Loss and Vacant Land Expansion:**

* **Non-Linear Dynamics:** The relationship isn’t linear. Initial population loss may lead to scattered vacancy, but beyond a certain point, vacancy accelerates due to factors like negative feedback loops (e.g., declining property values, reduced investment, further population loss).
* **Cumulative Effects:** Cumulative population loss over decades has a more profound impact than short-term fluctuations. Prolonged decline leads to systemic disinvestment and the erosion of urban fabric.
* **Economic Structure:** The impact of population loss is exacerbated in cities with a concentrated industrial base or a lack of economic diversification.
* **Policy & Planning Influence:** Proactive planning and investment can mitigate the effects of population decline, while inaction can accelerate vacancy.

**2. Spatial Distribution Patterns – From Patches to Wastelands:**

* **Initial Stage (Scattered Patches):** Early population loss manifests as isolated vacancies – abandoned homes, closed businesses. These are often dispersed throughout the city.
* **Intermediate Stage (Clustering):** As decline continues, vacancies begin to cluster in specific neighborhoods, often those with lower property values or a history of disinvestment.
* **Advanced Stage (Contiguous Wastelands):** Prolonged decline leads to the formation of large, contiguous areas of vacant land – “wastelands” – characterized by widespread abandonment, blight, and environmental degradation. These are frequently concentrated in former industrial areas or historically marginalized communities.
* **Spatial Autocorrelation:** Vacancy tends to be spatially autocorrelated – areas with high vacancy rates are often adjacent to other areas with high vacancy rates.

**3. Systematic Intervention Thresholds (and Variability by City Size):**

* **Early Warning Threshold (5-10% Vacancy Rate):** When vacancy rates exceed 5-10%, it signals the beginning of a potential problem. Interventions at this stage should focus on stabilizing neighborhoods, attracting investment, and preventing further decline.
* **Accelerated Decline Threshold (15-20% Vacancy Rate):** A vacancy rate of 15-20% indicates accelerated decline and requires more aggressive interventions, such as targeted redevelopment projects, property tax incentives, and code enforcement.
* **Critical Threshold (25%+ Vacancy Rate):** A vacancy rate exceeding 25% represents a critical situation requiring large-scale interventions, including comprehensive neighborhood revitalization plans and potential land banking strategies.

 **Threshold Variability by City Size:**
 * **Small Cities (<50,000 population):** Lower absolute numbers of vacant properties can trigger a sense of crisis more quickly due to limited resources and a smaller tax base. Thresholds may be lower (e.g., 5-7% vacancy rate).
 * **Medium-Sized Cities (50,000-500,000 population):** More resilient due to greater economic diversification, but still vulnerable to concentrated vacancy in specific neighborhoods. Thresholds around 10-15%.
 * **Large Cities (>500,000 population):** Greater capacity to absorb vacancy, but large-scale decline can have devastating consequences. Thresholds may be higher (e.g., 15-20%), but require robust monitoring and proactive planning.

**4. Addressing Social and Equity Implications:**

* **Disproportionate Impact:** Vacancy disproportionately affects marginalized communities, exacerbating existing inequalities.
* **Community Engagement:** Prioritize community engagement in all planning and redevelopment efforts.
* **Anti-Displacement Measures:** Implement policies to prevent displacement of long-term residents during revitalization projects.
* **Equitable Redevelopment:** Ensure that redevelopment projects benefit all residents, not just developers or newcomers.

**5. Conclusion:**

Managing the impact of urban population decline on vacant land requires a proactive, data-driven, and equitable approach. Identifying intervention thresholds, tailoring strategies to city size and economic context, and prioritizing community engagement are essential for transforming vacant land from a source of blight into an opportunity for sustainable and inclusive urban development. Continuous monitoring, adaptive management, and a commitment to social justice are crucial for long-term success.

### Model: RAG+GPT-4o

Urban population decline significantly affects the spatial patterns and scale of vacant land, influencing its expansion and distribution within a city. Here's an analysis of how these dynamics unfold:

**1. Impact on Vacant Land Expansion:**

- **Annual Population Loss:**
 - **Incremental Vacancy Growth:** Even a modest annual decline in population can lead to incremental increases in vacant land, as properties become unoccupied and underutilized.
 - **Localized Effects:** Initially, vacancy might appear as isolated patches concentrated in neighborhoods experiencing higher rates of out-migration or economic distress.

- **Cumulative Population Loss:**
 - **Accelerated Vacancy Expansion:** Over time, cumulative population decline can lead to widespread increases in vacant land, often resulting in significant portions of the city being affected.
 - **Shift in Land Use Patterns:** Prolonged declines can change land use patterns, with some areas transitioning from residential or commercial to predominantly vacant land.

**2. Spatial Distribution Patterns:**

- **Scattered Patches:**
 - **Early Stages:** In the initial stages of population decline, vacant land often manifests as scattered patches, particularly in economically vulnerable neighborhoods.
 - **Influence of Infrastructure:** Areas with better infrastructure may initially resist vacancy spread, while less connected areas see earlier signs of vacancy.

- **Contiguous Wastelands:**
 - **Advanced Stages:** As decline progresses, scattered patches can coalesce into larger, contiguous areas of vacant land, particularly in regions with high levels of economic disinvestment.
 - **Concentration in Specific Zones:** Former industrial areas or regions with large-scale housing projects may become contiguous wastelands due to their scale and prior economic roles.

**3. Systematic Intervention Thresholds:**

- **Early Intervention Thresholds:**
 - **5-10% Vacancy Rate:** At this stage, intervention can prevent further decline. Strategies may include targeted investment and community revitalization programs.

- **Mid-Level Intervention Thresholds:**
 - **15-20% Vacancy Rate:** More aggressive interventions are necessary, such as land banking, strategic redevelopment, and enhanced public-private partnerships.

- **Critical Intervention Thresholds:**
 - **25%+ Vacancy Rate:** At this level, comprehensive urban renewal and large-scale policy interventions are essential to reverse decline and attract reinvestment.

**4. Variation with City Size:**

- **Small Cities:**
 - **Rapid Perception of Crisis:** Smaller cities might perceive crisis conditions with lower percentages of vacancy due to limited resources and economic diversity.
 - **Localized Strategies:** Interventions can be more targeted and community-focused, leveraging strong local networks.

- **Medium-Sized Cities:**
 - **Moderate Resilience:** These cities might show moderate resilience due to greater economic diversity but still face significant challenges in specific neighborhoods.
 - **Balanced Approaches:** A mix of localized and city-wide strategies can be effective.

- **Large Cities:**
 - **Capacity for Absorption:** Larger cities often have more resources to absorb population loss, but large-scale vacancy can lead to severe urban decay if not addressed.
 - **Comprehensive Strategies:** Large-scale, integrated urban planning strategies are necessary to manage vacancy and regenerate affected areas.

**5. Policy and Planning Implications:**

- **Data-Driven Decision Making:** Use spatial analysis and predictive modeling to identify at-risk areas and prioritize interventions.
- **Community Engagement:** Engage local communities in planning processes to ensure interventions meet local needs and are sustainable.
- **Flexible Zoning and Incentives:** Implement flexible zoning laws and incentives to encourage redevelopment and adaptive reuse of vacant land.

Understanding the dynamics of population decline and its impact on vacant land can help cities develop targeted and effective strategies to manage vacancy, promote sustainable development, and enhance urban resilience.

## Reviewer metric

All indicator scores range **from 1 to 10**, with 1 representing the worst performance and 10 representing the best.

- **Accuracy:** Refers to how correct and factually sound the model’s output is. An accurate answer should be free from factual errors and demonstrate a correct understanding of the question or prompt.
- **Relevance:** Indicates how closely the generated text corresponds to the user’s query or the given context. A relevant answer addresses the user’s needs directly without going off-topic.
- **Depth/Completeness:** Looks at the depth and granularity of the information provided. A detailed response goes beyond high-level statements and provides specific facts, explanations, or examples where appropriate.
- **Consistency:** Assesses whether the text is logically coherent and internally consistent. A consistent answer should not contradict itself or provide conflicting information in different parts of its response.
- **Readability:** Concerns how easily a reader can understand the output. A readable response is clearly written, well-structured, and free from confusing language or unnecessarily complex sentences.
- **Usefulness:** Evaluates how helpful or valuable the content is in solving the user’s problem or informing the user. A useful response should provide practical information, guidance, or insights that the user can apply.
- **Creativity:** Pertains to originality and inventiveness in the generated text. A creative answer might present novel ideas, unique perspectives, or imaginative scenarios when appropriate (e.g., in a storytelling context).
- **Safety:** Relates to whether the content avoids harmful, offensive, or inappropriate language. A safe response should comply with ethical and legal standards, and refrain from promoting misinformation or dangerous behavior.

| **Indicator** | **Accuracy** | **Relevance** | **Depth/Completeness** | **Consistency** | **Readability** | **Usefulness** | **Creativity** | **Safety** |
| --- | --- | --- | --- | --- | --- | --- | --- | --- |
| **Qwen2.5-7b** |  |  |  |  |  |  |  |  |
| **Llama3.1-8b** |  |  |  |  |  |  |  |  |
| **Deepseek-R1-7b** |  |  |  |  |  |  |  |  |
| **Gemma3-4b** |  |  |  |  |  |  |  |  |
| **GPT-4o- mini** |  |  |  |  |  |  |  |  |
| **Qwen2.5-72b** |  |  |  |  |  |  |  |  |
| **Llama3.1-70b** |  |  |  |  |  |  |  |  |
| **Deepseek-R1-70b** |  |  |  |  |  |  |  |  |
| **Gemma3-27b** |  |  |  |  |  |  |  |  |
| **GPT-4o** |  |  |  |  |  |  |  |  |
| **RAG+ Qwen2.5-72b** |  |  |  |  |  |  |  |  |
| **RAG+ Llama3.1-70b** |  |  |  |  |  |  |  |  |
| **RAG+ Deepseek-R1-70b** |  |  |  |  |  |  |  |  |
| **RAG+ Gemma3:27b** |  |  |  |  |  |  |  |  |
| **RAG+ GPT-4o** |  |  |  |  |  |  |  |  |
